# Supplementary material for: Molecular Formula Prediction for Chemical Filtering of 3D OrbiSIMS Datasets
Source: PubMed Central journal article supplement (PMC8943605; doi:10.1021/acs.analchem.1c04898), 2022-03-11
Supplement: ac1c04898_si_001.pdf [file ac1c04898_si_001.pdf]

## Supplementary Information for

### Molecular Formula Prediction for Chemical Filtering of 3D OrbiSIMS Datasets

Max K. Edney,<sup>1</sup> Anna M. Kotowska,<sup>2</sup> Matteo Spanu,<sup>1</sup> Gustavo F. Trindade,<sup>2,4</sup> Edward Wilmot,<sup>3</sup> Jacqueline Reid,<sup>3</sup> Jim Barker,<sup>3</sup> Jonathan W. Aylott,<sup>2</sup> Alexander G. Shard,<sup>4</sup> Morgan R. Alexander,<sup>2</sup> Colin E. Snape<sup>1</sup> & David J. Scurr<sup>2</sup>

<sup>1</sup>Department of Chemical and Environmental Engineering, University of Nottingham, Nottingham, NG7 2RD, UK

<sup>2</sup>School of Pharmacy, University of Nottingham, Nottingham, NG7 2RD, UK

<sup>3</sup>Innospec Ltd., Oil Sites Road, Ellesmere Port, Cheshire, CH65 4EY, UK

<sup>4</sup>National Physical Laboratory, Hampton Road, Teddington, Middlesex, TW11 0LW, UK

#### Table of Contents:

##### Supplementary Notes:

Supplementary Note 1: SIMS MFP software graphical user interface.....S2

##### Supplementary Figures:

Supplementary Figure 1: Interface of SIMS-MFP software showing all possible outputs.....S2

Supplementary Figure 2: 3D OrbiSIMS depth profiles of organic and inorganic species on aluminum foil.....S4

Supplementary Figure 3: 3D OrbiSIMS depth profiles of intense sulfated species in engine deposit 1.....S5

Supplementary Figure 4: Application of MFP to identify carboxylic acids in engine deposits.....S6

Supplementary Figure 5: Application of MFP and MVA on carbonaceous ion datasets in engine deposits.....S7

Supplementary Figure 6: NMF analysis on the raw 3D OrbiSIMS data from engine deposit 1 with different conditions.....S9

##### Supplementary Tables:

Supplementary Table 1: Output data file from SIMS-MFP of molecular formula which fit the constraints of from the searches of the aluminum foil and organic contaminants.....S10

Supplementary Table 2: Lipid group assignments made automatically in the human serum sample.....S22

Supplementary Table 3: First 60 of 3,328 peaks assigned in human serum as potential protein fragments.....S28

Supplementary Table 4: Assignments of abundant serum proteins, albumin, transferrin and fibronectin.....S30

Supplementary Table 5: Assignments of 50 most abundant salt ions in the human serum spectrum.....S31

Supplementary Table 6: Output from SIMSMFP on carbonaceous ions (C<sub>n</sub>H<sub><1</sub><sup>-</sup>) found in negative ion depth profile datasets from engine deposits.....S33

Supplementary Table 7: Output from SIMS-MFP on all species containing two oxygen atoms found in negative ion depth profiles from engine deposits.....S35

Supplementary Table 8: Output from SIMS-MFP on all sulfonated species found in negative ion depth profile datasets from engine deposits.....S59

## Supplementary note 1 - SIMS-MFP software graphical user interface

The need to simplify high-resolution 3D SIMS datasets is ever-growing in the field, SIMS-MFP software combines tools for MFP, categorization of species by double bond equivalence (DBE) and integrates existing MVA tools which can be linked to existing SIMS-MVA software.<sup>9</sup> A unique feature of this program is its incorporation to SIMS depth profiling data and the graphical user interface (GUI) (**Supplementary Figure 1**) is to display the profiles in both the pre and post filtered list and throughout this work we show its use for validating the grouping of secondary ions and is discussed in this work.

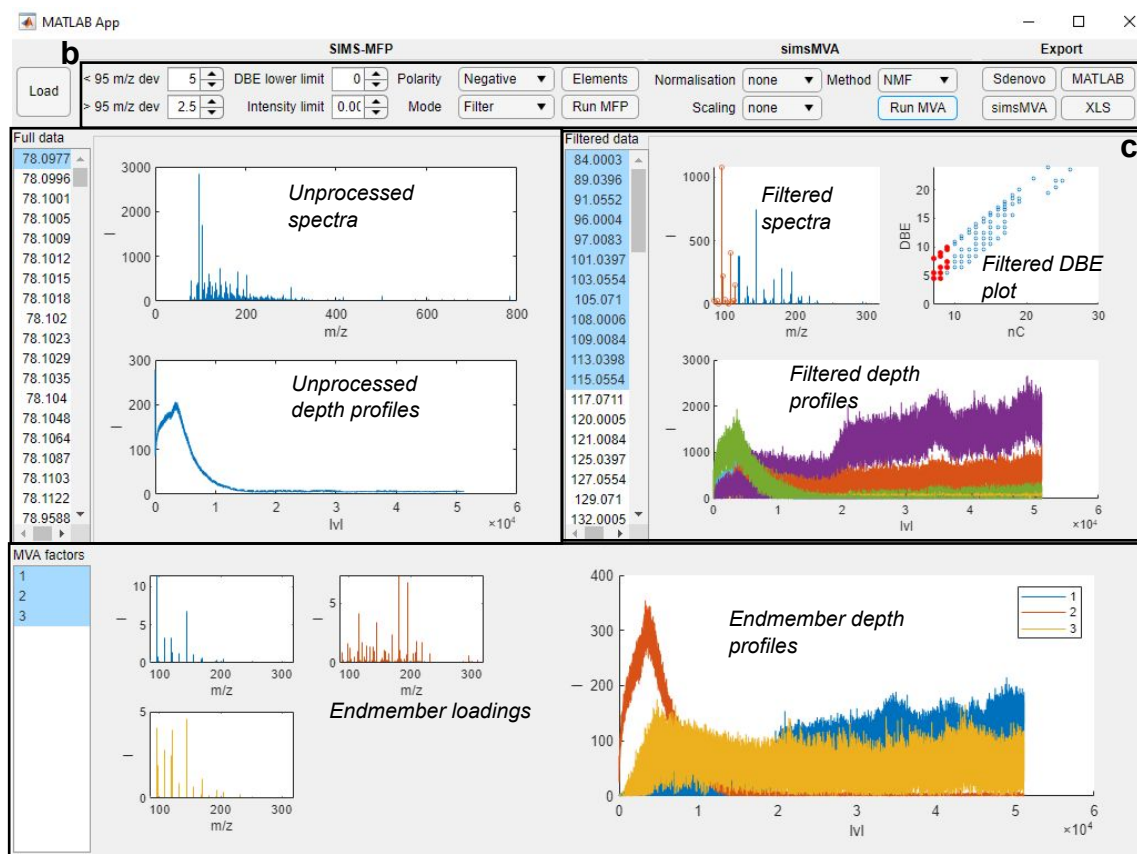

**Supplementary Figure 1.** Interface of the SIMS-MFP software showing key steps for the workflow an example 3D OrbiSIMS dataset. A. Display of the pre-filtered data including raw spectra and profiles of selected species. B. Inputting search criteria, error thresholds, DBE and intensity lower limits, polarity and the elemental compositions ('elements' button must be selected). C. After selecting 'Run MFP' the output data is shown. The filtered spectra of ions identified (left) and DBE versus carbon number of ions found in the search are displayed. Depth profiles for species can be selected also. D. The result of 'Run MVA' on the filtered depth profiling data. Data output is shown after performing MVA on the filtered list.

Upon loading a selected depth profile matrix by selecting the 'Load' button, the software displays the peak list and profiles for each ion in the list (**Supplementary Figure 1a**). Next, the user enters pre-set criteria for the filter, namely elemental compositions by clicking the 'elements' button (**Supplementary Figure 1b**), which brings up a

table where maximum and minimum values are chosen, an untargeted approach can be used by selecting '-1' in the maximum value. Other constraints can be determined such as minimum DBE value, maximum error threshold (we recommend < 2 ppm for ions >  $m/z$  95) and minimum peak intensity which are selected using the buttons in **Supplementary Figure 1b**. After selecting the 'Run MFP' button the program will run and cycle through each  $m/z$  value in the list and attempt to calculate its formula based on the preset criteria and will calculate DBE on proposed molecular formula. The program generates several plots (**Supplementary Figure 1c**). Firstly, a mass spectrum containing only ions with formula meeting the preset criteria (termed 'filtered spectra'). Second, a plot of the DBE versus carbon number of all possible assignments in the filtered data ('filtered DBE plot'). The list of ions with possible matching formula are displayed and their profiles can be displayed as well. A file is also produced which is exported to MATLAB and contains the formula predictions of each ion, and DBE value of each candidate for further interrogation by the user. If more than one formula can be assigned to a peak this is also shown. We include code which can match assigned ions to those in the LIPIDMAPS. Another feature in the SIMS-MFP toolkit is a 'mass separator' button which is accessed in the 'mode' drop-down menu (**Supplementary Figure 1a**). This generates a separated spectrum containing all peaks that could not be matched to the preset criteria. A list of non-included ions is generated which can be put back into the formula finder if the user wishes to further interrogate separated species which may be of use when analyzing sample and substrate peaks, for example. The user can perform MVA on filtered datasets by accessing the MVA tab in the GUI (**Supplementary Figure 1b**). We show an example after running non-negative matrix factorization (NMF) on the filtered depth profile data. The number of iterations and endmembers can be chosen and are displayed in the lower portion of the GUI which shows loadings and profiles of each endmember (**Supplementary Figure 1d**). In each case the plots can be exported as png. or svg. files. SIMS-MFP can incorporate datasets from multiple samples, allowing other MVA techniques to be performed such as principal component analysis or K-means clustering. Filtered data can be exported to `simsMVA`<sup>5</sup> for further interrogation by MVA techniques.

## Supplementary Figures

(a) Al clusters

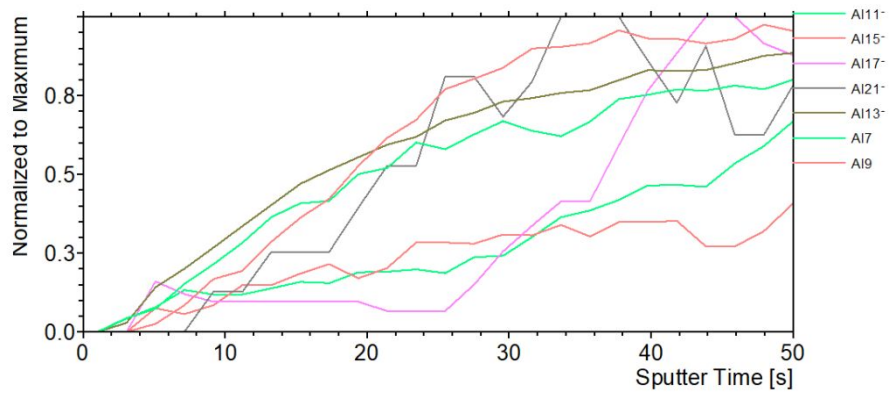

(b) Al oxides and hydroxides

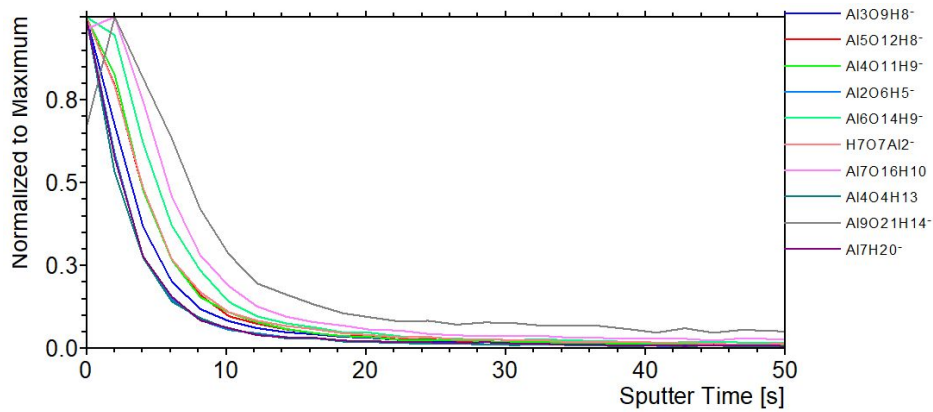

(c) Al oxides and hydroxides and intense organics ions

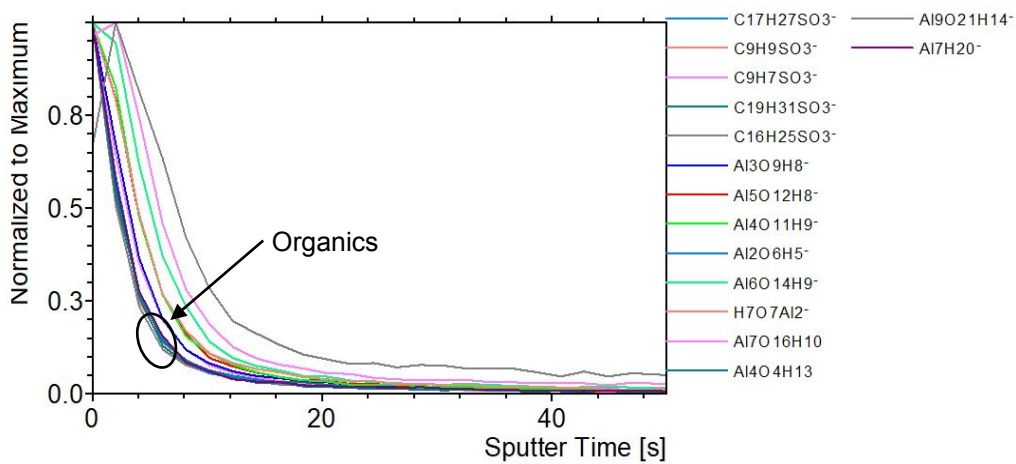

(d) Species in LIPIDMAPS

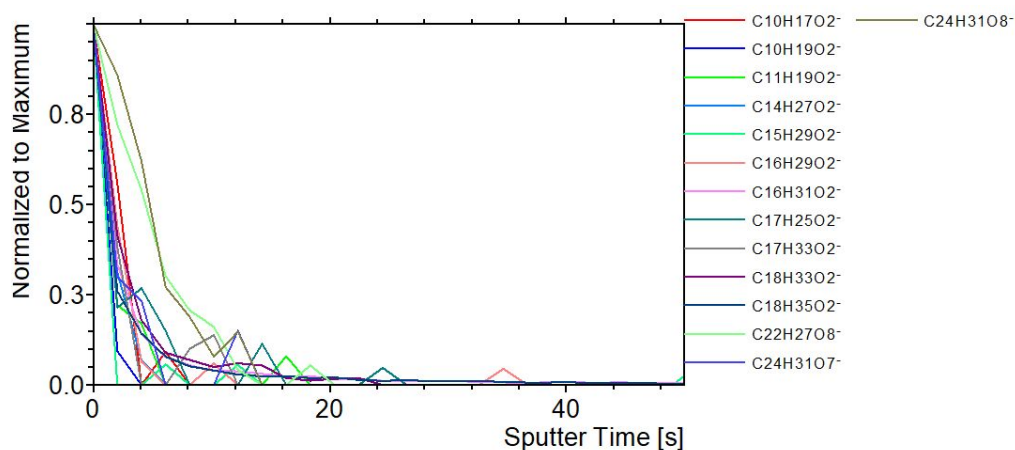

Supplementary Figure 2: 3D OrbiSIMS depth profiles of the organic and inorganic species on the dull side of the aluminum foil.

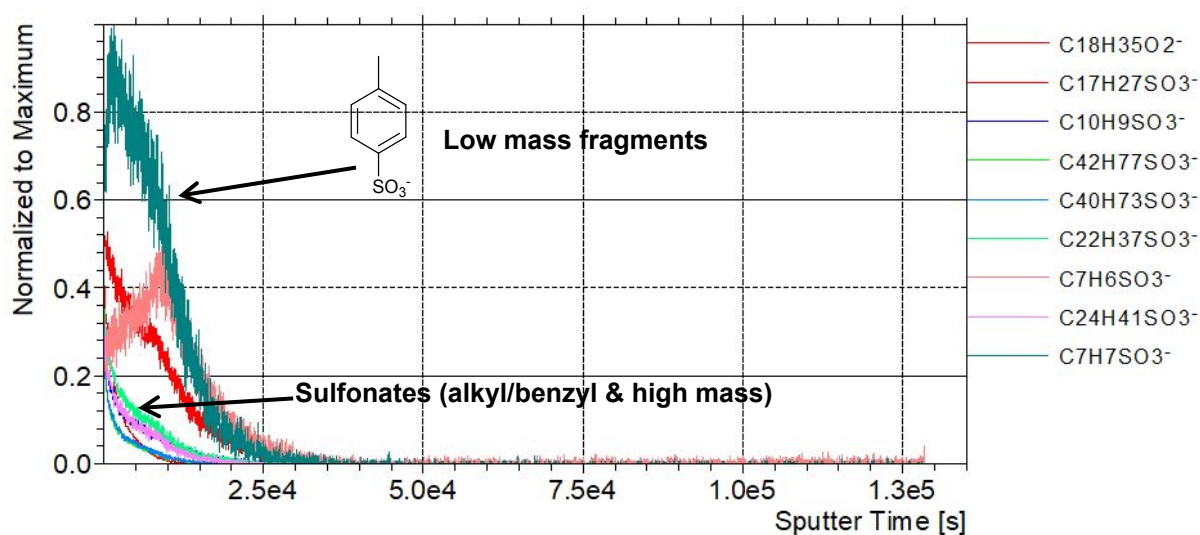

Supplementary Figure 3. Application of MFP to identify sulfated species (C & H = any, O = 3, S = 1) in engine deposits. Depth profiles of the 10 most intense species found in the search are shown.

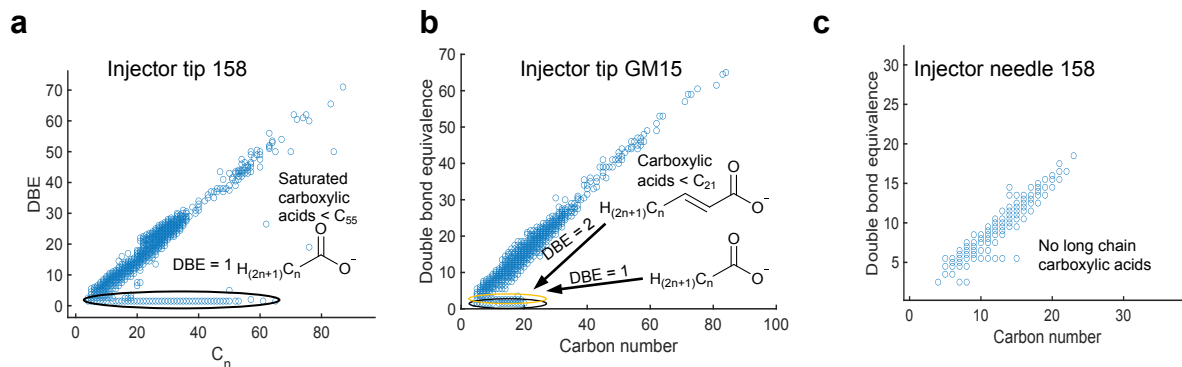

CHO species

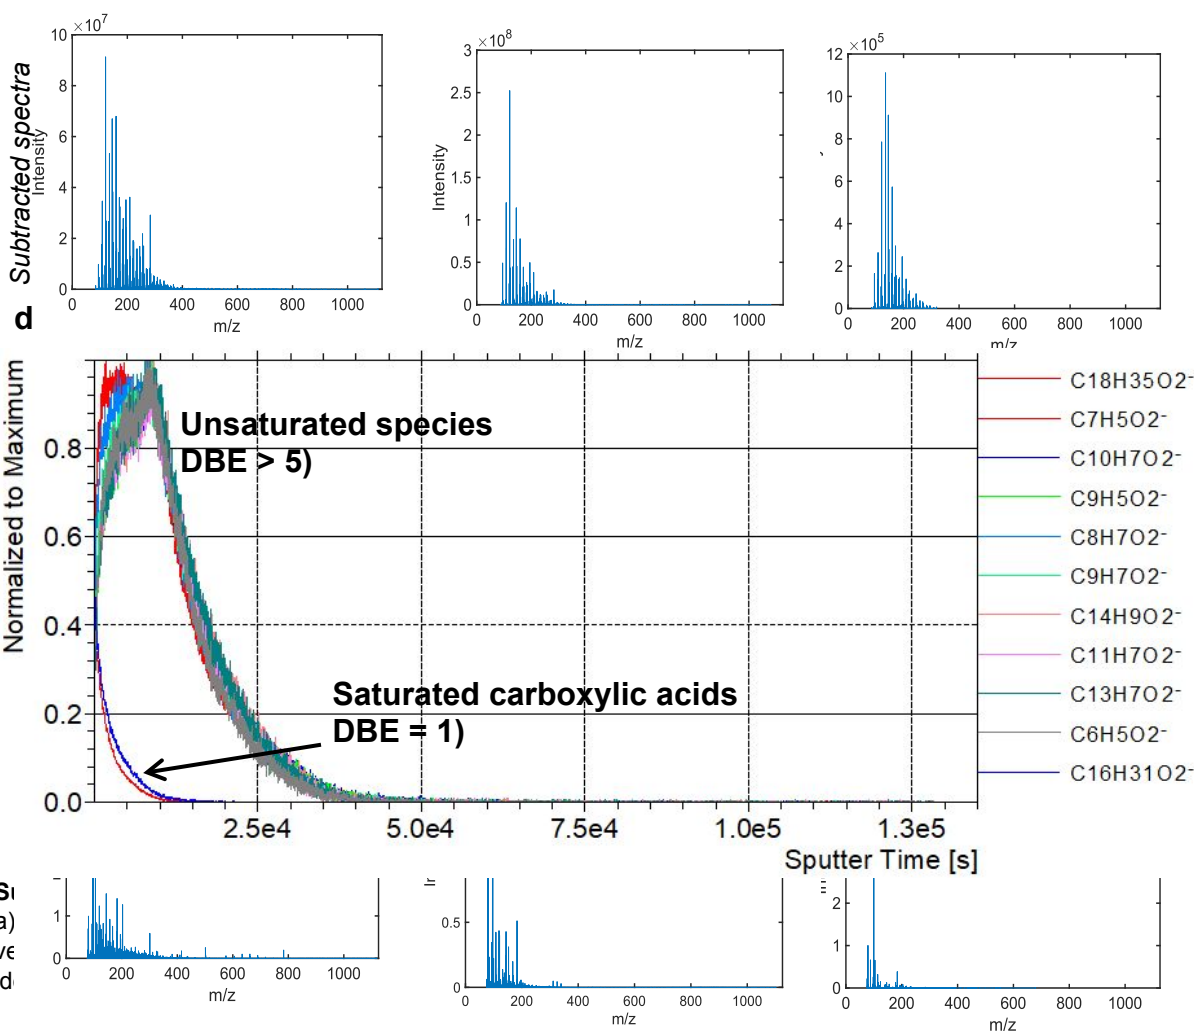

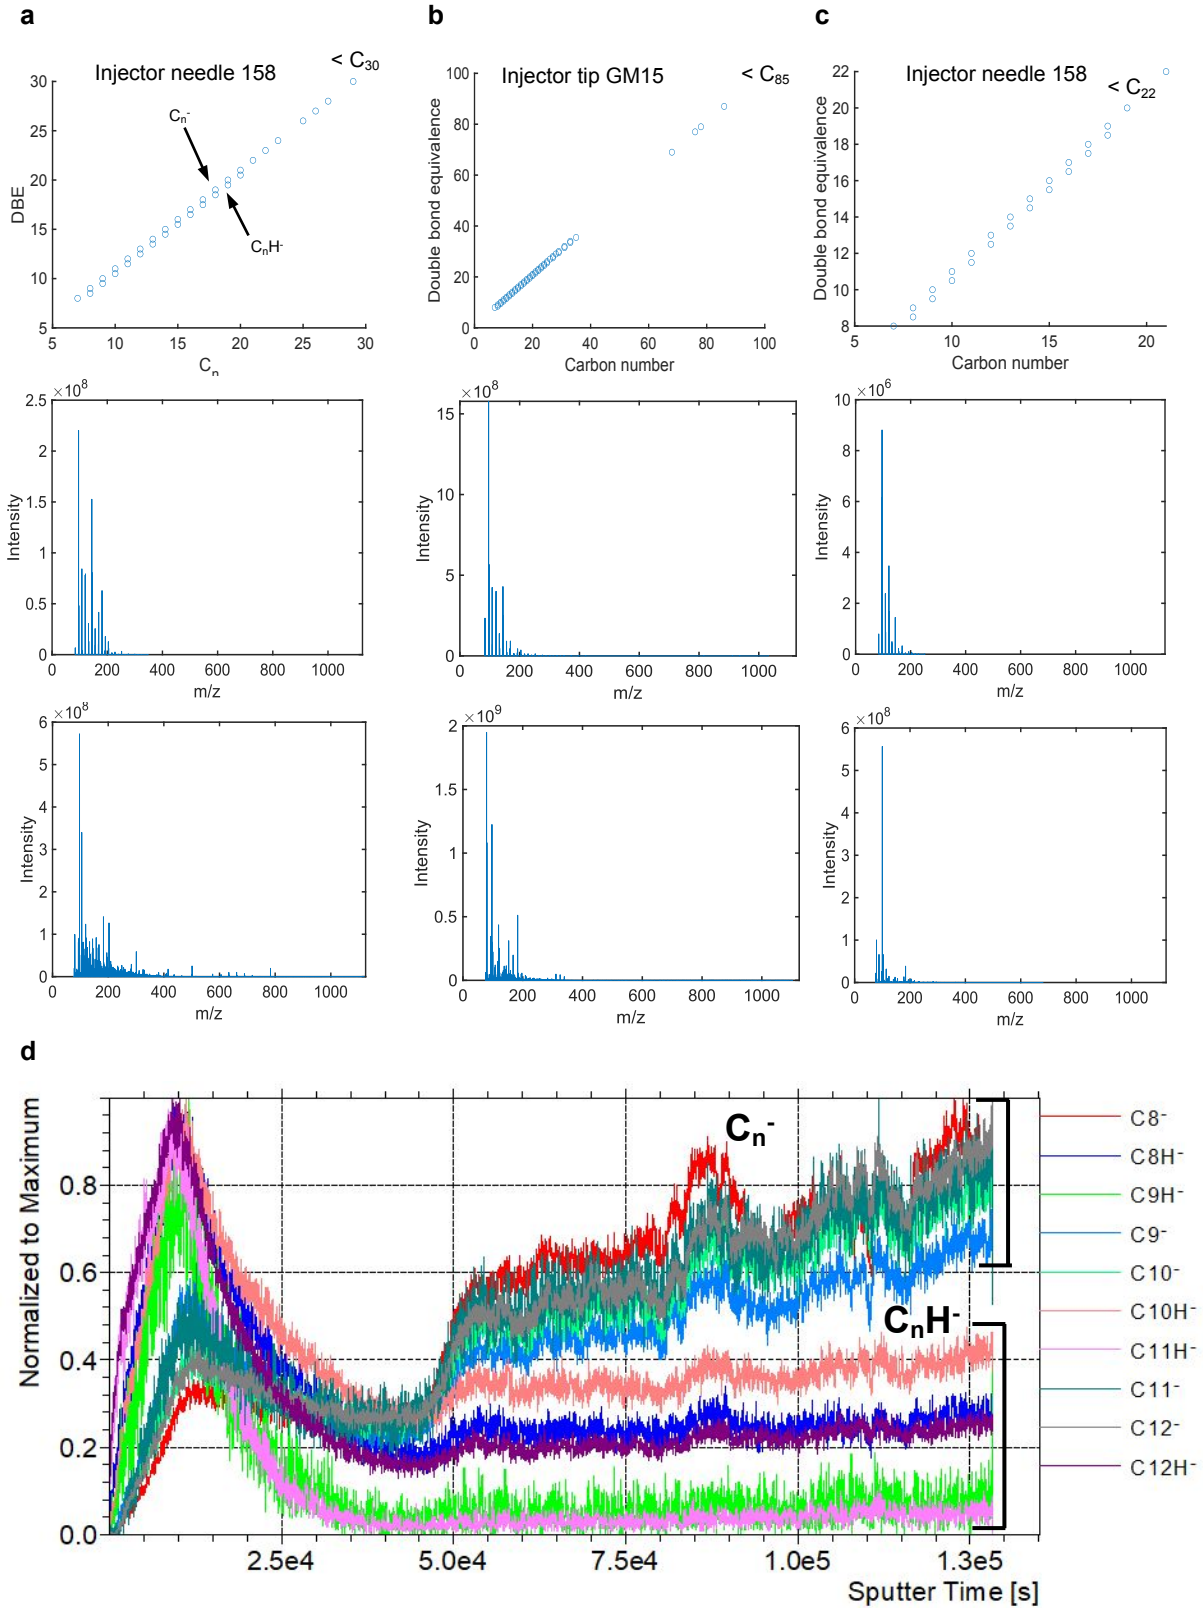

e

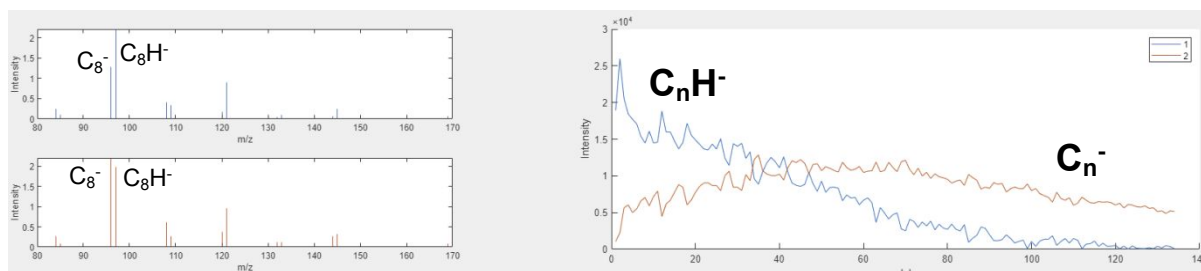

**Supplementary Figure 5.** Application of the SIMS-MFP software to identify carbonaceous ions ( $C = \text{any}$ ,  $H \leq 1$ ) in engine deposits. a) injector tip 1, b) injector tip deposit 2 and c) injector needle 1. In each case the double bond equivalence (DBE) versus carbon number of each ion identified is displayed above, the middle plot shows the spectra of species identified and below are the subtracted spectra of species not found in the search. d) Depth profiles of intense ions in the filtered data set. e) NMF outputs on carbonaceous ions from injector needle 1.

a) 3 endmembers (200 iterations)

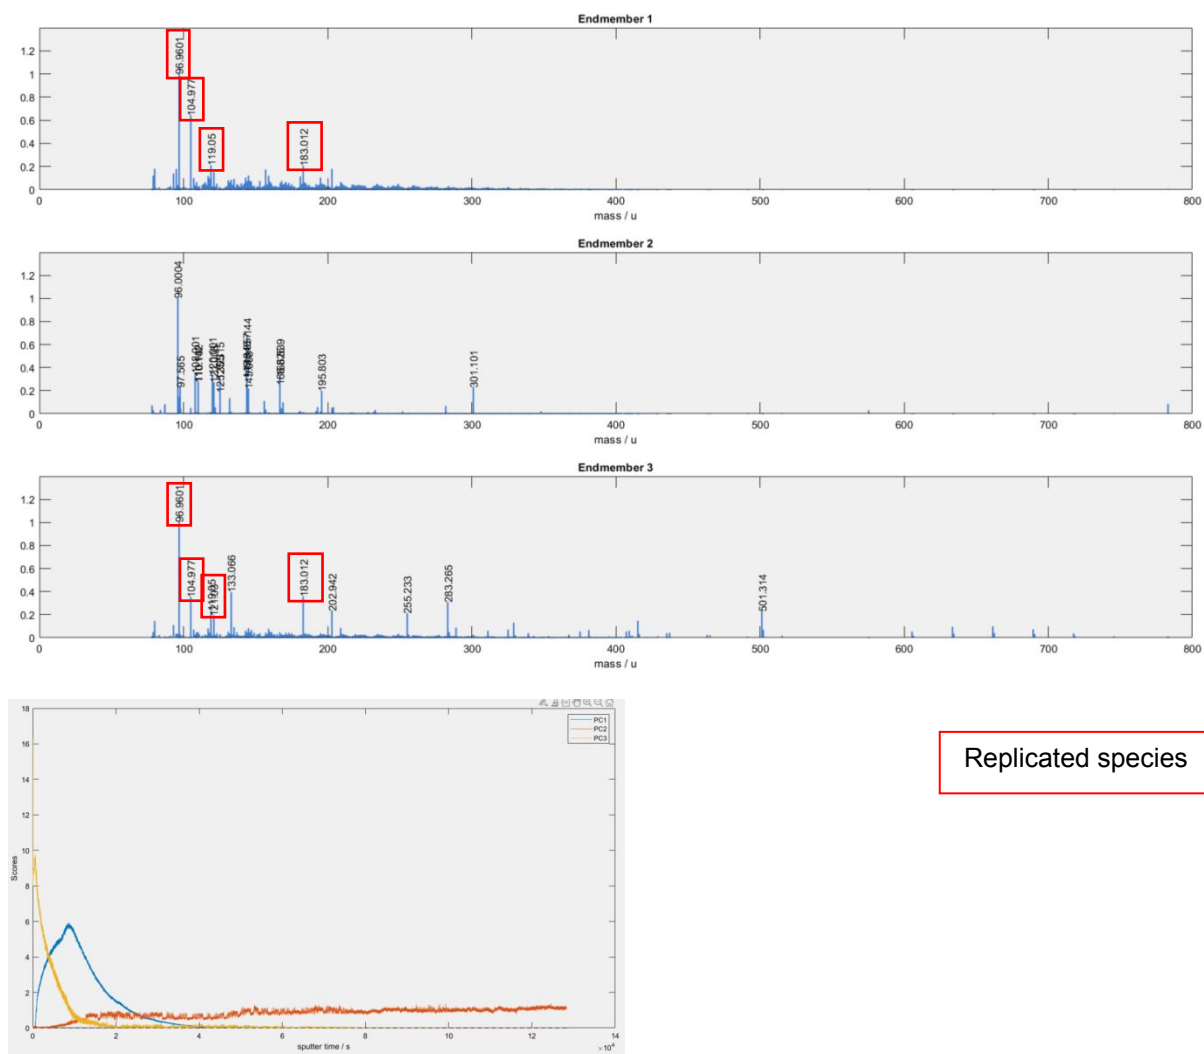



**b) 4 endmembers (200 iterations)**

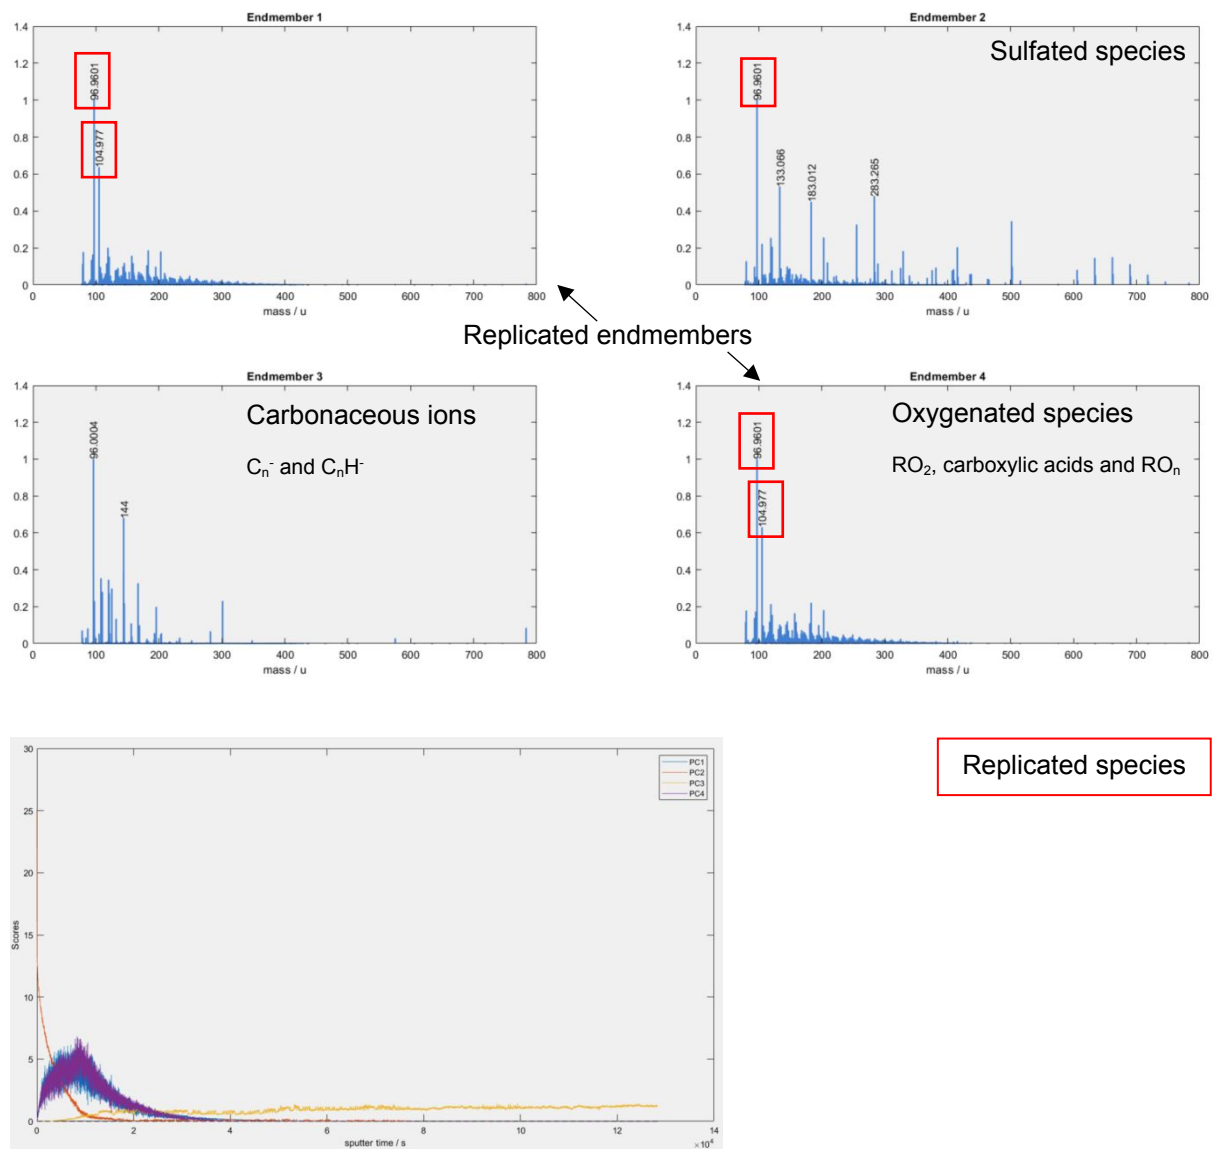

**Supplementary Figure 6.** NMF analysis on the raw 3D OrbiSIMS spectra with different conditions, a) with 3 endmembers, b) with 4 endmembers. In each case there was overfitting of data, loadings grouped species together with different elemental compositions and depth profiling behaviors.

**Supplementary Table 1:** Output data file from SIMS-MFP of molecular formula which fit the constraints of from the searches of the aluminum foil. a) Al search showing species containing at least one Al atom. b) Categories of organic species by compound class found by using MFP. i. sulfonated species on the dull side, ii. sulfonated species on the shiny side, iii. hydrocarbons, iv. ions with matching formulas in the LIPIDMAPS database. The full table of all possibilities of organic assignments can be found in the data repository.

a)

| Mass     | Deviation (ppm) | DBE   | Area (AU) | H   | O  | Al |
|----------|-----------------|-------|-----------|-----|----|----|
| 81.9528  | -2.36599        | 0.5   | 29202.37  | 1   | 0  | 3  |
| 93.9851  | -1.31829        | -0.5  | 6304.99   | 3   | 4  | 1  |
| 94.9929  | -1.56748        | -1    | 215412.1  | 4   | 4  | 1  |
| 120.9667 | -0.52824        | -0.5  | 50637.13  | 3   | 4  | 2  |
| 135.0452 | -2.06523        | -5    | 3058.09   | 12  | 6  | 1  |
| 138.9772 | -0.92749        | -1.5  | 1581.66   | 5   | 5  | 2  |
| 153.9643 | -0.77226        | -1    | 8159.43   | 4   | 6  | 2  |
| 154.9722 | -0.28328        | -1.5  | 1201790   | 5   | 6  | 2  |
| 157.9997 | 2.285453        | -64   | 4875.14   | 130 | 0  | 1  |
| 161.8897 | -0.54914        | 1     | 1529.14   | 0   | 0  | 6  |
| 164.9508 | -1.47862        | -1    | 3050.22   | 4   | 5  | 3  |
| 169.9592 | -0.78784        | -1    | 4463.18   | 4   | 7  | 2  |
| 172.9827 | -0.62954        | -2.5  | 896617.4  | 7   | 7  | 2  |
| 185.0078 | -1.58858        | -5.5  | 668558.8  | 13  | 4  | 4  |
| 186.0155 | -2.25196        | -6    | 6841.45   | 14  | 4  | 4  |
| 188.8712 | -0.68248        | 1     | 17995.48  | 0   | 0  | 7  |
| 188.9395 | -2.34942        | -2    | 1539.45   | 6   | 3  | 5  |
| 196.9406 | -1.39077        | -1    | 7909.87   | 4   | 7  | 3  |
| 198.9563 | -1.12537        | -2    | 28016.37  | 6   | 7  | 3  |
| 203.0869 | -1.84108        | -9.5  | 1875.03   | 21  | 8  | 2  |
| 207.0121 | -0.38114        | -8    | 179955.3  | 18  | 0  | 7  |
| 209.0078 | 1.153547        | -65.5 | 2076.58   | 133 | 3  | 1  |
| 209.0277 | -0.61666        | -9    | 365964.6  | 20  | 0  | 7  |
| 210.0354 | -1.20884        | -9.5  | 10927.99  | 21  | 0  | 7  |
| 211.0191 | -2.31685        | -5.5  | 3120.67   | 13  | 9  | 2  |
| 211.0235 | 1.379469        | -66.5 | 6722.66   | 135 | 3  | 1  |
| 211.0434 | -0.37386        | -10   | 156752    | 22  | 0  | 7  |
| 212.051  | -1.43314        | -10.5 | 4717.13   | 23  | 0  | 7  |
| 212.9392 | -0.98103        | -62   | 6239.8    | 126 | 2  | 2  |
| 213.0349 | -1.59082        | -6.5  | 2032.9    | 15  | 9  | 2  |
| 213.0392 | 1.601116        | -67.5 | 3124.41   | 137 | 3  | 1  |
| 213.0588 | -1.5437         | -11   | 2889.3    | 24  | 0  | 7  |
| 213.9435 | -0.53238        | -1.5  | 10948.61  | 5   | 8  | 3  |
| 214.9513 | -0.64619        | -2    | 12324.95  | 6   | 8  | 3  |
| 219.8909 | -0.97275        | 1     | 2648.68   | 0   | 7  | 4  |
| 222.9145 | -0.39881        | -0.5  | 13956.12  | 3   | 7  | 4  |
| 224.9984 | -2.01734        | -4.5  | 3661.26   | 11  | 10 | 2  |
| 227.014  | -2.21968        | -5.5  | 1604.1    | 13  | 10 | 2  |
| 229.0296 | -2.41846        | -6.5  | 2111.22   | 15  | 10 | 2  |

|          |          |       |          |     |    |    |
|----------|----------|-------|----------|-----|----|----|
| 230.9498 | -0.75298 | -63   | 3515.04  | 128 | 3  | 2  |
| 230.9701 | -0.62302 | -6.5  | 15964.91 | 15  | 0  | 8  |
| 231.0453 | -2.18095 | -7.5  | 3092.73  | 17  | 10 | 2  |
| 231.9542 | 0.090966 | -2.5  | 1910.03  | 7   | 9  | 3  |
| 232.897  | -0.03821 | -61   | 1674.67  | 124 | 0  | 4  |
| 232.9619 | -0.446   | -3    | 2453274  | 8   | 9  | 3  |
| 235.8859 | -0.54645 | 1     | 2038.91  | 0   | 8  | 4  |
| 240.0779 | -2.28634 | -11.5 | 12662.63 | 25  | 5  | 5  |
| 242.8341 | -1.27206 | 1     | 16137.36 | 0   | 0  | 9  |
| 244.0408 | -1.36821 | -10.5 | 1646.89  | 23  | 2  | 7  |
| 244.9291 | -0.5671  | -62   | 3319.85  | 126 | 4  | 2  |
| 247.9488 | -1.18532 | -2.5  | 4929     | 7   | 10 | 3  |
| 248.9604 | -0.55792 | -64   | 6450.88  | 130 | 4  | 2  |
| 249.0224 | 0.767401 | -69   | 2295.21  | 140 | 0  | 4  |
| 255.0036 | -1.05449 | -6    | 2315.91  | 14  | 10 | 3  |
| 256.9197 | -1.43586 | -1.5  | 6397.06  | 5   | 9  | 4  |
| 256.9439 | -0.22923 | -6    | 1886     | 14  | 0  | 9  |
| 258.9354 | -1.23158 | -2.5  | 14957.81 | 7   | 9  | 4  |
| 265.1478 | 1.475029 | -77   | 6666.44  | 156 | 0  | 4  |
| 266.9023 | -0.70775 | -62   | 6290.46  | 126 | 2  | 4  |
| 266.9406 | 1.240352 | -62.5 | 2124.37  | 127 | 7  | 1  |
| 268.1092 | -0.05184 | -73.5 | 2645.02  | 149 | 4  | 2  |
| 269.9835 | -1.90345 | -7.5  | 2998     | 17  | 4  | 7  |
| 272.9387 | -0.63714 | -6    | 11529.97 | 14  | 1  | 9  |
| 273.9227 | -0.39756 | -2    | 6549.23  | 6   | 10 | 4  |
| 274.9306 | -0.1233  | -2.5  | 293296.2 | 7   | 10 | 4  |
| 276.0415 | -0.10469 | -69.5 | 2922.1   | 141 | 5  | 2  |
| 276.946  | -1.02511 | -3.5  | 6642.39  | 9   | 10 | 4  |
| 277.9468 | -1.30924 | -6    | 1631.78  | 14  | 3  | 8  |
| 281.0767 | -1.18793 | -11   | 3047.29  | 24  | 11 | 3  |
| 282.8972 | -0.72076 | -62   | 4146.27  | 126 | 3  | 4  |
| 282.9355 | 1.117217 | -62.5 | 5475.78  | 127 | 8  | 1  |
| 283.9424 | -2.14444 | -63   | 1676.86  | 128 | 8  | 1  |
| 284.9396 | -2.34751 | -4.5  | 1825.86  | 11  | 7  | 6  |
| 284.9777 | -1.2243  | -5    | 3069.42  | 12  | 12 | 3  |
| 291.0496 | 2.443232 | -12.5 | 6319.25  | 27  | 3  | 8  |
| 292.9412 | 0.003755 | -3.5  | 1304009  | 9   | 11 | 4  |
| 296.7971 | -1.31032 | 1     | 9700.74  | 0   | 0  | 11 |
| 298.8881 | -2.00376 | -1    | 1746.54  | 4   | 10 | 5  |
| 298.9123 | -0.9665  | -5.5  | 1528.59  | 13  | 1  | 10 |
| 300.9041 | -0.82717 | -2    | 8798.71  | 6   | 10 | 5  |
| 300.946  | 0.83437  | -63.5 | 21292.28 | 129 | 9  | 1  |
| 301.1269 | -0.79335 | -17.5 | 19725.67 | 37  | 3  | 8  |
| 302.9618 | 1.323931 | -64.5 | 5982.54  | 131 | 9  | 1  |
| 310.9071 | 0.196522 | -6    | 23629.31 | 14  | 0  | 11 |
| 312.9399 | -0.95513 | -64   | 4938.33  | 130 | 8  | 2  |

|          |          |       |          |     |    |    |
|----------|----------|-------|----------|-----|----|----|
| 314.1677 | 1.610926 | -19   | 3247.27  | 40  | 7  | 6  |
| 314.9075 | -0.01238 | -5.5  | 4991.72  | 13  | 2  | 10 |
| 316.8989 | -1.14831 | -2    | 86121.06 | 6   | 11 | 5  |
| 316.9409 | 0.744934 | -63.5 | 10638.62 | 129 | 10 | 1  |
| 318.9146 | -0.98428 | -3    | 49841.9  | 8   | 11 | 5  |
| 318.9773 | 2.244992 | -8    | 18616.73 | 18  | 7  | 7  |
| 321.153  | -1.10197 | -19.5 | 2471.43  | 41  | 4  | 8  |
| 323.1684 | -1.86868 | -20.5 | 29233.22 | 43  | 4  | 8  |
| 323.7786 | -1.32467 | 1     | 2130.99  | 0   | 0  | 12 |
| 324.9041 | 0.880568 | -62   | 3430.59  | 126 | 9  | 2  |
| 326.9199 | 1.333968 | -63   | 5664.87  | 128 | 9  | 2  |
| 327.1798 | -0.7149  | -79   | 25940.16 | 160 | 7  | 2  |
| 329.0854 | -0.81711 | -15.5 | 1705.15  | 33  | 5  | 8  |
| 331.8862 | -0.46371 | -1.5  | 2805.83  | 5   | 12 | 5  |
| 332.9358 | 0.664092 | -63.5 | 1850.93  | 129 | 11 | 1  |
| 333.9018 | -0.61066 | -2.5  | 1722.55  | 7   | 12 | 5  |
| 334.8652 | 0.286981 | -4.5  | 2857.95  | 11  | 0  | 12 |
| 334.9098 | -0.08629 | -3    | 1340626  | 8   | 12 | 5  |
| 338.1877 | 2.2801   | -22.5 | 2243.7   | 47  | 3  | 9  |
| 340.203  | 1.237792 | -23.5 | 91269.14 | 49  | 3  | 9  |
| 342.9146 | 0.644767 | -63   | 49945.41 | 128 | 10 | 2  |
| 344.9303 | 0.785957 | -64   | 5542.95  | 130 | 10 | 2  |
| 344.9567 | -1.57672 | -5.5  | 1709.57  | 13  | 14 | 4  |
| 346.898  | 1.920165 | -5.5  | 1713.31  | 13  | 4  | 10 |
| 348.8861 | 0.949021 | -65   | 3429.6   | 132 | 0  | 8  |
| 349.8966 | -0.91141 | -2.5  | 27254.5  | 7   | 13 | 5  |
| 350.7602 | -1.05171 | 1     | 51917.75 | 0   | 0  | 13 |
| 352.8757 | 0.088133 | -5.5  | 35307.89 | 13  | 1  | 12 |
| 352.9201 | -0.83277 | -4    | 40186.92 | 10  | 13 | 5  |
| 353.2155 | 0.229605 | -83.5 | 2991.85  | 169 | 3  | 5  |
| 358.9097 | 1.131484 | -63   | 7517.81  | 128 | 11 | 2  |
| 360.9253 | 0.986632 | -64   | 2416.75  | 130 | 11 | 2  |
| 361.0065 | -1.06341 | -12.5 | 4500.14  | 27  | 4  | 10 |
| 364.854  | 2.264198 | 0.5   | 2284.31  | 1   | 16 | 4  |
| 367.9073 | -0.49985 | -3.5  | 5101.49  | 9   | 14 | 5  |
| 376.878  | -1.21763 | -2.5  | 62255.23 | 7   | 13 | 6  |
| 376.9201 | 0.639659 | -64   | 2396.32  | 130 | 12 | 2  |
| 376.977  | -2.41102 | -8    | 4376.94  | 18  | 14 | 5  |
| 378.8938 | -0.81527 | -3.5  | 6509.01  | 9   | 13 | 6  |
| 380.8102 | -0.28597 | 1     | 13134.39 | 0   | 12 | 7  |
| 390.9117 | -1.91577 | -8.5  | 3025.44  | 19  | 3  | 12 |
| 390.9926 | 2.483685 | -70.5 | 37688.26 | 143 | 7  | 5  |
| 391.9959 | 0.168624 | -10   | 2669.14  | 22  | 13 | 6  |
| 392.9421 | 0.282739 | -5.5  | 1797.47  | 13  | 17 | 4  |
| 393.8808 | -1.01274 | -3    | 5938.65  | 8   | 14 | 6  |
| 394.8888 | -0.56699 | -3.5  | 1087778  | 9   | 14 | 6  |

|          |          |       |          |     |    |    |
|----------|----------|-------|----------|-----|----|----|
| 395.8929 | -1.57593 | -67   | 1890.61  | 136 | 1  | 9  |
| 397.2269 | -0.03499 | -25.5 | 3301.21  | 53  | 8  | 8  |
| 399.2426 | 0.090421 | -26.5 | 5782.89  | 55  | 8  | 8  |
| 400.8368 | 0.688809 | -1    | 2540.34  | 4   | 13 | 7  |
| 402.8938 | 0.56119  | -63.5 | 46224.41 | 129 | 12 | 3  |
| 404.7232 | -1.10915 | 1     | 3493.63  | 0   | 0  | 15 |
| 404.7783 | -1.57839 | -56.5 | 3641.25  | 115 | 13 | 3  |
| 404.9099 | 1.669757 | -64.5 | 2043.09  | 131 | 12 | 3  |
| 410.9107 | -1.82253 | -69   | 4008.89  | 140 | 0  | 10 |
| 412.8549 | 0.08744  | -6    | 23628.63 | 14  | 3  | 13 |
| 412.8994 | -0.4575  | -4.5  | 33010.23 | 11  | 15 | 6  |
| 418.8888 | 0.74268  | -63.5 | 3135.5   | 129 | 13 | 3  |
| 420.1835 | -1.42533 | -21.5 | 1561.28  | 45  | 15 | 5  |
| 420.9254 | 2.35458  | -8    | 2205.53  | 18  | 10 | 9  |
| 420.9734 | 1.534779 | -67.5 | 2314.24  | 137 | 16 | 1  |
| 422.878  | -0.91965 | -4    | 2567.98  | 10  | 14 | 7  |
| 434.8689 | -1.41169 | -67.5 | 2382.1   | 137 | 0  | 11 |
| 436.7681 | -1.53147 | -56.5 | 2913.45  | 115 | 15 | 3  |
| 436.8571 | -1.26792 | -3    | 24950.08 | 8   | 15 | 7  |
| 436.8993 | 0.563288 | -64.5 | 3586.29  | 131 | 14 | 3  |
| 438.8729 | -0.92031 | -4    | 24098.95 | 10  | 15 | 7  |
| 438.936  | 2.337704 | -9    | 2606.05  | 20  | 11 | 9  |
| 444.8628 | 1.339965 | -63   | 3079.37  | 128 | 13 | 4  |
| 446.8784 | 1.222034 | -64   | 2728.54  | 130 | 13 | 4  |
| 450.8465 | -2.18233 | -61   | 7394.06  | 124 | 17 | 2  |
| 452.8795 | -1.27826 | -68.5 | 23665.13 | 139 | 1  | 11 |
| 454.868  | -0.48124 | -4    | 733576.5 | 10  | 16 | 7  |
| 456.8836 | -0.58855 | -5    | 5443.52  | 12  | 16 | 7  |
| 458.6863 | -0.93506 | 1     | 1977.8   | 0   | 0  | 17 |
| 462.8731 | 0.715315 | -64   | 29426.72 | 130 | 14 | 4  |
| 464.8464 | -1.33141 | -3.5  | 2200.82  | 9   | 15 | 8  |
| 464.8885 | 0.17445  | -65   | 1585.85  | 132 | 14 | 4  |
| 472.8341 | 0.086923 | -6.5  | 5342.63  | 15  | 5  | 14 |
| 472.8784 | -0.81184 | -5    | 314998.5 | 12  | 17 | 7  |
| 476.8374 | -1.56007 | -67   | 3615.09  | 136 | 1  | 12 |
| 478.8255 | -1.63713 | -2.5  | 12168.34 | 7   | 16 | 8  |
| 478.8682 | 1.077751 | -64   | 2992.68  | 130 | 15 | 4  |
| 480.8415 | -0.90238 | -3.5  | 16318.35 | 9   | 16 | 8  |
| 480.8835 | 0.345406 | -65   | 16139.15 | 132 | 15 | 4  |
| 486.8231 | -1.6205  | -64.5 | 2477.15  | 131 | 7  | 9  |
| 490.8446 | -0.04869 | -7.5  | 4459.35  | 17  | 6  | 14 |
| 494.8477 | -2.0388  | -68   | 1556.51  | 138 | 2  | 12 |
| 494.8784 | -2.31147 | -70.5 | 1621.41  | 143 | 0  | 13 |
| 495.8287 | -0.65325 | -3    | 12089.7  | 8   | 17 | 8  |
| 496.8366 | -0.50097 | -3.5  | 341243.3 | 9   | 17 | 8  |
| 496.8785 | 0.505355 | -65   | 2344.72  | 132 | 16 | 4  |

|          |          |       |          |     |    |    |
|----------|----------|-------|----------|-----|----|----|
| 498.8523 | -0.39872 | -4.5  | 4357.32  | 11  | 17 | 8  |
| 503.1381 | 1.343768 | -24.5 | 3592.69  | 51  | 8  | 12 |
| 504.8417 | 0.596425 | -63.5 | 19519.03 | 129 | 15 | 5  |
| 511.8235 | -0.85752 | -3    | 8127.86  | 8   | 18 | 8  |
| 512.6489 | -1.77295 | 1     | 1867.35  | 0   | 0  | 19 |
| 512.8584 | -1.70398 | -69   | 26787.39 | 140 | 3  | 12 |
| 514.8026 | -0.17269 | -6    | 6929.98  | 14  | 6  | 15 |
| 514.8346 | 2.09019  | -8.5  | 41063.77 | 19  | 4  | 16 |
| 514.847  | -0.80393 | -4.5  | 143334.2 | 11  | 18 | 8  |
| 519.1491 | -1.44255 | -81.5 | 7266.41  | 165 | 17 | 3  |
| 520.1519 | 2.251463 | -84   | 2472.89  | 170 | 10 | 7  |
| 520.8364 | 0.165311 | -63.5 | 2349.5   | 129 | 16 | 5  |
| 522.852  | 0.069044 | -64.5 | 7139.5   | 131 | 16 | 5  |
| 532.8451 | 1.897553 | -9.5  | 4832.82  | 21  | 5  | 16 |
| 532.8575 | -0.89874 | -5.5  | 49580.92 | 13  | 19 | 8  |
| 538.8044 | -2.00239 | -3    | 4106.47  | 8   | 18 | 9  |
| 540.8205 | -1.16286 | -4    | 4869.56  | 10  | 18 | 9  |
| 550.868  | -0.98735 | -6.5  | 1618.11  | 15  | 20 | 8  |
| 554.8116 | 1.155529 | -62   | 3299.58  | 126 | 20 | 4  |
| 554.827  | -1.62915 | -68.5 | 16224.14 | 139 | 4  | 13 |
| 556.8035 | 2.417555 | -8    | 7175.95  | 18  | 5  | 17 |
| 556.8155 | -0.9768  | -4    | 67832.97 | 10  | 19 | 9  |
| 558.8311 | -1.06275 | -5    | 1945.4   | 12  | 19 | 9  |
| 564.821  | 0.718989 | -64   | 2596.35  | 130 | 17 | 6  |
| 566.6124 | -1.86    | -49.5 | 1597.33  | 101 | 24 | 3  |
| 566.6124 | -0.86285 | 1     | 1597.33  | 0   | 0  | 21 |
| 570.7927 | 1.254573 | -66   | 2023.35  | 134 | 7  | 12 |
| 570.8046 | -2.23176 | -62   | 52757.65 | 126 | 21 | 4  |
| 574.8141 | 2.402696 | -9    | 3334.66  | 20  | 6  | 17 |
| 574.8262 | -0.71134 | -5    | 152035.5 | 12  | 20 | 9  |
| 576.8307 | -2.23445 | -71   | 2347.48  | 144 | 0  | 16 |
| 576.8418 | -0.79554 | -6    | 1859.49  | 14  | 20 | 9  |
| 582.8313 | 0.242094 | -65   | 10533.82 | 132 | 18 | 6  |
| 592.8369 | -0.46202 | -6    | 473484.2 | 14  | 21 | 9  |
| 594.8411 | -2.44418 | -72   | 11451.41 | 146 | 1  | 16 |
| 598.11   | 0.578656 | -83   | 7906.48  | 168 | 15 | 7  |
| 598.7719 | 1.863985 | -7.5  | 8138.63  | 17  | 6  | 18 |
| 598.7835 | -1.96047 | -3.5  | 2486.63  | 9   | 20 | 10 |
| 600.7994 | -1.53778 | -4.5  | 1715.84  | 11  | 20 | 10 |
| 600.8419 | 0.293089 | -66   | 24342.64 | 134 | 19 | 6  |
| 602.8042 | -2.49483 | -70.5 | 8650.9   | 143 | 0  | 17 |
| 614.8061 | -1.62474 | -69   | 23534.69 | 140 | 6  | 14 |
| 616.7825 | 1.866302 | -8.5  | 7165.81  | 19  | 7  | 18 |
| 616.7948 | -0.71158 | -4.5  | 94714.97 | 11  | 21 | 10 |
| 618.8101 | -1.27486 | -5.5  | 1972.34  | 13  | 21 | 10 |
| 624.7995 | -0.46239 | -64.5 | 2272.9   | 131 | 19 | 7  |

|          |          |       |          |     |    |    |
|----------|----------|-------|----------|-----|----|----|
| 630.7837 | -2.17015 | -62.5 | 56721.14 | 127 | 23 | 5  |
| 631.7817 | -0.99544 | -4    | 1743.03  | 10  | 22 | 10 |
| 634.8055 | -0.47873 | -5.5  | 121932.7 | 13  | 22 | 10 |
| 636.81   | -1.85911 | -71.5 | 2847.78  | 145 | 2  | 17 |
| 640.7522 | -1.72282 | -3    | 3742.27  | 8   | 21 | 11 |
| 642.8105 | 0.227283 | -65.5 | 4737.88  | 133 | 20 | 7  |
| 644.7726 | 2.048944 | -59.5 | 4441.15  | 121 | 31 | 1  |
| 648.7942 | -2.2101  | -63.5 | 7499.56  | 129 | 24 | 5  |
| 648.7942 | -1.33925 | -13   | 7499.56  | 28  | 0  | 23 |
| 649.7926 | -0.4523  | -5    | 4745.4   | 12  | 23 | 10 |
| 652.7714 | -0.37364 | -8    | 2414.52  | 18  | 11 | 17 |
| 652.8161 | -0.41191 | -6.5  | 57372.26 | 15  | 23 | 10 |
| 656.7729 | 1.204527 | -7.5  | 1733.43  | 17  | 13 | 16 |
| 658.7513 | 1.147779 | -58.5 | 4929.29  | 119 | 32 | 1  |
| 658.7513 | 2.005465 | -8    | 4929.29  | 18  | 8  | 19 |
| 658.7634 | -0.71179 | -4    | 82697.02 | 10  | 22 | 11 |
| 660.7787 | -1.23929 | -5    | 2804.9   | 12  | 22 | 11 |
| 663.1981 | 2.27851  | -89   | 2994.34  | 180 | 20 | 6  |
| 666.7684 | -0.02835 | -64   | 2049.16  | 130 | 20 | 8  |
| 672.7525 | -1.78208 | -62   | 2325.56  | 126 | 24 | 6  |
| 672.7525 | -0.94225 | -11.5 | 2325.56  | 25  | 0  | 24 |
| 674.7855 | -1.17652 | -69.5 | 7444.77  | 141 | 8  | 15 |
| 676.7739 | -0.78889 | -5    | 158328.5 | 12  | 23 | 11 |
| 678.7784 | 2.417732 | -60.5 | 1787.86  | 123 | 33 | 1  |
| 678.7784 | -2.083   | -71   | 1787.86  | 144 | 3  | 18 |
| 684.779  | 0.023511 | -65   | 3938.77  | 132 | 21 | 8  |
| 690.763  | -1.82971 | -63   | 25286.2  | 128 | 25 | 6  |
| 690.763  | -1.01178 | -12.5 | 25286.2  | 27  | 1  | 24 |
| 691.2296 | -0.74346 | -37.5 | 2550.31  | 77  | 8  | 18 |
| 692.7955 | -1.96147 | -70.5 | 1554.2   | 143 | 9  | 15 |
| 694.7845 | -0.71806 | -6    | 199984   | 14  | 24 | 11 |
| 696.7887 | 1.974921 | -61.5 | 5090.96  | 125 | 34 | 1  |
| 696.7887 | -2.40948 | -72   | 5090.96  | 146 | 4  | 18 |
| 702.7896 | 0.07271  | -66   | 6189.19  | 134 | 22 | 8  |
| 708.7735 | -1.87493 | -64   | 2127.22  | 130 | 26 | 6  |
| 708.7735 | -1.07778 | -13.5 | 2127.22  | 29  | 2  | 24 |
| 712.795  | -0.79111 | -7    | 73770.21 | 16  | 25 | 11 |
| 716.7534 | -2.12611 | -69   | 2005.94  | 140 | 9  | 16 |
| 718.7426 | -0.64543 | -4.5  | 16000.37 | 11  | 24 | 12 |
| 722.7618 | 1.053045 | -61   | 1607.32  | 124 | 34 | 2  |
| 722.7618 | 1.834771 | -10.5 | 1607.32  | 23  | 10 | 20 |
| 732.7311 | -2.44823 | -62.5 | 8359.36  | 127 | 26 | 7  |
| 732.7311 | 2.492189 | -1.5  | 8359.36  | 5   | 32 | 8  |
| 732.7311 | -1.67715 | -12   | 8359.36  | 26  | 2  | 25 |
| 734.7645 | -1.34587 | -70   | 5654.86  | 142 | 10 | 16 |
| 736.741  | 0.944838 | -60   | 3632.61  | 122 | 35 | 2  |

|          |          |       |          |     |    |    |
|----------|----------|-------|----------|-----|----|----|
| 736.741  | 1.711731 | -9.5  | 3632.61  | 21  | 11 | 20 |
| 736.7532 | -0.58215 | -5.5  | 48166.19 | 13  | 25 | 12 |
| 750.7421 | -1.81007 | -63.5 | 21860.15 | 129 | 27 | 7  |
| 750.7421 | -1.05749 | -13   | 21860.15 | 28  | 3  | 25 |
| 752.7744 | -2.19707 | -71   | 2090.45  | 144 | 11 | 16 |
| 754.7515 | 0.83617  | -61   | 1615.77  | 124 | 36 | 2  |
| 754.7515 | 1.584763 | -10.5 | 1615.77  | 23  | 12 | 20 |
| 754.7636 | -0.78687 | -6.5  | 48259.7  | 15  | 26 | 12 |
| 760.7093 | 1.223991 | -67   | 5436.34  | 136 | 12 | 16 |
| 764.7312 | 2.002145 | -60.5 | 1520.84  | 123 | 35 | 3  |
| 764.7312 | -1.99272 | -71   | 1520.84  | 144 | 5  | 20 |
| 768.7524 | -2.11238 | -64.5 | 9037.25  | 131 | 28 | 7  |
| 768.7524 | -1.37742 | -14   | 9037.25  | 30  | 4  | 25 |
| 772.7741 | -0.85264 | -7.5  | 16513.84 | 17  | 27 | 12 |
| 778.7214 | -1.10296 | -5    | 43712.09 | 12  | 26 | 13 |
| 782.9308 | -1.77397 | -74.5 | 2395.38  | 151 | 31 | 5  |
| 782.9308 | -1.05233 | -24   | 2395.38  | 50  | 7  | 23 |
| 792.7105 | -2.00438 | -63   | 7411.53  | 128 | 28 | 8  |
| 792.7105 | -1.29164 | -12.5 | 7411.53  | 27  | 4  | 26 |
| 796.7319 | -1.15961 | -6    | 166162.3 | 14  | 27 | 13 |
| 798.736  | 1.06556  | -61.5 | 3684.13  | 125 | 37 | 3  |
| 798.736  | 1.772929 | -11   | 3684.13  | 24  | 13 | 21 |
| 804.7375 | 0.156697 | -66   | 3545.97  | 134 | 25 | 10 |
| 804.7375 | 0.85879  | -15.5 | 3545.97  | 33  | 1  | 28 |
| 805.6601 | 0.572326 | -57   | 6704.97  | 116 | 38 | 3  |
| 805.6601 | 1.273616 | -6.5  | 6704.97  | 15  | 14 | 21 |
| 806.6627 | -1.08335 | -70   | 1712.3   | 142 | 1  | 24 |
| 810.7213 | -1.66999 | -64   | 8319.18  | 130 | 29 | 8  |
| 810.7213 | -0.97308 | -13.5 | 8319.18  | 29  | 5  | 26 |
| 814.7425 | -1.09102 | -7    | 85343.27 | 16  | 28 | 13 |
| 820.6886 | 1.262478 | -67.5 | 1622.74  | 137 | 14 | 17 |
| 822.7475 | -0.53346 | -67   | 3739.08  | 136 | 26 | 10 |
| 822.7475 | 0.153267 | -16.5 | 3739.08  | 35  | 2  | 28 |
| 828.7317 | -1.8328  | -65   | 2281.57  | 132 | 30 | 8  |
| 828.7317 | -1.15103 | -14.5 | 2281.57  | 31  | 6  | 26 |
| 832.753  | -1.14548 | -8    | 47756.77 | 18  | 29 | 13 |
| 833.6908 | 1.152827 | -68.5 | 19895.85 | 139 | 13 | 18 |
| 834.6943 | -0.37008 | -58.5 | 9660.89  | 119 | 43 | 1  |
| 834.6943 | 0.306819 | -8    | 9660.89  | 18  | 19 | 19 |
| 836.7122 | 2.319919 | -59.5 | 2451.36  | 121 | 43 | 1  |
| 836.7122 | -1.33128 | -70   | 2451.36  | 142 | 13 | 18 |
| 838.7012 | -0.30273 | -5.5  | 18205.62 | 13  | 28 | 14 |
| 852.6897 | -1.85753 | -63.5 | 12964.92 | 129 | 30 | 9  |
| 852.6897 | 2.387861 | -2.5  | 12964.92 | 7   | 36 | 10 |
| 852.6897 | -1.19492 | -13   | 12964.92 | 28  | 6  | 27 |
| 854.7226 | 2.077988 | -60.5 | 2193.17  | 123 | 44 | 1  |



|          |          |       |          |     |    |    |
|----------|----------|-------|----------|-----|----|----|
| 854.7226 | -1.49627 | -71   | 2193.17  | 144 | 14 | 18 |
| 856.6984 | -0.34306 | -61   | 1835.08  | 124 | 39 | 4  |
| 856.6984 | 0.316448 | -10.5 | 1835.08  | 23  | 15 | 22 |
| 856.7115 | -0.60569 | -6.5  | 29082.96 | 15  | 29 | 14 |
| 861.7225 | -1.65819 | -67.5 | 16151.86 | 137 | 25 | 12 |
| 861.7225 | -1.00253 | -17   | 16151.86 | 36  | 1  | 30 |
| 862.7265 | -1.89388 | -7    | 10341.58 | 16  | 31 | 13 |
| 862.7265 | 1.960185 | -70   | 10341.58 | 142 | 18 | 16 |
| 870.6999 | -2.23831 | -64.5 | 10686.7  | 131 | 31 | 9  |
| 870.6999 | 1.919264 | -3.5  | 10686.7  | 9   | 37 | 10 |
| 870.6999 | -1.58941 | -14   | 10686.7  | 30  | 7  | 27 |
| 874.7219 | -0.78185 | -7.5  | 21714.19 | 17  | 30 | 14 |
| 880.6688 | -1.45787 | -5    | 13205.71 | 12  | 29 | 15 |
| 880.6688 | 2.317676 | -68   | 13205.71 | 138 | 16 | 18 |
| 888.7111 | -1.47843 | -65.5 | 2627.37  | 133 | 32 | 9  |
| 888.7111 | -0.84268 | -15   | 2627.37  | 32  | 8  | 27 |
| 889.7542 | -0.22354 | -5.5  | 3427.01  | 13  | 43 | 7  |
| 889.7542 | 0.07991  | -79   | 3427.01  | 160 | 0  | 27 |
| 890.7576 | -1.45819 | -69   | 2136.35  | 140 | 30 | 10 |
| 890.7576 | -0.8239  | -18.5 | 2136.35  | 39  | 6  | 28 |
| 892.7327 | -0.50284 | -8.5  | 4653.6   | 19  | 31 | 14 |
| 898.6795 | -1.27843 | -6    | 46504.7  | 14  | 30 | 15 |
| 898.6795 | 2.421448 | -69   | 46504.7  | 140 | 17 | 18 |
| 912.6681 | 1.359861 | -3    | 4785.81  | 8   | 38 | 11 |
| 912.6681 | -1.98747 | -13.5 | 4785.81  | 29  | 8  | 28 |
| 916.6901 | -1.21513 | -7    | 92431.71 | 16  | 31 | 15 |
| 916.6901 | 2.412053 | -70   | 92431.71 | 142 | 18 | 18 |
| 918.6945 | 1.04616  | -62.5 | 1933.54  | 127 | 41 | 5  |
| 918.6945 | -2.27921 | -73   | 1933.54  | 148 | 11 | 22 |
| 918.6945 | 1.661164 | -12   | 1933.54  | 26  | 17 | 23 |
| 930.6793 | -1.87379 | -65   | 4280.68  | 132 | 33 | 10 |
| 930.6793 | 2.015843 | -4    | 4280.68  | 10  | 39 | 11 |
| 930.6793 | -1.26671 | -14.5 | 4280.68  | 31  | 9  | 28 |
| 934.7007 | -1.15427 | -8    | 54620.55 | 18  | 32 | 15 |
| 934.7007 | 2.403021 | -71   | 54620.55 | 144 | 19 | 18 |
| 940.6472 | -2.21007 | -5.5  | 2528.65  | 13  | 31 | 16 |
| 940.6472 | 1.324728 | -68.5 | 2528.65  | 139 | 18 | 19 |
| 952.7115 | -0.88579 | -9    | 13503.7  | 20  | 33 | 15 |
| 954.6363 | 0.849644 | -2.5  | 1932.2   | 7   | 39 | 12 |
| 954.6363 | -2.35052 | -13   | 1932.2   | 28  | 9  | 29 |
| 958.6593 | -0.56735 | -6.5  | 11926.17 | 15  | 32 | 16 |
| 972.6473 | -2.44065 | -64.5 | 6835.33  | 131 | 34 | 11 |
| 972.6473 | 1.281144 | -3.5  | 6835.33  | 9   | 40 | 12 |
| 972.6473 | -1.85977 | -14   | 6835.33  | 30  | 10 | 29 |
| 976.6697 | -0.72583 | -7.5  | 14488.9  | 17  | 33 | 16 |
| 982.6166 | -1.33205 | -5    | 2994.6   | 12  | 32 | 17 |

|          |          |       |          |     |    |    |
|----------|----------|-------|----------|-----|----|----|
| 982.6166 | 2.051771 | -68   | 2994.6   | 138 | 19 | 20 |
| 990.6581 | -2.15907 | -65.5 | 6748.9   | 133 | 35 | 11 |
| 990.6581 | 1.495069 | -4.5  | 6748.9   | 11  | 41 | 12 |
| 990.6581 | -1.58874 | -15   | 6748.9   | 32  | 11 | 29 |
| 994.6799 | -1.07964 | -8.5  | 4559.81  | 19  | 34 | 16 |
| 994.6799 | 2.263145 | -71.5 | 4559.81  | 145 | 21 | 19 |
| 1000.627 | -1.77279 | -6    | 20101.58 | 14  | 33 | 17 |
| 1000.627 | 1.550131 | -69   | 20101.58 | 140 | 20 | 20 |
| 1008.668 | 0.908228 | -5.5  | 1855.88  | 13  | 42 | 12 |
| 1008.668 | -2.12051 | -16   | 1855.88  | 34  | 12 | 29 |
| 1018.638 | -1.3144  | -7    | 56745.63 | 16  | 34 | 17 |
| 1018.638 | 1.949765 | -70   | 56745.63 | 142 | 21 | 20 |
| 1032.627 | -2.10037 | -65   | 2121.67  | 132 | 36 | 12 |
| 1032.627 | 1.405253 | -4    | 2121.67  | 10  | 42 | 13 |
| 1032.627 | -1.55322 | -14.5 | 2121.67  | 31  | 12 | 30 |
| 1036.648 | -1.35427 | -8    | 51168.79 | 18  | 35 | 17 |
| 1036.648 | 1.853188 | -71   | 51168.79 | 144 | 22 | 20 |
| 1038.573 | 0.241774 | -1.5  | 1823.71  | 5   | 41 | 14 |
| 1040.607 | 1.240719 | -59.5 | 1916.97  | 121 | 49 | 5  |
| 1040.607 | -1.69507 | -70   | 1916.97  | 142 | 19 | 22 |
| 1040.607 | 1.783673 | -9    | 1916.97  | 20  | 25 | 23 |
| 1054.658 | -1.86686 | -9    | 10774.39 | 20  | 36 | 17 |
| 1054.658 | 1.285821 | -72   | 10774.39 | 146 | 23 | 20 |
| 1056.584 | 0.744002 | -2.5  | 3066.42  | 7   | 42 | 14 |
| 1056.584 | -2.14739 | -13   | 3066.42  | 28  | 12 | 31 |
| 1060.606 | -1.85639 | -6.5  | 4709.2   | 15  | 35 | 18 |
| 1060.606 | 1.278611 | -69.5 | 4709.2   | 141 | 22 | 21 |
| 1074.597 | -0.92956 | -64.5 | 4204.08  | 131 | 37 | 13 |
| 1074.597 | 2.439154 | -3.5  | 4204.08  | 9   | 43 | 14 |
| 1074.597 | -0.40378 | -14   | 4204.08  | 30  | 13 | 31 |
| 1078.618 | 0.061282 | -7.5  | 16474.9  | 17  | 36 | 18 |
| 1080.545 | 0.001018 | -62   | 1775.88  | 126 | 36 | 14 |
| 1080.545 | 0.523903 | -11.5 | 1775.88  | 25  | 12 | 32 |
| 1084.566 | -0.64441 | -55.5 | 80878.64 | 113 | 59 | 1  |
| 1084.566 | -0.12346 | -5    | 80878.64 | 12  | 35 | 19 |
| 1086.571 | -0.10483 | -71   | 1535.24  | 144 | 15 | 26 |
| 1092.607 | -1.2483  | -65.5 | 1648.47  | 133 | 38 | 13 |
| 1092.607 | 2.064883 | -4.5  | 1648.47  | 11  | 44 | 14 |
| 1092.607 | -0.73119 | -15   | 1648.47  | 32  | 14 | 31 |
| 1092.607 | 2.311999 | -78   | 1648.47  | 158 | 1  | 34 |
| 1102.575 | -1.32771 | -56.5 | 21976.82 | 115 | 60 | 1  |
| 1102.575 | -0.81527 | -6    | 21976.82 | 14  | 36 | 19 |
| 1102.575 | 2.200399 | -69   | 21976.82 | 140 | 23 | 22 |
| 1120.586 | -1.00742 | -57.5 | 36511.15 | 117 | 61 | 1  |
| 1120.586 | -0.50322 | -7    | 36511.15 | 16  | 37 | 19 |
| 1120.586 | 2.463984 | -70   | 36511.15 | 142 | 24 | 22 |

(b)

i. Sulfonated species 'dull side'

| Total ion counts |                 | 65318098 |           |                            |    |    |   |   |
|------------------|-----------------|----------|-----------|----------------------------|----|----|---|---|
| Mass             | Deviation (ppm) | DBE      | Area (AU) | Area (normalised to total) | H  | C  | O | S |
| 79.9571          | -3.313015634    | 1        | 1410502   | 0.021594359                | 0  | 0  | 3 | 1 |
| 80.9649          | -3.580551103    | 0.5      | 60736.96  | 0.000929864                | 1  | 0  | 3 | 1 |
| 93.0012          | -4.031114531    | 0.5      | 4341.78   | 6.64713E-05                | 5  | 2  | 2 | 1 |
| 94.9806          | -2.525772569    | 0.5      | 1823.17   | 2.79122E-05                | 3  | 1  | 3 | 1 |
| 106.9809         | 0.561782839     | 1.5      | 4474.98   | 6.85106E-05                | 3  | 2  | 3 | 1 |
| 154.9807         | -0.90269223     | 5.5      | 7529.78   | 0.000115279                | 3  | 6  | 3 | 1 |
| 155.9885         | -1.057128094    | 5        | 21774.88  | 0.000333367                | 4  | 6  | 3 | 1 |
| 156.9964         | -0.572624268    | 4.5      | 184933.2  | 0.002831271                | 5  | 6  | 3 | 1 |
| 170.0043         | -0.087644834    | 5        | 457859.3  | 0.007009685                | 6  | 7  | 3 | 1 |
| 171.0121         | -0.233316769    | 4.5      | 3294.94   | 5.04445E-05                | 7  | 7  | 3 | 1 |
| 180.9966         | 0.608299089     | 6.5      | 186107.8  | 0.002849253                | 5  | 8  | 3 | 1 |
| 182.0042         | -0.631303714    | 6        | 3418.3    | 5.23331E-05                | 6  | 8  | 3 | 1 |
| 183.012          | -0.764430163    | 5.5      | 16487489  | 0.252418393                | 7  | 8  | 3 | 1 |
| 185.0274         | -2.107251026    | 4.5      | 10200.43  | 0.000156165                | 9  | 8  | 3 | 1 |
| 194.0041         | -1.107707322    | 7        | 9953      | 0.000152377                | 6  | 9  | 3 | 1 |
| 195.0121         | -0.204602647    | 6.5      | 1046453   | 0.016020872                | 7  | 9  | 3 | 1 |
| 196.0199         | -0.331088724    | 6        | 216077.5  | 0.00330808                 | 8  | 9  | 3 | 1 |
| 197.0277         | -0.456280812    | 5.5      | 1179238   | 0.018053764                | 9  | 9  | 3 | 1 |
| 198.0354         | -1.085158344    | 5        | 21783.01  | 0.000333491                | 10 | 9  | 3 | 1 |
| 199.0433         | -0.702861647    | 4.5      | 5890.7    | 9.01848E-05                | 11 | 9  | 3 | 1 |
| 220.0198         | -0.74947744     | 8        | 6971.02   | 0.000106724                | 8  | 11 | 3 | 1 |
| 221.0276         | -0.859167981    | 7.5      | 56598.33  | 0.000866503                | 9  | 11 | 3 | 1 |
| 223.0433         | -0.627232077    | 6.5      | 63655.04  | 0.000974539                | 11 | 11 | 3 | 1 |
| 225.0591         | 0.044877103     | 5.5      | 161277.1  | 0.002469103                | 13 | 11 | 3 | 1 |
| 227.0746         | -0.616096709    | 4.5      | 5045.03   | 7.72379E-05                | 15 | 11 | 3 | 1 |
| 233.0276         | -0.814924263    | 8.5      | 8708.8    | 0.000133329                | 9  | 12 | 3 | 1 |
| 235.0432         | -1.020662394    | 7.5      | 12561.1   | 0.000192307                | 11 | 12 | 3 | 1 |
| 237.059          | -0.379230343    | 6.5      | 19805.2   | 0.000303212                | 13 | 12 | 3 | 1 |
| 239.0747         | -0.166893416    | 5.5      | 169418.7  | 0.002593749                | 15 | 12 | 3 | 1 |
| 241.0902         | -0.78767138     | 4.5      | 2222.52   | 3.40261E-05                | 17 | 12 | 3 | 1 |
| 247.0432         | -0.971084276    | 8.5      | 3510.43   | 5.37436E-05                | 11 | 13 | 3 | 1 |
| 249.0589         | -0.762469662    | 7.5      | 2523.48   | 3.86337E-05                | 13 | 13 | 3 | 1 |
| 250.9813         | 1.833207667     | 13.5     | 2284.82   | 3.49799E-05                | 3  | 14 | 3 | 1 |
| 251.0745         | -0.955492377    | 6.5      | 6193.21   | 9.48161E-05                | 15 | 13 | 3 | 1 |
| 253.0902         | -0.750324815    | 5.5      | 63732.73  | 0.000975729                | 17 | 13 | 3 | 1 |
| 255.106          | -0.156405548    | 4.5      | 4814.29   | 7.37053E-05                | 19 | 13 | 3 | 1 |
| 265.0902         | -0.716359428    | 6.5      | 3934.13   | 6.02303E-05                | 17 | 14 | 3 | 1 |
| 267.1058         | -0.898145172    | 5.5      | 35113.34  | 0.000537574                | 19 | 14 | 3 | 1 |
| 269.1215         | -0.705628744    | 4.5      | 4592.12   | 7.03039E-05                | 21 | 14 | 3 | 1 |
| 273.0016         | 0.091940861     | 15.5     | 1713.35   | 2.62309E-05                | 5  | 17 | 2 | 1 |
| 279.1057         | -1.217816713    | 6.5      | 2035.94   | 3.11696E-05                | 19 | 15 | 3 | 1 |

|          |              |      |          |             |    |    |   |   |
|----------|--------------|------|----------|-------------|----|----|---|---|
| 281.0281 | 1.103449592  | 12.5 | 11803.52 | 0.000180708 | 9  | 16 | 3 | 1 |
| 281.1215 | -0.675508176 | 5.5  | 26750    | 0.000409534 | 21 | 15 | 3 | 1 |
| 283.1371 | -0.84729199  | 4.5  | 9159.3   | 0.000140226 | 23 | 15 | 3 | 1 |
| 293.1216 | -0.306698559 | 6.5  | 2488.22  | 3.80939E-05 | 21 | 16 | 3 | 1 |
| 295.137  | -1.151667221 | 5.5  | 30857.55 | 0.00047242  | 23 | 16 | 3 | 1 |
| 297.1528 | -0.639064746 | 4.5  | 492311.7 | 0.007537141 | 25 | 16 | 3 | 1 |
| 307.1371 | -0.781083798 | 6.5  | 1980.87  | 3.03265E-05 | 23 | 17 | 3 | 1 |
| 309.1528 | -0.614258979 | 5.5  | 41137.21 | 0.000629798 | 25 | 17 | 3 | 1 |
| 311.1686 | -0.128226289 | 4.5  | 1402522  | 0.021472181 | 27 | 17 | 3 | 1 |
| 335.1687 | 0.179312719  | 6.5  | 1569.71  | 2.40318E-05 | 27 | 19 | 3 | 1 |
| 337.1842 | -0.266619777 | 5.5  | 16850.5  | 0.000257976 | 29 | 19 | 3 | 1 |
| 339.1998 | -0.412441111 | 4.5  | 630590.6 | 0.009654148 | 31 | 19 | 3 | 1 |

## ii. Sulfonates on 'shiny' side

| Total ion counts |                 | 13252804 |           |                            |    |    |   |   |
|------------------|-----------------|----------|-----------|----------------------------|----|----|---|---|
| Mass             | Deviation (ppm) | DBE      | Area (AU) | Area (normalised to total) | H  | C  | O | S |
| 79.957           | -4.56368        | 1        | 405941.7  | 0.03063063                 | 0  | 0  | 3 | 1 |
| 80.9648          | -4.81565        | 0.5      | 8469.62   | 0.000639081                | 1  | 0  | 3 | 1 |
| 155.9885         | -1.05713        | 5        | 1193.58   | 9.00625E-05                | 4  | 6  | 3 | 1 |
| 156.9963         | -1.20958        | 4.5      | 9213.94   | 0.000695245                | 5  | 6  | 3 | 1 |
| 170.0042         | -0.67587        | 5        | 35700.8   | 0.00269383                 | 6  | 7  | 3 | 1 |
| 180.9963         | -1.04919        | 6.5      | 11106.82  | 0.000838073                | 5  | 8  | 3 | 1 |
| 183.012          | -0.76443        | 5.5      | 2163489   | 0.163247657                | 7  | 8  | 3 | 1 |
| 184.0197         | -1.43952        | 5        | 34155.49  | 0.002577227                | 8  | 8  | 3 | 1 |
| 195.012          | -0.71739        | 6.5      | 102706.8  | 0.007749815                | 7  | 9  | 3 | 1 |
| 196.0198         | -0.84124        | 6        | 14610.44  | 0.001102441                | 8  | 9  | 3 | 1 |
| 197.0277         | -0.45628        | 5.5      | 119683.7  | 0.009030824                | 9  | 9  | 3 | 1 |
| 198.0354         | -1.08516        | 5        | 1338.89   | 0.000101027                | 10 | 9  | 3 | 1 |
| 207.012          | -0.67581        | 7.5      | 8764.75   | 0.000661351                | 7  | 10 | 3 | 1 |
| 209.0276         | -0.90849        | 6.5      | 23687.29  | 0.001787342                | 9  | 10 | 3 | 1 |
| 211.0433         | -0.6629         | 5.5      | 9903.8    | 0.000747298                | 11 | 10 | 3 | 1 |
| 221.0277         | -0.40674        | 7.5      | 2308.33   | 0.000174177                | 9  | 11 | 3 | 1 |
| 223.0434         | -0.17889        | 6.5      | 2038.84   | 0.000153842                | 11 | 11 | 3 | 1 |
| 225.0589         | -0.84378        | 5.5      | 13135.47  | 0.000991146                | 13 | 11 | 3 | 1 |
| 239.0746         | -0.58517        | 5.5      | 12771.19  | 0.000963659                | 15 | 12 | 3 | 1 |
| 253.0903         | -0.35521        | 5.5      | 3729.99   | 0.000281449                | 17 | 13 | 3 | 1 |
| 267.1058         | -0.89815        | 5.5      | 1633.07   | 0.000123224                | 19 | 14 | 3 | 1 |
| 281.0282         | 1.459286        | 12.5     | 3408.93   | 0.000257223                | 9  | 16 | 3 | 1 |
| 281.1216         | -0.31979        | 5.5      | 1821.95   | 0.000137477                | 21 | 15 | 3 | 1 |
| 295.137          | -1.15167        | 5.5      | 1895.88   | 0.000143055                | 23 | 16 | 3 | 1 |
| 297.1527         | -0.97559        | 4.5      | 59676.37  | 0.004502924                | 25 | 16 | 3 | 1 |
| 301.1269         | 0.41544         | 8.5      | 4028.46   | 0.00030397                 | 21 | 18 | 2 | 1 |
| 309.1529         | -0.29079        | 5.5      | 2388.25   | 0.000180207                | 25 | 17 | 3 | 1 |
| 311.1684         | -0.77096        | 4.5      | 198286    | 0.014961814                | 27 | 17 | 3 | 1 |
| 323.1684         | -0.74234        | 5.5      | 1451.48   | 0.000109522                | 27 | 18 | 3 | 1 |

|          |          |     |          |             |    |    |   |   |
|----------|----------|-----|----------|-------------|----|----|---|---|
| 325.184  | -0.89149 | 4.5 | 161031   | 0.012150711 | 29 | 18 | 3 | 1 |
| 339.1996 | -1.00206 | 4.5 | 96113.36 | 0.007252304 | 31 | 19 | 3 | 1 |

### iii. Hydrocarbons

| Mass     | Deviation (ppm) | DBE  | Area (AU) | H  | C  |
|----------|-----------------|------|-----------|----|----|
| 133.0086 | 1.699892972     | 11.5 | 62811.9   | 1  | 11 |
| 181.0087 | 1.801574109     | 15.5 | 56127.39  | 1  | 15 |
| 145.0086 | 1.559220298     | 12.5 | 45572.59  | 1  | 12 |
| 115.0553 | -0.207726155    | 6.5  | 27339.38  | 7  | 9  |
| 175.0555 | 1.005967691     | 11.5 | 14052.58  | 7  | 14 |
| 169.0086 | 1.337803535     | 14.5 | 11746.09  | 1  | 14 |
| 159.0242 | 1.107379852     | 12.5 | 11695.77  | 3  | 13 |
| 121.0085 | 1.042076643     | 10.5 | 8921.82   | 1  | 10 |
| 97.0083  | -0.761789906    | 8.5  | 7849.16   | 1  | 8  |
| 157.0085 | 0.803141876     | 13.5 | 7737.51   | 1  | 13 |
| 195.0241 | 0.390208337     | 15.5 | 7076.74   | 3  | 16 |
| 91.0551  | -2.458944633    | 4.5  | 6976.75   | 7  | 7  |
| 147.0242 | 1.197763436     | 11.5 | 6476.88   | 3  | 12 |
| 173.0398 | 0.728734614     | 12.5 | 5951.68   | 5  | 14 |
| 171.0243 | 1.614393076     | 13.5 | 5697.24   | 3  | 14 |
| 89.0394  | -3.076156819    | 5.5  | 5170.44   | 5  | 7  |
| 207.0242 | 0.850625916     | 16.5 | 3869.71   | 3  | 17 |
| 185.0395 | -0.939798457    | 13.5 | 2676.91   | 5  | 15 |
| 101.0397 | 0.258314373     | 6.5  | 2386.55   | 5  | 8  |
| 221.0399 | 1.022893293     | 16.5 | 2043.35   | 5  | 18 |
| 193.0085 | 0.653339528     | 16.5 | 1939.62   | 1  | 16 |
| 110.1101 | 0.009990001     | 2    | 1846.99   | 14 | 8  |
| 265.009  | 2.362566853     | 22.5 | 1787.15   | 1  | 22 |
| 219.024  | -0.10912045     | 17.5 | 1741.7    | 3  | 18 |
| 189.0708 | -0.919760429    | 11.5 | 1720.39   | 9  | 15 |
| 141.0709 | -0.52384979     | 7.5  | 1658.86   | 9  | 11 |

### iv. Species in LIPIDMAPS

| Mass     | Intensity | H  | C  | O | Lipid assignments |
|----------|-----------|----|----|---|-------------------|
| 169.1233 | 2491.73   | 17 | 10 | 2 | 'FA 10:1'         |
| 171.1391 | 2313.68   | 19 | 10 | 2 | 'FA 10:0'         |
| 183.1388 | 1659.13   | 19 | 11 | 2 | 'FA 11:1'         |
| 227.2016 | 3222.71   | 27 | 14 | 2 | 'FA 14:0'         |
| 241.2172 | 3010.97   | 29 | 15 | 2 | 'FA 15:0'         |
| 253.2171 | 4602.82   | 29 | 16 | 2 | 'FA 16:1'         |
| 255.2329 | 311343.4  | 31 | 16 | 2 | 'FA 16:0'         |
| 261.2221 | 5096.02   | 29 | 18 | 1 | 'ST 18:0;O'       |
| 269.2487 | 2213.19   | 33 | 17 | 2 | 'FA 17:0'         |
| 281.2484 | 21013.3   | 33 | 18 | 2 | 'FA 18:1'         |
| 283.2642 | 261965.6  | 35 | 18 | 2 | 'FA 18:0'         |

|          |          |    |    |   |                                             |
|----------|----------|----|----|---|---------------------------------------------|
| 419.1711 | 19105.95 | 27 | 22 | 8 | 'ST 22:5;O8'                                |
| 431.2072 | 1619.65  | 31 | 24 | 7 | 'ST 18:3;O;GICA/ST 18:4;O2;Hex/ST 24:5;O7'  |
| 447.2023 | 16996.62 | 31 | 24 | 8 | 'ST 18:3;O2;GICA/ST 18:4;O3;Hex/ST 24:5;O8' |

**Supplementary Table 2.** Lipid group assignments made automatically in the human serum sample, using SIMS-MFP with LIPID MAPS® database of "bulk" lipid species.

| Mass (m/z) | Intensity | Assignment                                                                     | Deviation (ppm) | DBE | Lipid groups                                                    |
|------------|-----------|--------------------------------------------------------------------------------|-----------------|-----|-----------------------------------------------------------------|
| 597.4852   | 1547942   | C <sub>37</sub> H <sub>66</sub> O <sub>4</sub> Na <sup>+</sup>                 | -0.2178         | 4.5 | DG O-34:4/MG 34:4/MG O-34:5;O                                   |
| 459.2481   | 1515874   | C <sub>21</sub> H <sub>41</sub> O <sub>7</sub> PNa <sup>+</sup>                | -0.2419         | 1.5 | LPA 18:1/LPA O-18:2;O                                           |
| 780.5511   | 1151521   | C <sub>42</sub> H <sub>80</sub> NO <sub>8</sub> PNa <sup>+</sup>               | -0.3524         | 3.5 | CerP 42:3;O4/LPC 34:3;O/PC 34:2/PC O-34:3;O/PE 37:2/PE O-37:3;O |
| 671.5737   | 872161.2  | C <sub>45</sub> H <sub>76</sub> O <sub>2</sub> Na <sup>+</sup>                 | -0.0746         | 7.5 | CE 18:2                                                         |
| 599.5009   | 869365.6  | C <sub>37</sub> H <sub>66</sub> O <sub>4</sub> Na <sup>+</sup>                 | -0.1336         | 3.5 | DG O-34:3/MG 34:3/MG O-34:4;O                                   |
| 625.5163   | 834726.9  | C <sub>39</sub> H <sub>70</sub> O <sub>4</sub> Na <sup>+</sup>                 | -0.5277         | 4.5 | DG O-36:4                                                       |
| 879.7408   | 782883.4  | C <sub>55</sub> H <sub>100</sub> O <sub>6</sub> Na <sup>+</sup>                | -0.4662         | 5.5 | CE 28:0;O4/DG 52:4;O/DG O-52:5;O2/TG 52:3/TG O-52:4;O           |
| 782.5669   | 643310.7  | C <sub>42</sub> H <sub>82</sub> NO <sub>8</sub> PNa <sup>+</sup>               | -0.1599         | 2.5 | CerP 42:2;O4/LPC 34:2;O/PC 34:1/PC O-34:2;O/PE 37:1/PE O-37:2;O |
| 881.7565   | 635687.6  | C <sub>55</sub> H <sub>102</sub> O <sub>6</sub> Na <sup>+</sup>                | -0.4084         | 4.5 | DG 52:3;O/DG O-52:4;O2/TG 52:2/TG O-52:3;O                      |
| 542.4906   | 590690.2  | C <sub>34</sub> H <sub>65</sub> NO <sub>2</sub> Na <sup>+</sup>                | -0.2748         | 2.5 | Cer 34:2;O/NAE 32:2                                             |
| 808.5826   | 582898    | C <sub>44</sub> H <sub>84</sub> NO <sub>8</sub> PNa <sup>+</sup>               | -0.0929         | 3.5 | CerP 44:3;O4/PC 36:2/PC O-36:3;O/PE 39:2/PE O-39:3;O            |
| 621.4850   | 501055.7  | C <sub>39</sub> H <sub>66</sub> O <sub>4</sub> Na <sup>+</sup>                 | -0.5312         | 6.5 | CE 12:1;O2/DG O-36:6                                            |
| 721.4777   | 469499    | C <sub>39</sub> H <sub>71</sub> N <sub>0</sub> O <sub>8</sub> PNa <sup>+</sup> | -0.2441         | 4.5 | LPG O-33:5/PA 36:3/PA O-36:4;O                                  |
| 666.4832   | 376432.7  | C <sub>36</sub> H <sub>70</sub> NO <sub>6</sub> PNa <sup>+</sup>               | -0.1427         | 2.5 | CerP 36:2;O2/LPC O-28:3/LPE O-31:3                              |
| 623.5007   | 374497.3  | C <sub>39</sub> H <sub>68</sub> O <sub>4</sub> Na <sup>+</sup>                 | -0.4492         | 5.5 | CE 12:0;O2/DG O-36:5                                            |
| 487.2793   | 362594    | C <sub>23</sub> H <sub>45</sub> O <sub>7</sub> PNa <sup>+</sup>                | -0.4332         | 1.5 | LPA 20:1/LPA O-20:2;O/PA O-20:1                                 |
| 478.3290   | 256273.9  | C <sub>29</sub> H <sub>45</sub> NO <sub>3</sub> Na <sup>+</sup>                | -0.3431         | 7.5 | NAE 27:7;O                                                      |
| 804.5517   | 215617.9  | C <sub>44</sub> H <sub>80</sub> NO <sub>8</sub> PNa <sup>+</sup>               | 0.4038          | 5.5 | CerP 44:5;O4/PC 36:4/PC O-36:5;O/PE 39:4/PE O-39:5;O            |
| 877.7251   | 191341.8  | C <sub>55</sub> H <sub>98</sub> O <sub>6</sub> Na <sup>+</sup>                 | -0.5242         | 6.5 | CE 28:1;O4/DG 52:5;O/DG O-52:6;O2/TG 52:4/TG O-52:5;O           |
| 518.3214   | 188496.7  | C <sub>24</sub> H <sub>50</sub> NO <sub>7</sub> PNa <sup>+</sup>               | -0.5983         | 0.5 | LPC 16:0/LPC O-16:1;O/LPE 19:0/LPE O-19:1;O                     |
| 723.4933   | 176029.2  | C <sub>39</sub> H <sub>73</sub> O <sub>8</sub> PNa <sup>+</sup>                | -0.3125         | 3.5 | LPG O-33:4/PA 36:2/PA O-36:3;O                                  |
| 853.7250   | 175051.1  | C <sub>53</sub> H <sub>98</sub> O <sub>6</sub> Na <sup>+</sup>                 | -0.6561         | 4.5 | DG 50:3;O/DG O-50:4;O2/TG 50:2/TG O-50:3;O                      |
| 749.5087   | 163238.5  | C <sub>41</sub> H <sub>75</sub> O <sub>8</sub> PNa <sup>+</sup>                | -0.6352         | 4.5 | PA 38:3/PA O-38:4;O                                             |
| 725.5567   | 155429    | C <sub>39</sub> H <sub>79</sub> N <sub>2</sub> O <sub>6</sub> PNa <sup>+</sup> | -0.1297         | 1.5 | PE-Cer 37:1;O2/SM 34:1;O2                                       |
| 649.5164   | 151706.7  | C <sub>41</sub> H <sub>70</sub> O <sub>4</sub> Na <sup>+</sup>                 | -0.3543         | 6.5 | CE 14:1;O2/DG O-38:6                                            |
| 855.7407   | 121068.6  | C <sub>53</sub> H <sub>100</sub> O <sub>6</sub> Na <sup>+</sup>                | -0.5961         | 3.5 | DG 50:2;O/DG O-50:3;O2/TG 50:1/TG O-50:2;O                      |

|          |          |                                                                                |         |     |                                                       |
|----------|----------|--------------------------------------------------------------------------------|---------|-----|-------------------------------------------------------|
| 806.5670 | 112865.7 | C <sub>44</sub> H <sub>82</sub> NO <sub>8</sub> PNa <sup>+</sup>               | -0.0311 | 4.5 | CerP 44:4;O4/PC 36:3/PC O-36:4;O/PE 39:3/PE O-39:4;O  |
| 722.4811 | 80283.96 | C <sub>38</sub> H <sub>69</sub> NO <sub>10</sub> Na <sup>+</sup>               | -0.3725 | 4.5 | HexCer 32:3;O4                                        |
| 652.6001 | 68362.82 | C <sub>42</sub> H <sub>79</sub> NO <sub>2</sub> Na <sup>+</sup>                | -0.3051 | 3.5 | Cer 42:3;O                                            |
| 303.2294 | 66453.01 | C <sub>18</sub> H <sub>32</sub> O <sub>2</sub> Na <sup>+</sup>                 | -0.1652 | 2.5 | FA 18:2                                               |
| 905.7565 | 58932.6  | C <sub>57</sub> H <sub>102</sub> O <sub>6</sub> Na <sup>+</sup>                | -0.3976 | 6.5 | CE 30:1;O4/DG 54:5;O/DG O-54:6;O2/TG 54:4/TG O-54:5;O |
| 907.7722 | 55999.47 | C <sub>57</sub> H <sub>104</sub> O <sub>6</sub> Na <sup>+</sup>                | -0.3416 | 5.5 | CE 30:0;O4/DG 54:4;O/DG O-54:5;O2/TG 54:3/TG O-54:4;O |
| 673.5889 | 53426.17 | C <sub>45</sub> H <sub>78</sub> O <sub>2</sub> Na <sup>+</sup>                 | -0.7424 | 6.5 | CE 18:1                                               |
| 510.2683 | 52896.44 | C <sub>24</sub> H <sub>41</sub> NO <sub>9</sub> Na <sup>+</sup>                | 1.8537  | 4.5 | ST 22:0;O8;G                                          |
| 832.5827 | 51443.43 | C <sub>46</sub> H <sub>84</sub> NO <sub>8</sub> PNa <sup>+</sup>               | 0.0299  | 5.5 | CerP 46:5;O4/PC 38:4/PC O-38:5;O/PE 41:4/PE O-41:5;O  |
| 468.2577 | 45102.01 | C <sub>22</sub> H <sub>39</sub> NO <sub>8</sub> Na <sup>+</sup>                | 1.9453  | 3.5 | CAR 15:2;O4                                           |
| 745.4776 | 42706.51 | C <sub>41</sub> H <sub>71</sub> O <sub>8</sub> PNa <sup>+</sup>                | -0.3704 | 6.5 | PA 38:5/PA O-38:6;O                                   |
| 506.3602 | 40323.07 | C <sub>31</sub> H <sub>49</sub> NO <sub>3</sub> Na <sup>+</sup>                | -0.5216 | 7.5 | NAE 29:7;O                                            |
| 523.2636 | 36065.95 | C <sub>22</sub> H <sub>45</sub> O <sub>10</sub> PNa <sup>+</sup>               | -1.2539 | 0.5 | LPG 16:0;O                                            |
| 509.2478 | 35391.98 | C <sub>21</sub> H <sub>43</sub> O <sub>10</sub> PNa <sup>+</sup>               | -1.5829 | 0.5 | LPG 15:0;O                                            |
| 485.2636 | 35124.92 | C <sub>23</sub> H <sub>43</sub> O <sub>7</sub> PNa <sup>+</sup>                | -0.5381 | 2.5 | LPA 20:2/LPA O-20:3;O/PA O-20:2                       |
| 466.2055 | 34824.63 | C <sub>21</sub> H <sub>33</sub> NO <sub>9</sub> Na <sup>+</sup>                | 1.5999  | 5.5 | ST 19:1;O8;G                                          |
| 508.2523 | 32734.41 | C <sub>24</sub> H <sub>39</sub> NO <sub>9</sub> Na <sup>+</sup>                | 1.1725  | 5.5 | ST 22:1;O8;G                                          |
| 776.5928 | 32402.18 | C <sub>44</sub> H <sub>84</sub> NO <sub>6</sub> PNa <sup>+</sup>               | -0.0581 | 3.5 | CerP 44:3;O2                                          |
| 495.2323 | 28166.2  | C <sub>20</sub> H <sub>41</sub> O <sub>10</sub> PNa <sup>+</sup>               | -1.3248 | 0.5 | LPG 14:0;O                                            |
| 443.2531 | 28076.86 | C <sub>21</sub> H <sub>41</sub> O <sub>6</sub> PNa <sup>+</sup>                | -0.4424 | 1.5 | LPA O-18:2                                            |
| 810.5984 | 27569.85 | C <sub>44</sub> H <sub>86</sub> NO <sub>8</sub> PNa <sup>+</sup>               | 0.0924  | 2.5 | CerP 44:2;O4/PC 36:1/PC O-36:2;O/PE 39:1/PE O-39:2;O  |
| 522.2677 | 27082.08 | C <sub>25</sub> H <sub>41</sub> NO <sub>9</sub> Na <sup>+</sup>                | 0.6623  | 5.5 | ST 23:1;O8;G                                          |
| 470.2733 | 26738.39 | C <sub>22</sub> H <sub>41</sub> NO <sub>8</sub> Na <sup>+</sup>                | 1.8306  | 2.5 | CAR 15:1;O4                                           |
| 521.2479 | 25951.87 | C <sub>22</sub> H <sub>43</sub> O <sub>10</sub> PNa <sup>+</sup>               | -1.3546 | 1.5 | BMP 16:0/LPG 16:1;O                                   |
| 627.5322 | 25947.93 | C <sub>39</sub> H <sub>72</sub> O <sub>4</sub> Na <sup>+</sup>                 | -0.1276 | 3.5 | DG O-36:3                                             |
| 747.4935 | 25694.17 | C <sub>41</sub> H <sub>73</sub> O <sub>8</sub> PNa <sup>+</sup>                | -0.0349 | 5.5 | PA 38:4/PA O-38:5;O                                   |
| 750.5122 | 25413.56 | C <sub>40</sub> H <sub>73</sub> NO <sub>10</sub> Na <sup>+</sup>               | -0.6250 | 4.5 | HexCer 34:3;O4                                        |
| 851.7092 | 24492.81 | C <sub>53</sub> H <sub>96</sub> O <sub>6</sub> Na <sup>+</sup>                 | -0.8337 | 5.5 | CE 26:0;O4/DG 50:4;O/DG O-50:5;O2/TG 50:3/TG O-50:4;O |
| 626.5843 | 23724.68 | C <sub>40</sub> H <sub>77</sub> NO <sub>2</sub> Na <sup>+</sup>                | -0.5572 | 2.5 | Cer 40:2;O                                            |
| 536.2829 | 23127.3  | C <sub>26</sub> H <sub>43</sub> NO <sub>9</sub> Na <sup>+</sup>                | -0.1941 | 5.5 | ST 18:0;O4;HexNAC/ST 24:1;O8;G                        |
| 724.4968 | 21669.66 | C <sub>38</sub> H <sub>71</sub> NO <sub>10</sub> Na <sup>+</sup>               | -0.3024 | 3.5 | HexCer 32:2;O4                                        |
| 507.2321 | 21401.27 | C <sub>21</sub> H <sub>41</sub> O <sub>10</sub> PNa <sup>+</sup>               | -1.6878 | 1.5 | BMP 15:0/LPG 15:1;O                                   |
| 524.2839 | 21249.69 | C <sub>25</sub> H <sub>43</sub> NO <sub>9</sub> Na <sup>+</sup>                | 1.7088  | 4.5 | ST 23:0;O8;G                                          |
| 480.2575 | 21193.84 | C <sub>23</sub> H <sub>39</sub> NO <sub>8</sub> Na <sup>+</sup>                | 1.4803  | 4.5 | CAR 16:3;O4/ST 21:0;O7;G                              |
| 537.2793 | 21045.04 | C <sub>23</sub> H <sub>47</sub> O <sub>10</sub> PNa <sup>+</sup>               | -1.1281 | 0.5 | LPG 17:0;O                                            |
| 835.6663 | 20630.22 | C <sub>47</sub> H <sub>93</sub> N <sub>2</sub> O <sub>6</sub> PNa <sup>+</sup> | -0.0528 | 2.5 | PE-Cer 45:2;O2/SM 42:2;O2                             |
| 546.3528 | 19623.92 | C <sub>26</sub> H <sub>54</sub> NO <sub>7</sub> PNa <sup>+</sup>               | -0.3846 | 0.5 | LPC 18:0/LPC O-18:1;O/LPE 21:0/LPE O-21:1;O/PE O-21:0 |
| 494.2732 | 18997.13 | C <sub>24</sub> H <sub>41</sub> NO <sub>8</sub> Na <sup>+</sup>                | 1.5394  | 4.5 | CAR 17:3;O4/ST 22:0;O7;G                              |
| 551.2946 | 18521.88 | C <sub>24</sub> H <sub>49</sub> O <sub>10</sub> PNa <sup>+</sup>               | -1.7343 | 0.5 | LPG 18:0;O                                            |

|          |          |                                                                   |         |      |                                                       |
|----------|----------|-------------------------------------------------------------------|---------|------|-------------------------------------------------------|
| 483.2480 | 18465.82 | C <sub>23</sub> H <sub>41</sub> O <sub>7</sub> PNa <sup>+</sup>   | -0.4368 | 3.5  | LPA 20:3/LPA O-20:4;O/PA O-20:3                       |
| 481.2166 | 18290.46 | C <sub>19</sub> H <sub>39</sub> O <sub>10</sub> PNa <sup>+</sup>  | -1.4673 | 0.5  | LPG 13:0;O                                            |
| 447.2406 | 18160.77 | C <sub>23</sub> H <sub>38</sub> NO <sub>4</sub> SNa <sup>+</sup>  | -1.7331 | 5    | ST 23:1;O;S                                           |
| 419.2093 | 17245.78 | C <sub>21</sub> H <sub>34</sub> NO <sub>4</sub> SNa <sup>+</sup>  | -1.8490 | 5    | ST 21:1;O;S                                           |
| 903.7407 | 17062.67 | C <sub>57</sub> H <sub>100</sub> O <sub>6</sub> Na <sup>+</sup>   | -0.5644 | 7.5  | CE 30:2;O4/DG 54:6;O/DG O-54:7;O2/TG 54:5/TG O-54:6;O |
| 595.4695 | 16856.68 | C <sub>37</sub> H <sub>64</sub> O <sub>4</sub> Na <sup>+</sup>    | -0.3025 | 5.5  | CE 10:0;O2/DG O-34:5/MG 34:5/MG O-34:6;O              |
| 493.2167 | 16832    | C <sub>20</sub> H <sub>39</sub> O <sub>10</sub> PNa <sup>+</sup>  | -1.2289 | 1.5  | BMP 14:0/LPG 14:1;O                                   |
| 695.5732 | 16706.24 | C <sub>47</sub> H <sub>76</sub> O <sub>2</sub> Na <sup>+</sup>    | -0.7909 | 9.5  | CE 20:4                                               |
| 773.5087 | 16264.88 | C <sub>43</sub> H <sub>75</sub> O <sub>8</sub> PNa <sup>+</sup>   | -0.6155 | 6.5  | PA 40:5/PA O-40:6;O                                   |
| 482.2733 | 16199.64 | C <sub>23</sub> H <sub>41</sub> NO <sub>8</sub> Na <sup>+</sup>   | 1.7851  | 3.5  | CAR 16:2;O4                                           |
| 578.2908 | 15851.31 | C <sub>32</sub> H <sub>45</sub> NO <sub>5</sub> SNa <sup>+</sup>  | -0.4584 | 10.5 | ST 30:7;O3;T                                          |
| 478.2054 | 15515.45 | C <sub>22</sub> H <sub>33</sub> NO <sub>9</sub> Na <sup>+</sup>   | 1.3507  | 6.5  | ST 20:2;O8;G                                          |
| 550.2606 | 15338.36 | C <sub>30</sub> H <sub>41</sub> NO <sub>5</sub> SNa <sup>+</sup>  | 1.5173  | 10.5 | ST 28:7;O3;T                                          |
| 647.5009 | 15282.13 | C <sub>41</sub> H <sub>68</sub> O <sub>4</sub> Na <sup>+</sup>    | -0.1237 | 7.5  | CE 14:2;O2/DG O-38:7                                  |
| 464.1900 | 15094.65 | C <sub>21</sub> H <sub>31</sub> NO <sub>9</sub> Na <sup>+</sup>   | 1.9300  | 6.5  | ST 19:2;O8;G                                          |
| 535.2634 | 14897.59 | C <sub>23</sub> H <sub>45</sub> O <sub>10</sub> PNa <sup>+</sup>  | -1.5994 | 1.5  | BMP 17:0/LPG 17:1;O                                   |
| 441.2373 | 14757.14 | C <sub>21</sub> H <sub>39</sub> O <sub>6</sub> PNa <sup>+</sup>   | -0.7844 | 2.5  | LPA O-18:3                                            |
| 540.4750 | 14520.16 | C <sub>34</sub> H <sub>63</sub> NO <sub>2</sub> Na <sup>+</sup>   | -0.1834 | 3.5  | Cer 34:3;O/NAE 32:3                                   |
| 505.2532 | 14424.05 | C <sub>22</sub> H <sub>43</sub> O <sub>9</sub> PNa <sup>+</sup>   | -0.9720 | 1.5  | LPG 16:1/LPG O-16:2;O                                 |
| 479.2373 | 14186.65 | C <sub>20</sub> H <sub>41</sub> O <sub>9</sub> PNa <sup>+</sup>   | -1.5464 | 0.5  | LPG 14:0/LPG O-14:1;O                                 |
| 565.3102 | 14103.68 | C <sub>25</sub> H <sub>51</sub> O <sub>10</sub> PNa <sup>+</sup>  | -1.7797 | 0.5  | LPG 19:0;O                                            |
| 750.5768 | 14044.44 | C <sub>42</sub> H <sub>62</sub> NO <sub>6</sub> PNa <sup>+</sup>  | -0.5264 | 2.5  | CerP 42:2;O2/LPC O-34:3                               |
| 437.1905 | 13352.08 | C <sub>17</sub> H <sub>35</sub> O <sub>9</sub> PNa <sup>+</sup>   | -1.3520 | 0.5  | LPG 11:0/LPG O-11:1;O                                 |
| 463.2061 | 13298.84 | C <sub>19</sub> H <sub>37</sub> O <sub>9</sub> PNa <sup>+</sup>   | -1.3841 | 1.5  | LPG 13:1/LPG O-13:2;O                                 |
| 493.2530 | 13021.22 | C <sub>21</sub> H <sub>43</sub> O <sub>9</sub> PNa <sup>+</sup>   | -1.4011 | 0.5  | LPG 15:0/LPG O-15:1;O                                 |
| 477.2218 | 12746.17 | C <sub>20</sub> H <sub>39</sub> O <sub>9</sub> PNa <sup>+</sup>   | -1.2386 | 1.5  | LPG 14:1/LPG O-14:2;O                                 |
| 564.2756 | 12467.62 | C <sub>31</sub> H <sub>43</sub> NO <sub>5</sub> SNa <sup>+</sup>  | 0.3277  | 10.5 | ST 29:7;O3;T                                          |
| 570.5216 | 12278.62 | C <sub>36</sub> H <sub>69</sub> NO <sub>2</sub> Na <sup>+</sup>   | -0.7872 | 2.5  | Cer 36:2;O/NAE 34:2                                   |
| 519.2321 | 12137.09 | C <sub>22</sub> H <sub>41</sub> O <sub>10</sub> PNa <sup>+</sup>  | -1.6488 | 2.5  | BMP 16:1/LPG 16:2;O                                   |
| 433.2250 | 11942.48 | C <sub>22</sub> H <sub>36</sub> NO <sub>4</sub> SNa <sup>+</sup>  | -1.6737 | 5    | ST 22:1;O;S                                           |
| 538.2997 | 11208.52 | C <sub>26</sub> H <sub>45</sub> NO <sub>9</sub> Na <sup>+</sup>   | 1.9430  | 4.5  | ST 24:0;O8;G                                          |
| 451.2060 | 11129.2  | C <sub>18</sub> H <sub>37</sub> O <sub>9</sub> PNa <sup>+</sup>   | -1.6425 | 0.5  | LPG 12:0/LPG O-12:1;O                                 |
| 536.2589 | 10937.92 | C <sub>22</sub> H <sub>44</sub> NO <sub>10</sub> PNa <sup>+</sup> | -1.1284 | 1.5  | LPS 16:0;O                                            |
| 550.2746 | 10900.72 | C <sub>23</sub> H <sub>46</sub> NO <sub>10</sub> PNa <sup>+</sup> | -1.0088 | 1.5  | LPS 17:0;O                                            |
| 651.5323 | 10810.01 | C <sub>41</sub> H <sub>72</sub> O <sub>4</sub> Na <sup>+</sup>    | 0.0305  | 5.5  | CE 14:0;O2/DG O-38:5                                  |
| 552.2788 | 10792.4  | C <sub>26</sub> H <sub>43</sub> NO <sub>10</sub> Na <sup>+</sup>  | 1.5950  | 5.5  | ST 18:0;O5;HexNAC                                     |
| 573.4857 | 10731.81 | C <sub>35</sub> H <sub>66</sub> O <sub>4</sub> Na <sup>+</sup>    | 0.6450  | 2.5  | DG O-32:2/MG 32:2/MG O-32:3;O                         |
| 465.2217 | 10424.28 | C <sub>19</sub> H <sub>39</sub> O <sub>9</sub> PNa <sup>+</sup>   | -1.4855 | 0.5  | LPG 13:0/LPG O-13:1;O                                 |
| 654.6158 | 10274.94 | C <sub>42</sub> H <sub>81</sub> NO <sub>2</sub> Na <sup>+</sup>   | -0.2278 | 2.5  | Cer 42:2;O                                            |



|          |          |                                                                   |         |     |                                            |
|----------|----------|-------------------------------------------------------------------|---------|-----|--------------------------------------------|
| 494.2485 | 10097.97 | C <sub>20</sub> H <sub>42</sub> NO <sub>9</sub> PNa <sup>+</sup>  | -0.8904 | 0.5 | LPS O-14:0;O                               |
| 445.2251 | 9910.76  | C <sub>23</sub> H <sub>36</sub> NO <sub>4</sub> SNa <sup>+</sup>  | -1.4040 | 6   | ST 23:2;O;S                                |
| 484.2890 | 9651.26  | C <sub>23</sub> H <sub>43</sub> NO <sub>8</sub> Na <sup>+</sup>   | 1.8809  | 2.5 | CAR 16:1;O4                                |
| 507.2684 | 9429.59  | C <sub>22</sub> H <sub>45</sub> O <sub>9</sub> PNa <sup>+</sup>   | -1.8552 | 0.5 | LPG 16:0/LPG O-16:1;O                      |
| 650.5845 | 9362.01  | C <sub>42</sub> H <sub>77</sub> NO <sub>2</sub> Na <sup>+</sup>   | -0.2292 | 4.5 | Cer 42:4;O                                 |
| 566.2933 | 9230.5   | C <sub>27</sub> H <sub>45</sub> NO <sub>10</sub> Na <sup>+</sup>  | -0.4752 | 5.5 | ST 19:0;O5;HexNAC                          |
| 778.6083 | 9221.58  | C <sub>44</sub> H <sub>86</sub> NO <sub>6</sub> PNa <sup>+</sup>  | -0.2506 | 2.5 | CerP 44:2;O2                               |
| 552.3141 | 8985.71  | C <sub>27</sub> H <sub>47</sub> NO <sub>9</sub> Na <sup>+</sup>   | -0.3695 | 4.5 | ST 25:0;O8;G                               |
| 443.2092 | 8952.98  | C <sub>23</sub> H <sub>34</sub> NO <sub>4</sub> SNa <sup>+</sup>  | -1.9745 | 7   | ST 23:3;O;S                                |
| 578.3057 | 8931.26  | C <sub>25</sub> H <sub>50</sub> NO <sub>10</sub> PNa <sup>+</sup> | -1.3057 | 1.5 | LPS 19:0;O                                 |
| 548.2590 | 8909.32  | C <sub>23</sub> H <sub>44</sub> NO <sub>10</sub> PNa <sup>+</sup> | -0.9213 | 2.5 | LPS 17:1;O                                 |
| 564.2901 | 8663.6   | C <sub>24</sub> H <sub>48</sub> NO <sub>10</sub> PNa <sup>+</sup> | -1.2495 | 1.5 | LPS 18:0;O                                 |
| 687.5682 | 8627.48  | C <sub>45</sub> H <sub>76</sub> O <sub>3</sub> Na <sup>+</sup>    | -0.6764 | 7.5 | CE 18:2;O                                  |
| 453.1851 | 8404.84  | C <sub>17</sub> H <sub>35</sub> O <sub>10</sub> PNa <sup>+</sup>  | -1.9994 | 0.5 | LPG 11:0;O                                 |
| 503.2373 | 8399.46  | C <sub>22</sub> H <sub>41</sub> O <sub>9</sub> PNa <sup>+</sup>   | -1.4727 | 2.5 | LPG 16:2/LPG O-16:3;O                      |
| 576.2897 | 8376.85  | C <sub>25</sub> H <sub>48</sub> NO <sub>10</sub> PNa <sup>+</sup> | -1.9176 | 2.5 | LPS 19:1;O                                 |
| 496.2889 | 8320.76  | C <sub>24</sub> H <sub>43</sub> NO <sub>8</sub> Na <sup>+</sup>   | 1.6339  | 3.5 | CAR 17:2;O4                                |
| 421.2249 | 8223.45  | C <sub>21</sub> H <sub>36</sub> NO <sub>4</sub> SNa <sup>+</sup>  | -1.9588 | 4   | ST 21:0;O;S                                |
| 436.2314 | 8090.24  | C <sub>21</sub> H <sub>35</sub> NO <sub>7</sub> Na <sup>+</sup>   | 1.8933  | 4.5 | CAR 14:3;O3/ST 19:0;O6;G                   |
| 479.2007 | 7693.71  | C <sub>19</sub> H <sub>37</sub> O <sub>10</sub> PNa <sup>+</sup>  | -1.9952 | 1.5 | BMP 13:0/LPG 13:1;O                        |
| 467.2011 | 7659.52  | C <sub>18</sub> H <sub>37</sub> O <sub>10</sub> PNa <sup>+</sup>  | -1.1903 | 0.5 | LPG 12:0;O                                 |
| 606.3383 | 7640.3   | C <sub>27</sub> H <sub>54</sub> NO <sub>10</sub> PNa <sup>+</sup> | 0.8987  | 1.5 | LPS 21:0;O/PS O-21:0;O                     |
| 491.2010 | 7612.48  | C <sub>20</sub> H <sub>37</sub> O <sub>10</sub> PNa <sup>+</sup>  | -1.3357 | 2.5 | BMP 14:1/LPG 14:2;O                        |
| 497.2209 | 7556.49  | C <sub>26</sub> H <sub>36</sub> NO <sub>5</sub> SNa <sup>+</sup>  | 0.5227  | 9   | ST 26:5;O2;S                               |
| 431.2094 | 7454.9   | C <sub>22</sub> H <sub>34</sub> NO <sub>4</sub> SNa <sup>+</sup>  | -1.5656 | 6   | ST 22:2;O;S                                |
| 510.3043 | 7389.54  | C <sub>25</sub> H <sub>45</sub> NO <sub>8</sub> Na <sup>+</sup>   | 1.0991  | 3.5 | CAR 18:2;O4                                |
| 424.2312 | 7377.99  | C <sub>20</sub> H <sub>35</sub> NO <sub>7</sub> Na <sup>+</sup>   | 1.4754  | 3.5 | CAR 13:2;O3                                |
| 604.3213 | 7299.58  | C <sub>27</sub> H <sub>52</sub> NO <sub>10</sub> PNa <sup>+</sup> | -1.3322 | 2.5 | LPS 21:1;O/PS 21:0/PS O-21:1;O             |
| 562.2743 | 7245.42  | C <sub>24</sub> H <sub>46</sub> NO <sub>10</sub> PNa <sup>+</sup> | -1.5208 | 2.5 | LPS 18:1;O                                 |
| 457.2325 | 7147.71  | C <sub>21</sub> H <sub>39</sub> O <sub>7</sub> PNa <sup>+</sup>   | -0.1336 | 2.5 | LPA 18:2/LPA O-18:3;O                      |
| 827.7097 | 7011.44  | C <sub>51</sub> H <sub>96</sub> O <sub>6</sub> Na <sup>+</sup>    | -0.2538 | 3.5 | DG 48:2;O/DG O-48:3;O2/TG 48:1/TG O-48:2;O |
| 407.2093 | 6951.17  | C <sub>20</sub> H <sub>34</sub> NO <sub>4</sub> SNa <sup>+</sup>  | -1.9034 | 4   | ST 20:0;O;S                                |
| 481.2260 | 6912.66  | C <sub>26</sub> H <sub>36</sub> NO <sub>4</sub> SNa <sup>+</sup>  | 0.5713  | 9   | ST 26:5;O;S                                |
| 475.2723 | 6866.01  | C <sub>25</sub> H <sub>42</sub> NO <sub>4</sub> SNa <sup>+</sup>  | -0.7892 | 5   | ST 25:1;O;S                                |
| 613.4796 | 6861.35  | C <sub>37</sub> H <sub>66</sub> O <sub>5</sub> Na <sup>+</sup>    | -1.0515 | 4.5 | DG 34:3/DG O-34:4;O/MG 34:4;O/TG O-34:3    |
| 522.2437 | 6633.85  | C <sub>21</sub> H <sub>42</sub> NO <sub>10</sub> PNa <sup>+</sup> | -0.2970 | 1.5 | LPS 15:0;O                                 |
| 457.2254 | 6541.46  | C <sub>24</sub> H <sub>36</sub> NO <sub>4</sub> SNa <sup>+</sup>  | -0.7110 | 7   | ST 24:3;O;S                                |
| 534.2435 | 6525.23  | C <sub>22</sub> H <sub>42</sub> NO <sub>10</sub> PNa <sup>+</sup> | -0.6647 | 2.5 | LPS 16:1;O                                 |
| 459.2406 | 6494.27  | C <sub>24</sub> H <sub>38</sub> NO <sub>4</sub> SNa <sup>+</sup>  | -1.6878 | 6   | ST 24:2;O;S                                |

|          |         |                                                                                |         |      |                                                                 |
|----------|---------|--------------------------------------------------------------------------------|---------|------|-----------------------------------------------------------------|
| 746.4815 | 6381.01 | C <sub>40</sub> H <sub>69</sub> NO <sub>10</sub> Na <sup>+</sup>               | 0.1754  | 6.5  | HexCer 34:5;O4                                                  |
| 467.2533 | 5984.55 | C <sub>23</sub> H <sub>41</sub> O <sub>6</sub> PNa <sup>+</sup>                | 0.0083  | 3.5  | LPA O-20:4                                                      |
| 558.2305 | 5962.57 | C <sub>27</sub> H <sub>37</sub> NO <sub>10</sub> Na <sup>+</sup>               | -0.8403 | 9.5  | ST 19:4;O5;HexNAC                                               |
| 809.6504 | 5820.53 | C <sub>45</sub> H <sub>91</sub> N <sub>2</sub> O <sub>6</sub> PNa <sup>+</sup> | -0.3632 | 1.5  | PE-Cer 43:1;O2/SM 40:1;O2                                       |
| 536.2438 | 5745.07 | C <sub>29</sub> H <sub>39</sub> NO <sub>5</sub> SNa <sup>+</sup>               | -0.5876 | 10.5 | ST 27:7;O3;T                                                    |
| 419.2557 | 5700.08 | C <sub>26</sub> H <sub>36</sub> O <sub>3</sub> Na <sup>+</sup>                 | 0.0832  | 8.5  | ST 26:5;O3                                                      |
| 624.5689 | 5697.42 | C <sub>40</sub> H <sub>75</sub> NO <sub>2</sub> Na <sup>+</sup>                | -0.1587 | 3.5  | Cer 40:3;O                                                      |
| 571.4696 | 5446.84 | C <sub>35</sub> H <sub>64</sub> O <sub>4</sub> Na <sup>+</sup>                 | -0.1402 | 3.5  | DG O-32:3/MG 32:3/MG O-32:4;O                                   |
| 508.2273 | 5391.86 | C <sub>20</sub> H <sub>40</sub> NO <sub>10</sub> PNa <sup>+</sup>              | -1.7809 | 1.5  | LPS 14:0;O                                                      |
| 778.5355 | 5359.71 | C <sub>42</sub> H <sub>78</sub> N <sub>1</sub> O <sub>8</sub> PNa <sup>+</sup> | -0.2891 | 4.5  | CerP 42:4;O4/LPC 34:4;O/PC 34:3/PC O-34:4;O/PE 37:3/PE O-37:4;O |
| 774.5770 | 5304.35 | C <sub>44</sub> H <sub>82</sub> NO <sub>6</sub> PNa <sup>+</sup>               | -0.2519 | 4.5  | CerP 44:4;O2                                                    |
| 473.2561 | 5298.84 | C <sub>25</sub> H <sub>40</sub> NO <sub>4</sub> SNa <sup>+</sup>               | -1.9548 | 6    | ST 25:2;O;S                                                     |
| 748.4970 | 5280.62 | C <sub>40</sub> H <sub>71</sub> NO <sub>10</sub> Na <sup>+</sup>               | -0.0255 | 5.5  | HexCer 34:4;O4                                                  |
| 645.4851 | 5221.8  | C <sub>41</sub> H <sub>66</sub> O <sub>4</sub> Na <sup>+</sup>                 | -0.3565 | 8.5  | CE 14:3;O2/DG O-38:8                                            |
| 461.1914 | 5100.13 | C <sub>19</sub> H <sub>35</sub> O <sub>9</sub> PNa <sup>+</sup>                | 0.6698  | 2.5  | LPG 13:2/LPG O-13:3;O                                           |
| 469.2250 | 5082.77 | C <sub>25</sub> H <sub>36</sub> NO <sub>4</sub> SNa <sup>+</sup>               | -1.5453 | 8    | ST 25:4;O;S                                                     |
| 834.5985 | 4980.57 | C <sub>46</sub> H <sub>86</sub> NO <sub>8</sub> PNa <sup>+</sup>               | 0.2096  | 4.5  | CerP 46:4;O4/PC 38:3/PC O-38:4;O/PE 41:3/PE O-41:4;O            |
| 520.2643 | 4857.49 | C <sub>22</sub> H <sub>44</sub> NO <sub>9</sub> PNa <sup>+</sup>               | -0.5576 | 1.5  | LPS 16:0/LPS O-16:1;O                                           |
| 471.2843 | 4853.06 | C <sub>23</sub> H <sub>45</sub> O <sub>6</sub> PNa <sup>+</sup>                | -0.6283 | 1.5  | LPA O-20:2                                                      |
| 580.3062 | 4822.21 | C <sub>32</sub> H <sub>47</sub> NO <sub>5</sub> SNa <sup>+</sup>               | -0.8876 | 9.5  | ST 30:6;O3;T                                                    |
| 545.2879 | 4712.61 | C <sub>32</sub> H <sub>42</sub> O <sub>6</sub> Na <sup>+</sup>                 | 0.9901  | 11.5 | ST 26:7;O;Hex                                                   |
| 449.1902 | 4696.49 | C <sub>18</sub> H <sub>35</sub> O <sub>9</sub> PNa <sup>+</sup>                | -1.9838 | 1.5  | LPG 12:1/LPG O-12:2;O                                           |
| 450.1739 | 4633.29 | C <sub>20</sub> H <sub>29</sub> NO <sub>9</sub> Na <sup>+</sup>                | 0.9905  | 6.5  | ST 18:2;O8;G                                                    |
| 830.5665 | 4516.17 | C <sub>46</sub> H <sub>82</sub> NO <sub>8</sub> PNa <sup>+</sup>               | -0.6322 | 6.5  | CerP 46:6;O4/PC 38:5/PC O-38:6;O/PE 41:5/PE O-41:6;O            |
| 566.3309 | 4477.09 | C <sub>28</sub> H <sub>49</sub> NO <sub>9</sub> Na <sup>+</sup>                | 1.6702  | 4.5  | ST 26:0;O8;G                                                    |
| 694.5142 | 4434.42 | C <sub>38</sub> H <sub>74</sub> NO <sub>6</sub> PNa <sup>+</sup>               | -0.5689 | 2.5  | CerP 38:2;O2/LPC O-30:3/LPE O-33:3                              |
| 439.1696 | 4406.53 | C <sub>16</sub> H <sub>33</sub> O <sub>10</sub> PNa <sup>+</sup>               | -1.7217 | 0.5  | LPG 10:0;O                                                      |
| 449.2270 | 4367.58 | C <sub>19</sub> H <sub>39</sub> O <sub>8</sub> PNa <sup>+</sup>                | -1.0598 | 0.5  | LPA 16:0;O/LPG O-13:1                                           |
| 465.1851 | 4320.91 | C <sub>18</sub> H <sub>35</sub> O <sub>10</sub> PNa <sup>+</sup>               | -1.9478 | 1.5  | BMP 12:0/LPG 12:1;O                                             |
| 449.2198 | 4289.08 | C <sub>22</sub> H <sub>36</sub> NO <sub>5</sub> SNa <sup>+</sup>               | -1.8701 | 5    | ST 22:1;O2;S                                                    |
| 455.2098 | 4227    | C <sub>24</sub> H <sub>34</sub> NO <sub>4</sub> SNa <sup>+</sup>               | -0.6043 | 8    | ST 24:4;O;S                                                     |
| 825.6938 | 4199.59 | C <sub>51</sub> H <sub>94</sub> O <sub>6</sub> Na <sup>+</sup>                 | -0.5572 | 4.5  | DG 48:3;O/DG O-48:4;O2/TG 48:2/TG O-48:3;O                      |
| 483.2407 | 4190.32 | C <sub>26</sub> H <sub>38</sub> NO <sub>4</sub> SNa <sup>+</sup>               | -1.3970 | 8    | ST 26:4;O;S                                                     |
| 637.4802 | 3917.67 | C <sub>39</sub> H <sub>66</sub> O <sub>5</sub> Na <sup>+</sup>                 | -0.0708 | 6.5  | CE 12:1;O3/DG 36:5/DG O-36:6;O/TG O-36:5                        |
| 532.2277 | 3884.2  | C <sub>22</sub> H <sub>40</sub> NO <sub>10</sub> PNa <sup>+</sup>              | -0.9490 | 3.5  | LPS 16:2;O                                                      |
| 537.2886 | 3759.95 | C <sub>30</sub> H <sub>44</sub> NO <sub>4</sub> SNa <sup>+</sup>               | 0.5116  | 9    | ST 30:5;O;S                                                     |
| 594.2863 | 3682.12 | C <sub>32</sub> H <sub>45</sub> NO <sub>6</sub> SNa <sup>+</sup>               | 0.5383  | 10.5 | ST 30:7;O4;T                                                    |
| 435.2046 | 3615.16 | C <sub>21</sub> H <sub>34</sub> NO <sub>5</sub> SNa <sup>+</sup>               | -0.8964 | 5    | ST 21:1;O2;S                                                    |
| 837.6816 | 3613.87 | C <sub>47</sub> H <sub>95</sub> N <sub>2</sub> O <sub>6</sub> PNa <sup>+</sup> | -0.4705 | 1.5  | PE-Cer 45:1;O2/SM 42:1;O2                                       |

|          |         |                                                                                |         |      |                                                                                         |
|----------|---------|--------------------------------------------------------------------------------|---------|------|-----------------------------------------------------------------------------------------|
| 421.1886 | 3607.64 | C <sub>20</sub> H <sub>32</sub> NO <sub>5</sub> SNa <sup>+</sup>               | -1.7572 | 5    | ST 20:1;O <sub>2</sub> ;S                                                               |
| 537.2529 | 3542.27 | C <sub>29</sub> H <sub>40</sub> NO <sub>5</sub> SNa <sup>+</sup>               | 1.7867  | 10   | ST 29:6;O <sub>2</sub> ;S                                                               |
| 459.1746 | 3474.57 | C <sub>19</sub> H <sub>33</sub> O <sub>9</sub> PNa <sup>+</sup>                | -1.8318 | 3.5  | LPG 13:3                                                                                |
| 748.5610 | 3469.4  | C <sub>42</sub> H <sub>80</sub> NO <sub>6</sub> PNa <sup>+</sup>               | -0.7282 | 3.5  | CerP 42:3;O <sub>2</sub> /LPC O-34:4                                                    |
| 756.5505 | 3443.01 | C <sub>40</sub> H <sub>80</sub> NO <sub>8</sub> PNa <sup>+</sup>               | -1.1567 | 1.5  | CerP 40:1;O <sub>4</sub> /LPC 32:1;O/LPS O-34:1/PC 32:0/PC O-32:1;O/PE 35:0/PE O-35:1;O |
| 475.2058 | 3402.45 | C <sub>20</sub> H <sub>37</sub> O <sub>9</sub> PNa <sup>+</sup>                | -1.9804 | 2.5  | LPG 14:2/LPG O-14:3;O                                                                   |
| 469.2686 | 3334.18 | C <sub>23</sub> H <sub>43</sub> O <sub>6</sub> PNa <sup>+</sup>                | -0.7375 | 2.5  | LPA O-20:3                                                                              |
| 647.5732 | 3259.65 | C <sub>43</sub> H <sub>76</sub> O <sub>2</sub> Na <sup>+</sup>                 | -0.8495 | 5.5  | CE 16:0                                                                                 |
| 598.5534 | 3227.89 | C <sub>38</sub> H <sub>73</sub> NO <sub>2</sub> Na <sup>+</sup>                | 0.0850  | 2.5  | Cer 38:2;O                                                                              |
| 664.4678 | 3205.49 | C <sub>36</sub> H <sub>68</sub> NO <sub>6</sub> PNa <sup>+</sup>               | 0.2331  | 3.5  | CerP 36:3;O <sub>2</sub> /LPC O-28:4/LPE O-31:4                                         |
| 498.3047 | 3142.04 | C <sub>24</sub> H <sub>45</sub> NO <sub>8</sub> Na <sup>+</sup>                | 1.9283  | 2.5  | CAR 17:1;O <sub>4</sub>                                                                 |
| 478.2168 | 3134.81 | C <sub>19</sub> H <sub>38</sub> NO <sub>9</sub> PNa <sup>+</sup>               | -1.7567 | 1.5  | LPS 13:0/LPS O-13:1;O                                                                   |
| 822.4309 | 3120.31 | C <sub>44</sub> H <sub>66</sub> NO <sub>10</sub> PNa <sup>+</sup>              | -0.9181 | 12.5 | PS 38:10                                                                                |
| 751.5247 | 3097.06 | C <sub>41</sub> H <sub>77</sub> O <sub>8</sub> PNa <sup>+</sup>                | -0.1678 | 3.5  | PA 38:2/PA O-38:3;O                                                                     |
| 901.7249 | 3082.14 | C <sub>57</sub> H <sub>98</sub> O <sub>6</sub> Na <sup>+</sup>                 | -0.7320 | 8.5  | CE 30:3;O <sub>4</sub> /DG 54:7;O/DG O-54:8;O <sub>2</sub> /TG 54:6/TG O-54:7;O         |
| 452.2627 | 2998.96 | C <sub>22</sub> H <sub>39</sub> NO <sub>7</sub> Na <sup>+</sup>                | 1.8262  | 3.5  | CAR 15:2;O <sub>3</sub>                                                                 |
| 774.5124 | 2979.96 | C <sub>42</sub> H <sub>73</sub> NO <sub>10</sub> Na <sup>+</sup>               | -0.3474 | 6.5  | HexCer 36:5;O <sub>4</sub>                                                              |
| 909.7874 | 2963.55 | C <sub>57</sub> H <sub>106</sub> O <sub>6</sub> Na <sup>+</sup>                | -0.8355 | 4.5  | DG 54:3;O/DG O-54:4;O <sub>2</sub> /TG 54:2/TG O-54:3;O                                 |
| 457.1891 | 2915.21 | C <sub>23</sub> H <sub>32</sub> NO <sub>5</sub> SNa <sup>+</sup>               | -0.5252 | 8    | ST 23:4;O <sub>2</sub> ;S                                                               |
| 561.3197 | 2886.55 | C <sub>33</sub> H <sub>46</sub> O <sub>6</sub> Na <sup>+</sup>                 | 1.8526  | 10.5 | ST 27:6;O;Hex/TG 30:8                                                                   |
| 568.5056 | 2867.78 | C <sub>36</sub> H <sub>67</sub> NO <sub>2</sub> Na <sup>+</sup>                | -1.4056 | 3.5  | Cer 36:3;O/NAE 34:3                                                                     |
| 833.6506 | 2831.62 | C <sub>47</sub> H <sub>91</sub> N <sub>2</sub> O <sub>6</sub> PNa <sup>+</sup> | -0.1129 | 3.5  | PE-Cer 45:3;O <sub>2</sub> /SM 42:3;O <sub>2</sub>                                      |
| 584.2590 | 2806.9  | C <sub>26</sub> H <sub>44</sub> NO <sub>10</sub> PNa <sup>+</sup>              | -0.8645 | 5.5  | LPS 20:4;O/PS 20:3/PS O-20:4;O                                                          |
| 521.2213 | 2800.66 | C <sub>28</sub> H <sub>36</sub> NO <sub>5</sub> SNa <sup>+</sup>               | 1.2661  | 11   | ST 28:7;O <sub>2</sub> ;S                                                               |
| 771.4922 | 2724.64 | C <sub>43</sub> H <sub>73</sub> O <sub>8</sub> PNa <sup>+</sup>                | -1.7189 | 7.5  | PA 40:6/PA O-40:7;O                                                                     |
| 875.7092 | 2698.43 | C <sub>55</sub> H <sub>96</sub> O <sub>6</sub> Na <sup>+</sup>                 | -0.8109 | 7.5  | CE 28:2;O <sub>4</sub> /DG 52:6;O/DG O-52:7;O <sub>2</sub> /TG 52:5/TG O-52:6;O         |
| 538.3360 | 2691.44 | C <sub>27</sub> H <sub>49</sub> NO <sub>8</sub> Na <sup>+</sup>                | 1.7849  | 3.5  | CAR 20:2;O <sub>4</sub>                                                                 |
| 640.5999 | 2658.17 | C <sub>41</sub> H <sub>79</sub> NO <sub>2</sub> Na <sup>+</sup>                | -0.6230 | 2.5  | Cer 41:2;O                                                                              |
| 639.4960 | 2534.96 | C <sub>39</sub> H <sub>68</sub> O <sub>5</sub> Na <sup>+</sup>                 | 0.1640  | 5.5  | CE 12:0;O <sub>3</sub> /DG 36:4/DG O-36:5;O/TG O-36:4                                   |
| 723.5408 | 2418.22 | C <sub>39</sub> H <sub>77</sub> N <sub>2</sub> O <sub>6</sub> PNa <sup>+</sup> | -0.4756 | 2.5  | PE-Cer 37:2;O <sub>2</sub> /SM 34:2;O <sub>2</sub>                                      |
| 544.3376 | 2394.23 | C <sub>26</sub> H <sub>52</sub> NO <sub>7</sub> PNa <sup>+</sup>               | 0.4407  | 1.5  | LPC 18:1/LPC O-18:2;O/LPE 21:1/LPE O-21:2;O/PE O-21:1                                   |
| 917.5298 | 2375.9  | C <sub>52</sub> H <sub>79</sub> O <sub>10</sub> PNa <sup>+</sup>               | -0.5516 | 13.5 | PG 46:12                                                                                |
| 613.5163 | 2346.66 | C <sub>38</sub> H <sub>70</sub> O <sub>4</sub> Na <sup>+</sup>                 | -0.5381 | 3.5  | DG O-35:3                                                                               |
| 618.3411 | 2326.9  | C <sub>35</sub> H <sub>49</sub> NO <sub>7</sub> Na <sup>+</sup>                | 1.5783  | 11.5 | ST 27:6;O <sub>2</sub> ;HexNAC                                                          |
| 722.5462 | 2309.97 | C <sub>40</sub> H <sub>78</sub> NO <sub>6</sub> PNa <sup>+</sup>               | 0.4220  | 2.5  | CerP 40:2;O <sub>2</sub> /LPC O-32:3                                                    |
| 753.5873 | 2225.61 | C <sub>41</sub> H <sub>83</sub> N <sub>2</sub> O <sub>6</sub> PNa <sup>+</sup> | -1.0538 | 1.5  | PE-Cer 39:1;O <sub>2</sub> /SM 36:1;O <sub>2</sub>                                      |
| 610.2820 | 2187.68 | C <sub>32</sub> H <sub>45</sub> NO <sub>7</sub> SNa <sup>+</sup>               | 1.8105  | 10.5 | ST 30:7;O <sub>5</sub> ;T                                                               |
| 569.4536 | 2144.58 | C <sub>35</sub> H <sub>62</sub> O <sub>4</sub> Na <sup>+</sup>                 | -0.7553 | 4.5  | DG O-32:4/MG 32:4/MG O-32:5;O                                                           |
| 559.3039 | 2142.82 | C <sub>33</sub> H <sub>44</sub> O <sub>6</sub> Na <sup>+</sup>                 | 1.5911  | 11.5 | ST 27:7;O;Hex                                                                           |

|          |         |                                                                 |         |     |                               |
|----------|---------|-----------------------------------------------------------------|---------|-----|-------------------------------|
| 731.4985 | 2140.97 | C <sub>41</sub> H <sub>73</sub> O <sub>7</sub> PNa <sup>+</sup> | -0.1519 | 5.5 | PA O-38:5                     |
| 514.4590 | 2096.53 | C <sub>32</sub> H <sub>61</sub> NO <sub>2</sub> Na <sup>+</sup> | -0.8730 | 2.5 | Cer 32:2;O/NAE 30:2           |
| 619.4692 | 2086.03 | C <sub>39</sub> H <sub>64</sub> O <sub>4</sub> Na <sup>+</sup>  | -0.7750 | 7.5 | CE 12:2;O2/DG O-36:7          |
| 641.5112 | 2054.49 | C <sub>39</sub> H <sub>70</sub> O <sub>5</sub> Na <sup>+</sup>  | -0.5380 | 4.5 | DG 36:3/DG O-36:4;O/TG O-36:3 |

**Supplementary Table 3.** First (sorted by m/z) 60 of 3,328 peaks assigned in human serum as potential protein fragments. The assignments were made by matching the elemental composition of peaks assigned by SIMS-MFP with a database of up to 6-membered peptides, calculated using known formulas of each amino acid. Multiple amino acid sequences and ion types (a/b/c) are possible for each assigned peak.

| Mass (m/z) | Deviation (ppm) | DBE | Intensity | H  | C | N | O | S | Na | Sequence assignment of the peptide peak |
|------------|-----------------|-----|-----------|----|---|---|---|---|----|-----------------------------------------|
| 151.0479   | 0.67            | 3   | 64542.42  | 8  | 5 | 2 | 2 | 0 | 1  | AG/GA c                                 |
| 151.0842   | 0.11            | 2   | 33405.07  | 12 | 6 | 2 | 1 | 0 | 1  | VG/GV b                                 |
| 152.0319   | 0.57            | 3   | 13615.05  | 7  | 5 | 1 | 3 | 0 | 1  | SS a                                    |
| 163.0478   | 0.01            | 4   | 64592.73  | 8  | 6 | 2 | 2 | 0 | 1  | QG/NA/AN/GQ/AGG/GAG/GGA a               |
| 163.0842   | 0.10            | 3   | 237072.1  | 12 | 7 | 2 | 1 | 0 | 1  | KG/GK a/PA/AP b                         |
| 165.0635   | 0.31            | 3   | 290507.39 | 10 | 6 | 2 | 2 | 0 | 1  | AA c                                    |
| 165.0999   | 0.41            | 2   | 17348.47  | 14 | 7 | 2 | 1 | 0 | 1  | LG/VA/AV/GL b                           |
| 166.0587   | 0.02            | 3   | 23661.7   | 9  | 5 | 3 | 2 | 0 | 1  | NG/GN/GGG b                             |
| 168.0744   | 0.31            | 2   | 81514.22  | 11 | 5 | 3 | 2 | 0 | 1  | AG/GA a-NH3                             |
| 177.0635   | 0.29            | 4   | 285218.19 | 10 | 7 | 2 | 2 | 0 | 1  | QA/AQ/AAG/AGA/GAA a /PG/GP c            |
| 177.0999   | 0.38            | 3   | 88759.39  | 14 | 8 | 2 | 1 | 0 | 1  | KA/AK a                                 |
| 179.0428   | 0.49            | 4   | 48862.02  | 8  | 6 | 2 | 3 | 0 | 1  | NS/SN/SGG/GSG/GGS a                     |
| 179.0792   | 0.57            | 3   | 233730.86 | 12 | 7 | 2 | 2 | 0 | 1  | PS/SP b/VG/GV c                         |
| 180.0744   | 0.29            | 3   | 146285.04 | 11 | 6 | 3 | 2 | 0 | 1  | QG/NA/AN/GQ/AGG/GAG/GGA b               |
| 186.0639   | 0.63            | 6   | 101235.05 | 9  | 8 | 3 | 1 | 0 | 1  | HA/AH a                                 |
| 189.0636   | 0.80            | 5   | 28253.7   | 10 | 8 | 2 | 2 | 0 | 1  | NP/PN/PGG/GPG/GGP a                     |
| 189.0748   | 0.63            | 5   | 24567.84  | 10 | 7 | 4 | 1 | 0 | 1  | HG/GH b                                 |
| 189.0999   | 0.35            | 4   | 79096.74  | 14 | 9 | 2 | 1 | 0 | 1  | PP b                                    |
| 191.0792   | 0.53            | 4   | 993401.63 | 12 | 8 | 2 | 2 | 0 | 1  | NV/VN/VGG/GVG/AAA/GGV a / PA/AP c       |
| 193.0949   | 0.79            | 3   | 218516.9  | 14 | 8 | 2 | 2 | 0 | 1  | KS/SK a /TP/PT b/LG/VA/AV/GL c          |
| 194.0538   | 0.97            | 4   | 39557.32  | 9  | 6 | 3 | 3 | 0 | 1  | NG/GN/GGG c                             |
| 194.0902   | 1.05            | 3   | 385964.09 | 13 | 7 | 3 | 2 | 0 | 1  | QA/AQ/AAG/AGA/GAA b /PG/GP a-NH3        |
| 195.0742   | 0.96            | 3   | 12994.45  | 12 | 7 | 2 | 3 | 0 | 1  | EA/AE b/TA/AT c                         |
| 196.1058   | 0.78            | 2   | 15697.78  | 15 | 7 | 3 | 2 | 0 | 1  | VG/GV a-NH3                             |
| 203.0792   | 0.50            | 5   | 90741.12  | 12 | 9 | 2 | 2 | 0 | 1  | QP/PQ/PAG/APG/PGA/GPA/AGP/GAP a         |
| 203.0905   | 0.83            | 5   | 50988.64  | 12 | 8 | 4 | 1 | 0 | 1  | HA/AH b                                 |
| 205.1060   | 0.09            | 4   | 31038.31  | 14 | 8 | 4 | 1 | 0 | 1  | RA/AR a                                 |
| 206.0537   | 0.43            | 5   | 68818.51  | 9  | 7 | 3 | 3 | 0 | 1  | NN/NGG/GNG/GGN/GGGG a                   |
| 206.0901   | 0.50            | 4   | 256770.27 | 13 | 8 | 3 | 2 | 0 | 1  | NP/PN/PGG/GPG/GGP b                     |
| 208.0693   | 0.18            | 4   | 202729.3  | 11 | 7 | 3 | 3 | 0 | 1  | QG/NA/AN/GQ/AGG/GAG/GGA c               |

|          |       |   |           |    |    |   |   |   |   |                                                   |
|----------|-------|---|-----------|----|----|---|---|---|---|---------------------------------------------------|
| 208.1057 | 0.25  | 3 | 279312.13 | 15 | 8  | 3 | 2 | 0 | 1 | NV/VN/VGG/GVG/AAA/GGV b /KG/GK c/PA/AP a-NH3      |
| 214.0951 | 0.08  | 6 | 20899.89  | 13 | 10 | 3 | 1 | 0 | 1 | HV/VH a                                           |
| 215.0791 | 0.01  | 6 | 17214.95  | 12 | 10 | 2 | 2 | 0 | 1 | YG/GY b                                           |
| 216.0743 | -0.22 | 6 | 32822.5   | 11 | 9  | 3 | 2 | 0 | 1 | HT/TH a                                           |
| 217.0947 | -0.22 | 5 | 186713.49 | 14 | 10 | 2 | 2 | 0 | 1 | PAA/APA/AAP a /PP c                               |
| 219.0740 | -0.06 | 5 | 49085.82  | 12 | 9  | 2 | 3 | 0 | 1 | PSG/SPG/PGS/GPS/SGP/GSP a                         |
| 219.0852 | -0.21 | 5 | 14025.58  | 12 | 8  | 4 | 2 | 0 | 1 | HS/SH b                                           |
| 222.0849 | -0.05 | 4 | 597805.78 | 13 | 8  | 3 | 3 | 0 | 1 | QA/AQ/AAG/AGA/GAA c                               |
| 223.0689 | -0.13 | 4 | 10003.22  | 12 | 8  | 2 | 4 | 0 | 1 | TSG/STG/SSA/TGS/SAS/ASS/GTS/SGT/GST a /EA/AE c    |
| 223.0801 | -0.27 | 4 | 14349.11  | 12 | 7  | 4 | 3 | 0 | 1 | NN/NGG/GNG/GGN/GGGG b                             |
| 225.0957 | -0.49 | 3 | 28434.69  | 14 | 7  | 4 | 3 | 0 | 1 | QG/NA/AN/GQ/AGG/GAG/GGA a-NH3                     |
| 227.0789 | -0.87 | 7 | 11943.93  | 12 | 11 | 2 | 2 | 0 | 1 | FG/GF c                                           |
| 228.1109 | 0.74  | 6 | 25376.83  | 15 | 11 | 3 | 1 | 0 | 1 | HL/LH a                                           |
| 229.0695 | -0.42 | 7 | 15465.57  | 10 | 9  | 4 | 2 | 0 | 1 | HN/NH/HGG/GHG/GGH a                               |
| 229.0947 | -0.21 | 6 | 20193.56  | 14 | 11 | 2 | 2 | 0 | 1 | PPG/PGP/GPP a /YA/FS/SF/AY b                      |
| 229.1059 | -0.35 | 6 | 55991.22  | 14 | 10 | 4 | 1 | 0 | 1 | HP/PH b                                           |
| 231.0852 | -0.20 | 6 | 131113.65 | 12 | 9  | 4 | 2 | 0 | 1 | HA/AH c                                           |
| 233.0896 | -0.27 | 5 | 93613.12  | 14 | 10 | 2 | 3 | 0 | 1 | TPG/PTG/PSA/SPA/PAS/APS/TGP/SAP/ASP/GTP/PGT/GPT a |
| 233.1008 | -0.41 | 5 | 141331.99 | 14 | 9  | 4 | 2 | 0 | 1 | HT/TH b                                           |
| 234.0961 | -0.19 | 5 | 22013.49  | 13 | 8  | 5 | 2 | 0 | 1 | HG/GH a-NH3                                       |
| 236.0640 | -0.75 | 5 | 9704.15   | 11 | 8  | 3 | 4 | 0 | 1 | NSG/SNG/NGS/GNS/SGN/GSN/SGGG/GSGG/GGSG/GGGS a     |
| 241.0946 | -0.61 | 7 | 41374.4   | 14 | 12 | 2 | 2 | 0 | 1 | FA/AF c                                           |
| 243.0852 | -0.19 | 7 | 47233.49  | 12 | 10 | 4 | 2 | 0 | 1 | HQ/QH/HAG/AHG/HGA/GHA/AGH/GAH a                   |
| 244.1056 | -0.19 | 6 | 165225.9  | 15 | 11 | 3 | 2 | 0 | 1 | FG/GF a-NH3                                       |
| 245.0896 | -0.26 | 6 | 17957.79  | 14 | 11 | 2 | 3 | 0 | 1 | YS/SY b                                           |
| 246.0848 | -0.46 | 6 | 165867.93 | 13 | 10 | 3 | 3 | 0 | 1 | NPG/PNG/NGP/GNP/PGN/GPN/PGGG/GPGG/GGPG/GGGP a     |
| 246.0961 | -0.18 | 6 | 12297.54  | 13 | 9  | 5 | 2 | 0 | 1 | HN/NH/HGG/GHG/GGH b                               |
| 247.0800 | -0.65 | 6 | 11176.03  | 12 | 9  | 4 | 3 | 0 | 1 | HD/DH b/HS/SH c/                                  |
| 248.1117 | -0.38 | 5 | 34980.9   | 15 | 9  | 5 | 2 | 0 | 1 | RN/NR/RGG/GRG/GGR a /HA/AH a-NH3                  |
| 249.0957 | -0.45 | 5 | 118316.54 | 14 | 9  | 4 | 3 | 0 | 1 | RD/DR a                                           |

**Supplementary Table 4.** Assignments of abundant serum proteins, albumin, transferrin and fibronectin, enabled by SIMS-MFP and amino acid sequence search developed previously (code available on Github, <https://github.com/guferraz/simsdenovo/>).

| Human serum albumin |           |                                                                               |                 |     |                     |
|---------------------|-----------|-------------------------------------------------------------------------------|-----------------|-----|---------------------|
| Mass (m/z)          | Intensity | Assignment                                                                    | Deviation (ppm) | DBE | Sequence assignment |
| 194.0902            | 385964.09 | C <sub>7</sub> H <sub>13</sub> N <sub>3</sub> O <sub>2</sub> Na <sup>+</sup>  | 0.86            | 3   | QA a                |
| 265.1270            | 436399.14 | C <sub>10</sub> H <sub>18</sub> N <sub>4</sub> O <sub>3</sub> Na <sup>+</sup> | -0.27           | 4   | QAA a               |
| 378.2111            | 396449.82 | C <sub>16</sub> H <sub>29</sub> N <sub>5</sub> O <sub>4</sub> Na <sup>+</sup> | -0.29           | 5   | QAAL a              |
| 435.2324            | 191754.07 | C <sub>18</sub> H <sub>32</sub> N <sub>6</sub> O <sub>5</sub> Na <sup>+</sup> | -0.46           | 6   | QAALG a             |
| 548.3166            | 51031.77  | C <sub>24</sub> H <sub>43</sub> N <sub>7</sub> O <sub>6</sub> Na <sup>+</sup> | -0.17           | 7   | QAALGL a            |
| 222.0849            | 597805.78 | C <sub>8</sub> H <sub>13</sub> N <sub>3</sub> O <sub>3</sub> Na <sup>+</sup>  | -0.22           | 4   | QA b                |
| 293.1219            | 337975.09 | C <sub>11</sub> H <sub>18</sub> N <sub>4</sub> O <sub>4</sub> Na <sup>+</sup> | -0.33           | 5   | QAA b               |
| 406.2059            | 446712.66 | C <sub>17</sub> H <sub>29</sub> N <sub>5</sub> O <sub>5</sub> Na <sup>+</sup> | -0.38           | 6   | QAAL b              |
| 463.2274            | 139180.91 | C <sub>19</sub> H <sub>32</sub> N <sub>6</sub> O <sub>6</sub> Na <sup>+</sup> | -0.37           | 7   | QAALG b             |
| 576.3113            | 39553.65  | C <sub>25</sub> H <sub>43</sub> N <sub>7</sub> O <sub>7</sub> Na <sup>+</sup> | -0.49           | 8   | QAALGL b            |
| 239.1113            | 15420.07  | C <sub>8</sub> H <sub>16</sub> N <sub>4</sub> O <sub>3</sub> Na <sup>+</sup>  | -0.48           | 3   | QA c                |
| 310.1488            | 11375.97  | C <sub>11</sub> H <sub>21</sub> N <sub>5</sub> O <sub>4</sub> Na <sup>+</sup> | 0.77            | 4   | QAA c               |
| 423.2325            | 14456.29  | C <sub>17</sub> H <sub>32</sub> N <sub>6</sub> O <sub>5</sub> Na <sup>+</sup> | -0.29           | 5   | QAAL c              |
| 480.2546            | 4832.96   | C <sub>19</sub> H <sub>35</sub> N <sub>7</sub> O <sub>6</sub> Na <sup>+</sup> | 1.03            | 6   | QAALG c             |
| 177.0635            | 285218.19 | C <sub>7</sub> H <sub>10</sub> N <sub>2</sub> O <sub>2</sub> Na <sup>+</sup>  | 0.48            | 4   | QA a-NH3            |
| 248.1005            | 119002.01 | C <sub>10</sub> H <sub>15</sub> N <sub>3</sub> O <sub>3</sub> Na <sup>+</sup> | -0.39           | 5   | QAA a-NH3           |
| 361.1846            | 827740.55 | C <sub>16</sub> H <sub>26</sub> N <sub>4</sub> O <sub>4</sub> Na <sup>+</sup> | -0.17           | 6   | QAAL a-NH3          |
| 418.2059            | 670771.72 | C <sub>18</sub> H <sub>29</sub> N <sub>5</sub> O <sub>5</sub> Na <sup>+</sup> | -0.36           | 7   | QAALG a-NH3         |
| 531.2899            | 96204.84  | C <sub>24</sub> H <sub>40</sub> N <sub>6</sub> O <sub>6</sub> Na <sup>+</sup> | -0.40           | 8   | QAALGL a-NH3        |
| 260.1482            | 9245.52   | C <sub>11</sub> H <sub>19</sub> N <sub>5</sub> ONa <sup>+</sup>               | 0.01            | 5   | HK a                |
| 347.1801            | 101012.8  | C <sub>14</sub> H <sub>24</sub> N <sub>6</sub> O <sub>3</sub> Na <sup>+</sup> | -0.20           | 6   | HKS a               |
| 476.2227            | 25134.05  | C <sub>19</sub> H <sub>31</sub> N <sub>7</sub> O <sub>6</sub> Na <sup>+</sup> | -0.22           | 8   | HKSE a              |
| 575.2918            | 63260.83  | C <sub>24</sub> H <sub>40</sub> N <sub>8</sub> O <sub>7</sub> Na <sup>+</sup> | 0.98            | 9   | HKSEV a             |
| 646.3296            | 8422.98   | C <sub>27</sub> H <sub>45</sub> N <sub>9</sub> O <sub>8</sub> Na <sup>+</sup> | 1.93            | 10  | HKSEVA a            |
| 288.1430            | 58162.55  | C <sub>12</sub> H <sub>19</sub> N <sub>5</sub> O <sub>2</sub> Na <sup>+</sup> | -0.28           | 6   | HK b                |
| 375.1751            | 22219.56  | C <sub>15</sub> H <sub>24</sub> N <sub>6</sub> O <sub>4</sub> Na <sup>+</sup> | -0.08           | 7   | HKS b               |
| 504.2178            | 15102.82  | C <sub>20</sub> H <sub>31</sub> N <sub>7</sub> O <sub>7</sub> Na <sup>+</sup> | 0.10            | 9   | HKSE b              |
| 603.2874            | 9395.91   | C <sub>25</sub> H <sub>40</sub> N <sub>8</sub> O <sub>8</sub> Na <sup>+</sup> | 2.03            | 10  | HKSEV b             |
| 674.3257            | 5551.28   | C <sub>28</sub> H <sub>45</sub> N <sub>9</sub> O <sub>9</sub> Na <sup>+</sup> | 3.61            | 11  | HKSEVA b            |
| 243.1216            | 16945.09  | C <sub>11</sub> H <sub>16</sub> N <sub>4</sub> ONa <sup>+</sup>               | -0.23           | 6   | HK a-NH3            |
| 330.1536            | 168744.97 | C <sub>14</sub> H <sub>21</sub> N <sub>5</sub> O <sub>3</sub> Na <sup>+</sup> | -0.03           | 7   | HKS a-NH3           |
| 459.1962            | 36073.28  | C <sub>19</sub> H <sub>28</sub> N <sub>6</sub> O <sub>6</sub> Na <sup>+</sup> | -0.17           | 9   | HKSE a-NH3          |
| 558.2648            | 26358.07  | C <sub>24</sub> H <sub>37</sub> N <sub>7</sub> O <sub>7</sub> Na <sup>+</sup> | 0.21            | 10  | HKSEV a-NH3         |
| 629.3020            | 10641.29  | C <sub>27</sub> H <sub>42</sub> N <sub>8</sub> O <sub>8</sub> Na <sup>+</sup> | 0.42            | 11  | HKSEVA a-NH3        |

**Human transferrin**

| Mass (m/z) | Intensity | Assignment                                                                    | Deviation (ppm) | DBE | Sequence assignment |
|------------|-----------|-------------------------------------------------------------------------------|-----------------|-----|---------------------|
| 531.3264   | 29307.12  | C <sub>25</sub> H <sub>44</sub> N <sub>6</sub> O <sub>5</sub> Na <sup>+</sup> | -0.29           | 7   | NLKPV a-NH3         |
| 630.3946   | 3680.45   | C <sub>30</sub> H <sub>53</sub> N <sub>7</sub> O <sub>6</sub> Na <sup>+</sup> | -0.53           | 8   | NLKPVV a-NH3        |
| 701.4318   | 1684.03   | C <sub>33</sub> H <sub>58</sub> N <sub>8</sub> O <sub>7</sub> Na <sup>+</sup> | -0.38           | 9   | NLKPVVA a-NH3       |
| 349.2209   | 204189.6  | C <sub>16</sub> H <sub>30</sub> N <sub>4</sub> O <sub>3</sub> Na <sup>+</sup> | -0.21           | 4   | LEK a-NH3           |
| 420.2580   | 48135.49  | C <sub>19</sub> H <sub>35</sub> N <sub>5</sub> O <sub>4</sub> Na <sup>+</sup> | -0.27           | 5   | LEKA a-NH3          |
| 519.3258   | 40499.77  | C <sub>24</sub> H <sub>44</sub> N <sub>6</sub> O <sub>5</sub> Na <sup>+</sup> | -1.36           | 6   | LEKAV a-NH3         |
| 590.3631   | 1955.09   | C <sub>27</sub> H <sub>49</sub> N <sub>7</sub> O <sub>6</sub> Na <sup>+</sup> | -0.91           | 7   | LEKAVA a-NH3        |

**Human fibronectin**

| Mass (m/z) | Intensity | Assignment                                                                    | Deviation (ppm) | DBE | Sequence assignment |
|------------|-----------|-------------------------------------------------------------------------------|-----------------|-----|---------------------|
| 233.1008   | 141331.99 | C <sub>9</sub> H <sub>14</sub> N <sub>4</sub> O <sub>2</sub> Na <sup>+</sup>  | -0.23           | 5   | TT a                |
| 346.1848   | 84358.43  | C <sub>15</sub> H <sub>25</sub> N <sub>5</sub> O <sub>3</sub> Na <sup>+</sup> | -0.36           | 6   | TTL a               |
| 474.2434   | 13685.6   | C <sub>20</sub> H <sub>33</sub> N <sub>7</sub> O <sub>5</sub> Na <sup>+</sup> | -0.26           | 8   | TTLQ a              |
| 571.2963   | 12205.61  | C <sub>25</sub> H <sub>40</sub> N <sub>8</sub> O <sub>6</sub> Na <sup>+</sup> | -0.08           | 10  | TTLQP a             |
| 628.3178   | 7454.45   | C <sub>27</sub> H <sub>43</sub> N <sub>9</sub> O <sub>7</sub> Na <sup>+</sup> | -0.01           | 11  | TTLQPG a            |
| 216.0743   | 32822.5   | C <sub>9</sub> H <sub>11</sub> N <sub>3</sub> O <sub>2</sub> Na <sup>+</sup>  | -0.37           | 6   | TT a-NH3            |
| 329.1585   | 176485.78 | C <sub>15</sub> H <sub>22</sub> N <sub>4</sub> O <sub>3</sub> Na <sup>+</sup> | 0.12            | 7   | TTL a-NH3           |
| 457.2168   | 52780.46  | C <sub>20</sub> H <sub>30</sub> N <sub>6</sub> O <sub>5</sub> Na <sup>+</sup> | -0.44           | 9   | TTLQ a-NH3          |
| 554.2691   | 19494.24  | C <sub>25</sub> H <sub>37</sub> N <sub>7</sub> O <sub>6</sub> Na <sup>+</sup> | -1.16           | 11  | TTLQP a-NH3         |
| 611.2911   | 4651.97   | C <sub>27</sub> H <sub>40</sub> N <sub>8</sub> O <sub>7</sub> Na <sup>+</sup> | -0.13           | 12  | TTLQPG a-NH3        |

**Supplementary Table 5.** Assignments of 50 most abundant salt ions in the human serum spectrum assigned by formula search in a human serum peak list with elemental composition within limits: C<sub>0</sub>, H<sub>1-10</sub>, N<sub>0-0</sub>, O<sub>0-10</sub>, S<sub>0-1</sub>, P<sub>0-5</sub>, Na<sub>0-5</sub>, Ca<sub>0-5</sub>, Cl<sub>0-5</sub>

| Mass (m/z) | Deviation (ppm) | DBE | Intensity | Assignment                                                     |
|------------|-----------------|-----|-----------|----------------------------------------------------------------|
| 158.9131   | 0.27            | 1   | 17374.73  | PO <sub>4</sub> HNaCa <sup>+</sup>                             |
| 163.9222   | 0.13            | 1.5 | 536719.5  | PO <sub>4</sub> Na <sub>3</sub> <sup>+</sup>                   |
| 164.9301   | 0.58            | 1   | 35374622  | PO <sub>4</sub> HNa <sub>3</sub> <sup>+</sup>                  |
| 174.8780   | -0.31           | 1.5 | 15440.77  | PO <sub>4</sub> Ca <sub>2</sub> <sup>+</sup>                   |
| 175.9461   | 2.19            | 0   | 103526.4  | PO <sub>6</sub> H <sub>3</sub> Na <sub>2</sub> <sup>+</sup>    |
| 176.8938   | 0.54            | 0.5 | 2173489   | PO <sub>4</sub> H <sub>2</sub> Ca <sub>2</sub> <sup>+</sup>    |
| 176.9237   | 0.44            | 0   | 119777.9  | PO <sub>5</sub> H <sub>3</sub> NaCa <sup>+</sup>               |
| 180.8946   | -2.22           | 1.5 | 234310.8  | PO <sub>4</sub> H <sub>0</sub> Na <sub>2</sub> Ca <sup>+</sup> |
| 182.8963   | 1.01            | 1   | 21241.72  | PO <sub>3</sub> Na <sub>3</sub> Cl <sup>+</sup>                |
| 182.9108   | 0.81            | 0.5 | 980327.7  | PO <sub>4</sub> H <sub>2</sub> Na <sub>2</sub> Ca <sup>+</sup> |
| 186.9121   | 0.81            | 1.5 | 29309137  | PO <sub>4</sub> Na <sub>4</sub> <sup>+</sup>                   |

|          |       |     |                                                                                                   |
|----------|-------|-----|---------------------------------------------------------------------------------------------------|
| 186.9172 | 1.21  | 0   | 304754 PO <sub>6</sub> H <sub>2</sub> NaCl <sup>+</sup>                                           |
| 189.9254 | 2.21  | 1   | 596262.3 PO <sub>7</sub> HNa <sub>2</sub> <sup>+</sup>                                            |
| 192.8888 | 0.94  | 0.5 | 1822408 PO <sub>5</sub> H <sub>2</sub> Ca <sub>2</sub> <sup>+</sup>                               |
| 198.9057 | 0.67  | 0.5 | 11958186 PO <sub>5</sub> H <sub>2</sub> Na <sub>2</sub> Ca <sup>+</sup>                           |
| 204.9226 | 0.42  | 0.5 | 17347588 PO <sub>5</sub> H <sub>2</sub> Na <sub>4</sub> <sup>+</sup>                              |
| 212.9149 | 0.71  | 1   | 4008325 PO <sub>7</sub> HNa <sub>3</sub> <sup>+</sup>                                             |
| 214.8706 | 0.17  | 1   | 61294.92 PO <sub>5</sub> HNaCa <sub>2</sub> <sup>+</sup>                                          |
| 216.8862 | -0.06 | 0   | 40272.44 PO <sub>5</sub> H <sub>3</sub> NaCa <sub>2</sub> <sup>+</sup>                            |
| 220.8874 | -0.50 | 1   | 516552.2 PO <sub>5</sub> HNa <sub>3</sub> Ca <sup>+</sup>                                         |
| 220.909  | -0.83 | 0.5 | 252973 P <sub>2</sub> O <sub>4</sub> H <sub>3</sub> Na <sub>4</sub> <sup>+</sup>                  |
| 222.9031 | -0.27 | 0   | 230107.3 PO <sub>5</sub> H <sub>3</sub> Na <sub>3</sub> Ca <sup>+</sup>                           |
| 226.8857 | -0.31 | 2   | 109877.6 P <sub>2</sub> O <sub>6</sub> Na <sub>3</sub> <sup>+</sup>                               |
| 226.9044 | -0.25 | 1   | 380279.4 PO <sub>5</sub> HNa <sub>5</sub> <sup>+</sup>                                            |
| 228.9097 | 0.16  | 1   | 7492826 PO <sub>8</sub> HNa <sub>3</sub> <sup>+</sup>                                             |
| 230.9254 | 0.37  | 0   | 138934.4 PO <sub>8</sub> H <sub>3</sub> Na <sub>3</sub> <sup>+</sup>                              |
| 232.8811 | -0.12 | 0   | 830770.7 PO <sub>6</sub> H <sub>3</sub> NaCa <sub>2</sub> <sup>+</sup>                            |
| 234.8967 | 0.03  | 1.5 | 596586.5 PO <sub>7</sub> Na <sub>4</sub> <sup>+</sup>                                             |
| 238.8980 | -0.31 | 0   | 16007352 PO <sub>6</sub> H <sub>3</sub> Na <sub>3</sub> Ca <sup>+</sup>                           |
| 244.8705 | -0.28 | 1   | 1862251 PO <sub>4</sub> Na <sub>5</sub> Cl <sup>+</sup>                                           |
| 246.9202 | -0.12 | 0   | 13063913 PO <sub>9</sub> H <sub>3</sub> Na <sub>3</sub> <sup>+</sup>                              |
| 250.8833 | -0.26 | 1.5 | 93334.51 P <sub>2</sub> O <sub>6</sub> HNa <sub>4</sub> <sup>+</sup>                              |
| 250.8916 | -0.03 | 1.5 | 6897698 PO <sub>8</sub> Na <sub>4</sub> <sup>+</sup>                                              |
| 254.8845 | -0.97 | 0   | 112185.8 P <sub>2</sub> O <sub>5</sub> H <sub>4</sub> Na <sub>3</sub> Ca <sup>+</sup>             |
| 256.8641 | -0.34 | 0   | 6850488 PO <sub>5</sub> H <sub>2</sub> Na <sub>3</sub> CaCl <sup>+</sup>                          |
| 260.8800 | -0.07 | 0.5 | 1884970 PO <sub>6</sub> H <sub>2</sub> Na <sub>4</sub> Ca <sup>+</sup>                            |
| 263.8933 | 0.94  | 0   | 2484055 PO <sub>9</sub> H <sub>3</sub> Na <sub>2</sub> Ca <sup>+</sup>                            |
| 268.8723 | 0.17  | 1   | 1131889 PO <sub>8</sub> HNa <sub>3</sub> Ca <sup>+</sup>                                          |
| 276.8665 | -0.69 | 0.5 | 72838.71 P <sub>2</sub> O <sub>5</sub> H <sub>3</sub> Na <sub>4</sub> Ca <sup>+</sup>             |
| 286.8683 | 0.05  | 0.5 | 870317.9 PO <sub>8</sub> HNa <sub>4</sub> Cl <sup>+</sup>                                         |
| 288.8601 | -0.43 | 2   | 3335399 P <sub>2</sub> O <sub>7</sub> Na <sub>5</sub> <sup>+</sup>                                |
| 288.8653 | 0.18  | 0.5 | 112453 P <sub>2</sub> O <sub>9</sub> H <sub>2</sub> Na <sub>2</sub> Cl <sup>+</sup>               |
| 300.8538 | -0.14 | 1   | 1234999 P <sub>2</sub> O <sub>8</sub> H <sub>2</sub> Na <sub>3</sub> Ca <sup>+</sup>              |
| 318.8345 | 0.04  | 0.5 | 18006.9 P <sub>2</sub> O <sub>8</sub> H <sub>3</sub> Na <sub>2</sub> Ca <sub>2</sub> <sup>+</sup> |
| 318.8644 | -0.02 | 0   | 3033530 P <sub>2</sub> O <sub>9</sub> H <sub>4</sub> Na <sub>3</sub> Ca <sup>+</sup>              |
| 324.8812 | -0.47 | 0   | 46885.75 P <sub>2</sub> O <sub>9</sub> H <sub>4</sub> Na <sub>5</sub> <sup>+</sup>                |
| 374.8218 | 2.03  | 1   | 1826292 PO <sub>6</sub> HNa <sub>9</sub> Ca <sup>+</sup>                                          |
| 392.8324 | 2.03  | 0   | 2504059 PO <sub>7</sub> H <sub>3</sub> Na <sub>9</sub> Ca <sup>+</sup>                            |
| 396.8037 | 1.81  | 1.5 | 97944.77 PO <sub>6</sub> Ca <sup>+</sup>                                                          |



**Supplementary Table 6:** Output from SIMSMFP on carbonaceous ions ( $C_nH_{<1}^-$ ) found in negative ion depth profile datasets from different engine deposits. a. injector tip 1, b. injector tip 2, c. injector needle 1

a)

| Mass (m/z) | Deviation (ppm) | DBE  | Intensity (AU) | H | C  |
|------------|-----------------|------|----------------|---|----|
| 84.0003    | -2.963075876    | 8    | 6612870.74     | 0 | 7  |
| 96.0004    | -1.551032798    | 9    | 220073965.8    | 0 | 8  |
| 97.0083    | -0.761789906    | 8.5  | 47997971.37    | 1 | 8  |
| 108.0005   | -0.452775477    | 10   | 84130360.44    | 0 | 9  |
| 109.0084   | 0.239431147     | 9.5  | 4132749.92     | 1 | 9  |
| 120.0005   | -0.407498136    | 11   | 78048155.01    | 0 | 10 |
| 121.0083   | -0.610701537    | 10.5 | 79168732.6     | 1 | 10 |
| 132.0005   | -0.370453005    | 12   | 30397142.14    | 0 | 11 |
| 133.0086   | 1.699892972     | 11.5 | 12830317.97    | 1 | 11 |
| 144.0004   | -1.034023836    | 13   | 152560782.5    | 0 | 12 |
| 145.0084   | 0.179989605     | 12.5 | 80177698.65    | 1 | 12 |
| 156.0005   | -0.313460436    | 14   | 25463202.22    | 0 | 13 |
| 157.0085   | 0.803141876     | 13.5 | 9373906.88     | 1 | 13 |
| 168.0005   | -0.291070478    | 15   | 10157390.85    | 0 | 14 |
| 169.0085   | 0.746116876     | 14.5 | 41521754.62    | 1 | 14 |
| 180.0005   | -0.271665838    | 16   | 2368939.23     | 0 | 15 |
| 181.0087   | 1.801574109     | 15.5 | 62770085.39    | 1 | 15 |
| 192.0005   | -0.254686772    | 17   | 3750276.95     | 0 | 16 |
| 193.0084   | 0.135227293     | 16.5 | 17708528.08    | 1 | 16 |
| 204.0005   | -0.239705238    | 18   | 12599560.26    | 0 | 17 |
| 205.0087   | 1.590666731     | 17.5 | 6013949.93     | 1 | 17 |
| 216.0005   | -0.226388314    | 19   | 1353836.11     | 0 | 18 |
| 217.0085   | 0.581083567     | 18.5 | 1720664.31     | 1 | 18 |
| 228.0006   | 0.224122267     | 20   | 2420252.62     | 0 | 19 |
| 229.0087   | 1.423965397     | 19.5 | 257766.72      | 1 | 19 |
| 240.0007   | 0.629581893     | 21   | 409189.44      | 0 | 20 |
| 241.0086   | 0.938141677     | 20.5 | 268580.7       | 1 | 20 |
| 252.0008   | 0.996426401     | 22   | 3238500.34     | 0 | 21 |
| 264.0009   | 1.329921477     | 23   | 202807.35      | 0 | 22 |
| 276.0007   | 0.547462679     | 24   | 657326.69      | 0 | 23 |
| 300.0006   | 0.170333022     | 26   | 462346.94      | 0 | 25 |
| 312.0008   | 0.804806276     | 27   | 54765.17       | 0 | 26 |
| 324.0006   | 0.157715782     | 28   | 110204.74      | 0 | 27 |
| 348.0007   | 0.434194717     | 30   | 74614.78       | 0 | 29 |

b)

| Mass (m/z) | Deviation (ppm) | DBE | Intensity (AU) | H | C |
|------------|-----------------|-----|----------------|---|---|
| 84.0003    | -2.963075876    | 8   | 233008645      | 0 | 7 |
| 96.0004    | -1.551032798    | 9   | 1577618743     | 0 | 8 |
| 97.0082    | -1.792628749    | 8.5 | 566131085.7    | 1 | 8 |

|          |              |      |             |   |    |
|----------|--------------|------|-------------|---|----|
| 108.0005 | -0.452775477 | 10   | 423487212.1 | 0 | 9  |
| 109.0083 | -0.677929569 | 9.5  | 71678193.06 | 1 | 9  |
| 120.0005 | -0.407498136 | 11   | 343602244.3 | 0 | 10 |
| 121.0083 | -0.610701537 | 10.5 | 399600885   | 1 | 10 |
| 132.0004 | -1.128025612 | 12   | 137607509.1 | 0 | 11 |
| 133.0083 | -0.555604116 | 11.5 | 45786573.46 | 1 | 11 |
| 144.0004 | -1.034023836 | 13   | 428616341.1 | 0 | 12 |
| 145.0082 | -1.199241088 | 12.5 | 245485284.7 | 1 | 12 |
| 156.0004 | -0.954483821 | 14   | 90655083.09 | 0 | 13 |
| 157.0082 | -1.107584237 | 13.5 | 21511039.46 | 1 | 13 |
| 168.0004 | -0.886306628 | 15   | 45016093.82 | 0 | 14 |
| 169.0082 | -1.028943099 | 14.5 | 91134843.84 | 1 | 14 |
| 180.0004 | -0.8272197   | 16   | 14954606.88 | 0 | 15 |
| 181.0083 | -0.408268405 | 15.5 | 11988359.59 | 1 | 15 |
| 192.0004 | -0.775518616 | 17   | 18492551.57 | 0 | 16 |
| 193.0082 | -0.900997177 | 16.5 | 43210306.29 | 1 | 16 |
| 204.0003 | -1.220094756 | 18   | 35551840.38 | 0 | 17 |
| 205.0082 | -0.848258033 | 17.5 | 4315434.88  | 1 | 17 |
| 216.0003 | -1.152311887 | 19   | 12037073.81 | 0 | 18 |
| 217.0082 | -0.801351565 | 18.5 | 7850087.8   | 1 | 18 |
| 228.0004 | -0.653068603 | 20   | 12510637.33 | 0 | 19 |
| 229.0082 | -0.759360879 | 19.5 | 1970917.51  | 1 | 19 |
| 240.0005 | -0.203749534 | 21   | 4900414.46  | 0 | 20 |
| 241.0083 | -0.30662835  | 20.5 | 2772360.22  | 1 | 20 |
| 252.0005 | -0.194047196 | 22   | 12129226.89 | 0 | 21 |
| 253.0084 | 0.103158641  | 21.5 | 658870.99   | 1 | 21 |
| 264.0005 | -0.185226888 | 23   | 2528673.91  | 0 | 22 |
| 265.0085 | 0.47583402   | 22.5 | 214436.82   | 1 | 22 |
| 276.0004 | -0.539491681 | 24   | 4555222.04  | 0 | 23 |
| 277.0083 | -0.266778939 | 23.5 | 247192.07   | 1 | 23 |
| 288.0005 | -0.169791343 | 25   | 388118.88   | 0 | 24 |
| 289.0084 | 0.090308802  | 24.5 | 19991.96    | 1 | 24 |
| 300.0004 | -0.496332425 | 26   | 3071755.38  | 0 | 25 |
| 301.0083 | -0.24550812  | 25.5 | 44661.78    | 1 | 25 |
| 312.0005 | -0.156730494 | 27   | 76152.22    | 0 | 26 |
| 324.0003 | -0.768208575 | 28   | 603586.75   | 0 | 27 |
| 325.0082 | -0.535063137 | 27.5 | 16584.61    | 1 | 27 |
| 336.0005 | -0.145535477 | 29   | 15204.51    | 0 | 28 |
| 348.0003 | -0.715228757 | 30   | 233488.43   | 0 | 29 |
| 349.0089 | 1.507413688  | 29.5 | 8312.38     | 1 | 29 |
| 372.0001 | -1.20671865  | 32   | 24876.07    | 0 | 31 |
| 373.0078 | -1.538571357 | 31.5 | 9411.76     | 1 | 31 |
| 396.0001 | -1.133584287 | 34   | 11083.39    | 0 | 33 |
| 397.0084 | 0.065741686  | 33.5 | 5663.28     | 1 | 33 |
| 421.0089 | 1.24961885   | 35.5 | 9737.02     | 1 | 35 |
| 816      | -0.672671116 | 69   | 6518.44     | 0 | 68 |

|          |              |    |         |   |    |
|----------|--------------|----|---------|---|----|
| 911.9995 | -1.150108957 | 77 | 6587.79 | 0 | 76 |
| 935.9997 | -0.906943913 | 79 | 6150.25 | 0 | 78 |
| 1032     | -0.144282869 | 87 | 6210.61 | 0 | 86 |

c)

| Mass (m/z) | Deviation (ppm) | DBE  | Intensity (AU) | H | C  |
|------------|-----------------|------|----------------|---|----|
| 84.0003    | -2.96308        | 8    | 220744.68      | 0 | 7  |
| 85.0082    | -2.04568        | 7.5  | 88965.29       | 1 | 7  |
| 96.0005    | -0.50937        | 9    | 2081249.49     | 0 | 8  |
| 97.0084    | 0.269049        | 8.5  | 2095862.24     | 1 | 8  |
| 108.0006   | 0.473146        | 10   | 427641.02      | 0 | 9  |
| 109.0085   | 1.156792        | 9.5  | 197975.13      | 1 | 9  |
| 120.0005   | -0.4075         | 11   | 231114.71      | 0 | 10 |
| 121.0084   | 0.215688        | 10.5 | 666231.3       | 1 | 10 |
| 132.0006   | 0.38712         | 12   | 51597.92       | 0 | 11 |
| 133.0085   | 0.948061        | 11.5 | 69689.98       | 1 | 11 |
| 144.0005   | -0.33958        | 13   | 148719.99      | 0 | 12 |
| 145.0084   | 0.17999         | 12.5 | 166873.93      | 1 | 12 |
| 156.0005   | -0.31346        | 14   | 11353.74       | 0 | 13 |
| 157.0085   | 0.803142        | 13.5 | 17278.84       | 1 | 13 |
| 168.0006   | 0.304166        | 15   | 4698.32        | 0 | 14 |
| 169.0086   | 1.337804        | 14.5 | 43480.13       | 1 | 14 |
| 181.0088   | 2.354035        | 15.5 | 25599.2        | 1 | 15 |
| 193.0086   | 1.171452        | 16.5 | 12505.87       | 1 | 16 |
| 205.0087   | 1.590667        | 17.5 | 6963.24        | 1 | 17 |

**Supplementary Table 7:** Output from SIMSMFP on all species containing two oxygen atoms ( $C_nH_nO_2^-$ ) found in negative ion depth profile datasets from different engine deposits. a. injector tip 1, b. injector tip 2, c. injector needle 1.

a)

| Mass (m/z) | Deviation (ppm) | DBE | Intensity (AU) | H | C | O |
|------------|-----------------|-----|----------------|---|---|---|
| 85.0293    | -2.397991175    | 2.5 | 1370786.86     | 5 | 4 | 2 |
| 87.045     | -1.768047882    | 1.5 | 113545.11      | 7 | 4 | 2 |
| 92.9981    | -1.117225878    | 5.5 | 344621.86      | 1 | 5 | 2 |
| 95.0138    | -0.567285693    | 4.5 | 9766088.82     | 3 | 5 | 2 |
| 97.0295    | -0.04019396     | 3.5 | 4687395.61     | 5 | 5 | 2 |
| 99.0451    | -0.544196237    | 2.5 | 915249.95      | 7 | 5 | 2 |
| 101.0608   | -0.038590629    | 1.5 | 557410.88      | 9 | 5 | 2 |
| 106.0061   | 0.670716569     | 6   | 66532.37       | 2 | 6 | 2 |
| 107.0139   | 0.430785345     | 5.5 | 2497676.93     | 3 | 6 | 2 |
| 108.0217   | 0.195331161     | 5   | 17538290.93    | 4 | 6 | 2 |
| 109.0296   | 0.881412797     | 4.5 | 34608272.52    | 5 | 6 | 2 |
| 111.0452   | 0.415146437     | 3.5 | 5720464.39     | 7 | 6 | 2 |

|          |              |      |             |    |    |   |
|----------|--------------|------|-------------|----|----|---|
| 113.0609 | 0.849985111  | 2.5  | 393019.77   | 9  | 6  | 2 |
| 115.0765 | 0.400603238  | 1.5  | 128886.08   | 11 | 6  | 2 |
| 119.0139 | 0.387349863  | 6.5  | 9266409.52  | 3  | 7  | 2 |
| 120.0217 | 0.175801573  | 6    | 192608.51   | 4  | 7  | 2 |
| 121.0295 | -0.032223548 | 5.5  | 91263656.71 | 5  | 7  | 2 |
| 122.0374 | 0.582608622  | 5    | 11642479.93 | 6  | 7  | 2 |
| 123.0452 | 0.374659209  | 4.5  | 26783866.46 | 7  | 7  | 2 |
| 125.0608 | -0.031184831 | 3.5  | 2146662.77  | 9  | 7  | 2 |
| 127.0765 | 0.362773737  | 2.5  | 245015.27   | 11 | 7  | 2 |
| 129.0921 | -0.030210988 | 1.5  | 128085.53   | 13 | 7  | 2 |
| 131.0139 | 0.351871185  | 7.5  | 698269.57   | 3  | 8  | 2 |
| 132.0217 | 0.159822237  | 7    | 3597370.41  | 4  | 8  | 2 |
| 133.0295 | -0.029316805 | 6.5  | 26633213.8  | 5  | 8  | 2 |
| 134.0374 | 0.530449246  | 6    | 2325149.15  | 6  | 8  | 2 |
| 135.0452 | 0.341367303  | 5.5  | 53350172.68 | 7  | 8  | 2 |
| 136.053  | 0.155086644  | 5    | 1194002.74  | 8  | 8  | 2 |
| 137.0608 | -0.028454525 | 4.5  | 8268800.02  | 9  | 8  | 2 |
| 139.0765 | 0.331472357  | 3.5  | 508869.49   | 11 | 8  | 2 |
| 141.0921 | -0.027641519 | 2.5  | 345456.94   | 13 | 8  | 2 |
| 143.0138 | -0.376886564 | 8.5  | 690911.49   | 3  | 9  | 2 |
| 143.1077 | -0.37663927  | 1.5  | 187329.08   | 15 | 8  | 2 |
| 144.0217 | 0.146505722  | 8    | 103408.16   | 4  | 9  | 2 |
| 145.0295 | -0.02689108  | 7.5  | 66960312.63 | 5  | 9  | 2 |
| 146.0373 | -0.197894608 | 7    | 2886402.26  | 6  | 9  | 2 |
| 147.0452 | 0.313509142  | 6.5  | 38229562.84 | 7  | 9  | 2 |
| 148.053  | 0.142516551  | 6    | 583201.08   | 8  | 9  | 2 |
| 149.0608 | -0.02616382  | 5.5  | 18190842.79 | 9  | 9  | 2 |
| 150.0686 | -0.192578557 | 5    | 51051.78    | 10 | 9  | 2 |
| 151.0764 | -0.356773002 | 4.5  | 1507044.97  | 11 | 9  | 2 |
| 153.0921 | -0.025474861 | 3.5  | 123122.68   | 13 | 9  | 2 |
| 155.0139 | 0.297392774  | 9.5  | 70235.07    | 3  | 10 | 2 |
| 155.1078 | 0.297212737  | 2.5  | 227709.1    | 15 | 9  | 2 |
| 156.0217 | 0.135237617  | 9    | 292229.67   | 4  | 10 | 2 |
| 157.0295 | -0.024836097 | 8.5  | 5363201.25  | 5  | 10 | 2 |
| 157.1234 | -0.024821255 | 1.5  | 102641.27   | 17 | 9  | 2 |
| 158.0373 | -0.182868188 | 8    | 14616324.53 | 6  | 10 | 2 |
| 159.0451 | -0.338897469 | 7.5  | 67934079.9  | 7  | 10 | 2 |
| 160.053  | 0.131831348  | 7    | 841279.15   | 8  | 10 | 2 |
| 161.0608 | -0.024214458 | 6.5  | 16069563.51 | 9  | 10 | 2 |
| 162.0687 | 0.438703039  | 6    | 69756.26    | 10 | 10 | 2 |
| 163.0765 | 0.282689492  | 5.5  | 4319741.06  | 11 | 10 | 2 |
| 165.0921 | -0.023623177 | 4.5  | 374114.11   | 13 | 10 | 2 |
| 167.0139 | 0.276025006  | 10.5 | 51033.91    | 3  | 11 | 2 |
| 167.1079 | 0.874286181  | 3.5  | 63447.8     | 15 | 10 | 2 |
| 168.0218 | 0.720740328  | 10   | 52137.72    | 4  | 11 | 2 |
| 169.0295 | -0.023072895 | 9.5  | 14368242.29 | 5  | 11 | 2 |

|          |              |      |             |    |    |   |
|----------|--------------|------|-------------|----|----|---|
| 169.1235 | 0.568224136  | 2.5  | 70100.72    | 17 | 10 | 2 |
| 170.0374 | 0.418143477  | 9    | 673414.04   | 6  | 11 | 2 |
| 171.0452 | 0.269519474  | 8.5  | 36042795.12 | 7  | 11 | 2 |
| 171.1391 | 0.269371595  | 1.5  | 86044.63    | 19 | 10 | 2 |
| 172.053  | 0.122636644  | 8    | 6038646.1   | 8  | 11 | 2 |
| 173.0608 | -0.022535432 | 7.5  | 32364607.72 | 9  | 11 | 2 |
| 174.0687 | 0.408459585  | 7    | 110152.31   | 10 | 11 | 2 |
| 175.0765 | 0.263313535  | 6.5  | 6766009.57  | 11 | 11 | 2 |
| 177.0921 | -0.022022439 | 5.5  | 831946.41   | 13 | 11 | 2 |
| 179.1078 | 0.257386958  | 4.5  | 86495.8     | 15 | 11 | 2 |
| 180.0218 | 0.672696759  | 11   | 53101.4     | 4  | 12 | 2 |
| 181.0296 | 0.530852695  | 10.5 | 783907.56   | 5  | 12 | 2 |
| 181.1236 | 1.082687249  | 3.5  | 58836.73    | 17 | 11 | 2 |
| 182.0374 | 0.390579231  | 10   | 10125092.38 | 6  | 12 | 2 |
| 183.0452 | 0.251850426  | 9.5  | 23542331.2  | 7  | 12 | 2 |
| 183.1391 | 0.251721296  | 2.5  | 61896.11    | 19 | 11 | 2 |
| 184.053  | 0.114640904  | 9    | 2104816.94  | 8  | 12 | 2 |
| 185.0608 | -0.021074155 | 8.5  | 27829054.48 | 9  | 12 | 2 |
| 186.0687 | 0.382117074  | 8    | 713322.75   | 10 | 12 | 2 |
| 187.0765 | 0.246423315  | 7.5  | 9680661.89  | 11 | 12 | 2 |
| 189.0922 | 0.508217942  | 6.5  | 1388969.73  | 13 | 12 | 2 |
| 191.1079 | 0.764490174  | 5.5  | 173384.08   | 15 | 12 | 2 |
| 193.0296 | 0.497851354  | 11.5 | 2033022.41  | 5  | 13 | 2 |
| 194.0374 | 0.366424339  | 11   | 144953.03   | 6  | 13 | 2 |
| 195.0452 | 0.236355526  | 10.5 | 35123799.92 | 7  | 13 | 2 |
| 196.053  | 0.10762397   | 10   | 5062305.47  | 8  | 13 | 2 |
| 197.0609 | 0.487666741  | 9.5  | 23947939.87 | 9  | 13 | 2 |
| 197.1547 | -0.01978142  | 2.5  | 55766.83    | 21 | 12 | 2 |
| 198.0687 | 0.358966487  | 9    | 603286.59   | 10 | 13 | 2 |
| 199.0765 | 0.231569325  | 8.5  | 11645711.12 | 11 | 13 | 2 |
| 199.1704 | 0.23146015   | 1.5  | 201411.21   | 23 | 12 | 2 |
| 200.0843 | 0.105455562  | 8    | 104307.92   | 12 | 13 | 2 |
| 200.9986 | 1.970664376  | 14.5 | 4144506.24  | 1  | 14 | 2 |
| 201.0922 | 0.47789047   | 7.5  | 1941899.94  | 13 | 13 | 2 |
| 203.1079 | 0.719322612  | 6.5  | 249008.21   | 15 | 13 | 2 |
| 205.0298 | 1.444182395  | 12.5 | 372502.28   | 5  | 14 | 2 |
| 205.1235 | 0.468498466  | 5.5  | 75703.69    | 17 | 13 | 2 |
| 206.0374 | 0.345083099  | 12   | 808583.65   | 6  | 14 | 2 |
| 207.0453 | 0.705643176  | 11.5 | 5424227.8   | 7  | 14 | 2 |
| 208.0531 | 0.582063283  | 11   | 7496205.51  | 8  | 14 | 2 |
| 209.0609 | 0.45967488   | 10.5 | 36149233.92 | 9  | 14 | 2 |
| 210.0688 | 0.814495724  | 10   | 1144842.82  | 10 | 14 | 2 |
| 211.0766 | 0.692166262  | 9.5  | 12943201.22 | 11 | 14 | 2 |
| 211.9908 | 1.986410903  | 16   | 180827.36   | 0  | 15 | 2 |
| 212.0844 | 0.570999419  | 9    | 114943.38   | 12 | 14 | 2 |
| 213.0923 | 0.920259345  | 8.5  | 3224798.66  | 13 | 14 | 2 |

|          |              |      |             |    |    |   |
|----------|--------------|------|-------------|----|----|---|
| 213.1862 | 0.919854007  | 1.5  | 150912.62   | 25 | 13 | 2 |
| 215.1079 | 0.679194484  | 7.5  | 384361.48   | 15 | 14 | 2 |
| 217.0298 | 1.364330631  | 13.5 | 619337.83   | 5  | 15 | 2 |
| 217.1235 | 0.442605441  | 6.5  | 100676      | 17 | 14 | 2 |
| 219.0453 | 0.666985767  | 12.5 | 11856452.61 | 7  | 15 | 2 |
| 220.0531 | 0.550322021  | 12   | 1095059.26  | 8  | 15 | 2 |
| 221.0609 | 0.434722023  | 11.5 | 19126275.94 | 9  | 15 | 2 |
| 222.0688 | 0.770482534  | 11   | 3674850.47  | 10 | 15 | 2 |
| 223.0766 | 0.654932412  | 10.5 | 18604856.98 | 11 | 15 | 2 |
| 224.0844 | 0.540421669  | 10   | 189793.4    | 12 | 15 | 2 |
| 225.0923 | 0.87119893   | 9.5  | 4348558.36  | 13 | 15 | 2 |
| 226.0998 | -0.570101904 | 9    | 55326.29    | 14 | 15 | 2 |
| 227.1079 | 0.643306965  | 8.5  | 693649.79   | 15 | 15 | 2 |
| 227.2019 | 1.083178735  | 1.5  | 600449.28   | 27 | 14 | 2 |
| 229.1236 | 0.855870665  | 7.5  | 86977.52    | 17 | 15 | 2 |
| 230.0376 | 1.178504381  | 14   | 87711.84    | 6  | 16 | 2 |
| 231.0455 | 1.497975587  | 13.5 | 1029999.59  | 7  | 16 | 2 |
| 232.0532 | 0.952799662  | 13   | 7158741.86  | 8  | 16 | 2 |
| 233.061  | 0.841411326  | 12.5 | 15655435.8  | 9  | 16 | 2 |
| 234.0689 | 1.158207323  | 12   | 1310555.21  | 10 | 16 | 2 |
| 235.0767 | 1.046893451  | 11.5 | 15885080.07 | 11 | 16 | 2 |
| 236.0845 | 0.936529959  | 11   | 560575.64   | 12 | 16 | 2 |
| 237.0923 | 0.827104727  | 10.5 | 5782637.63  | 13 | 16 | 2 |
| 238.0065 | 1.979361624  | 17   | 115434.36   | 2  | 17 | 2 |
| 239.108  | 1.029243075  | 9.5  | 906362.57   | 15 | 16 | 2 |
| 241.1237 | 1.228001908  | 8.5  | 138032.18   | 17 | 16 | 2 |
| 241.2176 | 1.227523877  | 1.5  | 758434.11   | 29 | 15 | 2 |
| 243.0456 | 1.835461406  | 14.5 | 3920649.03  | 7  | 17 | 2 |
| 244.0534 | 1.725445032  | 14   | 161794.79   | 8  | 17 | 2 |
| 245.0611 | 1.208271561  | 13.5 | 16839310.86 | 9  | 17 | 2 |
| 246.0689 | 1.101725162  | 13   | 4026534.08  | 10 | 17 | 2 |
| 247.0768 | 1.400780991  | 12.5 | 12615759.47 | 11 | 17 | 2 |
| 248.0845 | 0.891229388  | 12   | 508334.1    | 12 | 17 | 2 |
| 249.0924 | 1.188716926  | 11.5 | 6605464.18  | 13 | 17 | 2 |
| 250.1001 | 0.684126544  | 11   | 94738.28    | 14 | 17 | 2 |
| 251.1081 | 1.378292763  | 10.5 | 1044726.48  | 15 | 17 | 2 |
| 253.1238 | 1.564849373  | 9.5  | 164502.19   | 17 | 17 | 2 |
| 253.2177 | 1.564269084  | 2.5  | 212453.93   | 29 | 16 | 2 |
| 255.2333 | 1.356016121  | 1.5  | 21770341.06 | 31 | 16 | 2 |
| 256.0533 | 1.254037353  | 15   | 1482357.34  | 8  | 18 | 2 |
| 257.0613 | 1.929893599  | 14.5 | 5213393.92  | 9  | 18 | 2 |
| 258.069  | 1.437989583  | 14   | 2298345.42  | 10 | 18 | 2 |
| 259.0769 | 1.721885541  | 13.5 | 16964829.89 | 11 | 18 | 2 |
| 260.0846 | 1.234599805  | 13   | 859755.17   | 12 | 18 | 2 |
| 261.0925 | 1.517089158  | 12.5 | 5998090.21  | 13 | 18 | 2 |
| 262.1    | 0.271270581  | 12   | 124828.65   | 14 | 18 | 2 |

|          |              |      |            |    |    |   |
|----------|--------------|------|------------|----|----|---|
| 263.1082 | 1.695503053  | 11.5 | 1519784.63 | 15 | 18 | 2 |
| 265.1239 | 1.871204098  | 10.5 | 223410.71  | 17 | 18 | 2 |
| 267.1395 | 1.669916822  | 9.5  | 64100.35   | 19 | 18 | 2 |
| 267.2334 | 1.669330049  | 2.5  | 53403.26   | 31 | 17 | 2 |
| 269.0613 | 1.843821147  | 15.5 | 8139332.96 | 9  | 19 | 2 |
| 269.2491 | 1.842535088  | 1.5  | 899511.9   | 33 | 17 | 2 |
| 270.069  | 1.374095175  | 15   | 1249119.48 | 10 | 19 | 2 |
| 272.0847 | 1.547682217  | 14   | 1254604.73 | 12 | 19 | 2 |
| 273.0926 | 1.816603237  | 13.5 | 7665320.29 | 13 | 19 | 2 |
| 274.1002 | 0.989055346  | 13   | 184187.79  | 14 | 19 | 2 |
| 275.1083 | 1.985040379  | 12.5 | 1515748.03 | 15 | 19 | 2 |
| 276.1155 | -0.285749903 | 12   | 51648.78   | 16 | 19 | 2 |
| 277.1237 | 1.06847706   | 11.5 | 263204.79  | 17 | 19 | 2 |
| 278.0377 | 1.334712865  | 18   | 81826.58   | 6  | 20 | 2 |
| 279.0457 | 1.957030941  | 17.5 | 1117703.37 | 7  | 20 | 2 |
| 279.1395 | 1.598128222  | 10.5 | 66130.92   | 19 | 19 | 2 |
| 279.2333 | 1.239466887  | 3.5  | 55781.5    | 31 | 18 | 2 |
| 280.0531 | 0.432418182  | 17   | 304538.02  | 8  | 20 | 2 |
| 281.0612 | 1.40930359   | 16.5 | 1231788.19 | 9  | 20 | 2 |
| 281.2489 | 1.052805226  | 2.5  | 802435.68  | 33 | 18 | 2 |
| 282.0689 | 0.961113616  | 16   | 2302779.69 | 10 | 20 | 2 |
| 283.0768 | 1.222637896  | 15.5 | 8351641.21 | 11 | 20 | 2 |
| 283.2646 | 1.221827305  | 1.5  | 29122657.2 | 35 | 18 | 2 |
| 283.9908 | 1.482796712  | 22   | 57618.58   | 0  | 21 | 2 |
| 284.0843 | 0.074273733  | 15   | 770373.76  | 12 | 20 | 2 |
| 285.0925 | 1.389375555  | 14.5 | 6146068.35 | 13 | 20 | 2 |
| 286.0066 | 1.996811054  | 21   | 112882.36  | 2  | 21 | 2 |
| 286.1    | 0.248514567  | 14   | 272042.35  | 14 | 20 | 2 |
| 287.1082 | 1.553772038  | 13.5 | 2082705.7  | 15 | 20 | 2 |
| 288.1155 | -0.273848434 | 13   | 58526.27   | 16 | 20 | 2 |
| 289.1239 | 1.715876312  | 12.5 | 334408.59  | 17 | 20 | 2 |
| 292.0524 | -1.982174612 | 18   | 222160.71  | 8  | 21 | 2 |
| 293.0613 | 1.692822764  | 17.5 | 2847064.56 | 9  | 21 | 2 |
| 294.0684 | -0.778389728 | 17   | 586418.83  | 10 | 21 | 2 |
| 295.0766 | 0.495125918  | 16.5 | 5218706.18 | 11 | 21 | 2 |
| 296.0843 | 0.071263493  | 16   | 1657166.45 | 12 | 21 | 2 |
| 296.9986 | 1.333678099  | 22.5 | 57881.28   | 1  | 22 | 2 |
| 297.0923 | 0.660064665  | 15.5 | 5123522.01 | 13 | 21 | 2 |
| 297.2799 | -0.013118949 | 1.5  | 70865.68   | 37 | 19 | 2 |
| 298.0065 | 1.580840501  | 22   | 79466.47   | 2  | 22 | 2 |
| 298.0996 | -1.103321296 | 15   | 298496.04  | 14 | 21 | 2 |
| 299.0144 | 1.826336783  | 21.5 | 1186500.56 | 3  | 22 | 2 |
| 299.108  | 0.822780409  | 14.5 | 2325102.42 | 15 | 21 | 2 |
| 299.2019 | 0.822522191  | 7.5  | 163356     | 27 | 20 | 2 |
| 300.0221 | 1.403565241  | 21   | 191122.59  | 4  | 22 | 2 |
| 300.1153 | -0.929308638 | 14   | 69980.5    | 16 | 21 | 2 |

|          |              |      |            |    |    |   |
|----------|--------------|------|------------|----|----|---|
| 301.03   | 1.64801122   | 20.5 | 1345190.92 | 5  | 22 | 2 |
| 301.1237 | 0.98331779   | 13.5 | 406744.62  | 17 | 21 | 2 |
| 301.2175 | 0.651025016  | 6.5  | 217653.22  | 29 | 20 | 2 |
| 302.0377 | 1.228656078  | 20   | 87640.55   | 6  | 22 | 2 |
| 303.0457 | 1.802041686  | 19.5 | 1285578.38 | 7  | 22 | 2 |
| 303.1395 | 1.471601875  | 12.5 | 98492.24   | 19 | 21 | 2 |
| 304.053  | 0.069395801  | 19   | 123798.29  | 8  | 22 | 2 |
| 305.0613 | 1.626233176  | 18.5 | 1758170.09 | 9  | 22 | 2 |
| 305.1551 | 1.29803013   | 11.5 | 52305.15   | 21 | 21 | 2 |
| 306.0687 | 0.232300841  | 18   | 1184276.62 | 10 | 22 | 2 |
| 307.0767 | 0.80142908   | 17.5 | 3053513.31 | 11 | 22 | 2 |
| 308.0841 | -0.580685261 | 17   | 903819.46  | 12 | 22 | 2 |
| 309.0924 | 0.957966885  | 16.5 | 4704320.08 | 13 | 22 | 2 |
| 310.0066 | 1.842222237  | 23   | 63516.81   | 2  | 23 | 2 |
| 310.0999 | -0.093195765 | 16   | 501239.33  | 14 | 22 | 2 |
| 311.1081 | 1.11247629   | 15.5 | 1960060.99 | 15 | 22 | 2 |
| 311.2958 | 0.790567025  | 1.5  | 1199608    | 39 | 20 | 2 |
| 312.0222 | 1.670076265  | 22   | 152984.73  | 4  | 23 | 2 |
| 312.1155 | -0.25279097  | 15   | 105166.45  | 16 | 22 | 2 |
| 313.0301 | 1.904293342  | 21.5 | 1427444.93 | 5  | 23 | 2 |
| 313.1238 | 1.264996468  | 14.5 | 530091.5   | 17 | 22 | 2 |
| 313.2176 | 0.94535007   | 7.5  | 497214.7   | 29 | 21 | 2 |
| 314.0379 | 1.818573614  | 21   | 153550.09  | 6  | 23 | 2 |
| 315.1395 | 1.415565587  | 13.5 | 118128.21  | 19 | 22 | 2 |
| 316.0524 | -1.83165494  | 20   | 126622.78  | 8  | 23 | 2 |
| 317.061  | 0.618493354  | 19.5 | 1249928.9  | 9  | 23 | 2 |
| 319.0765 | 0.14447948   | 18.5 | 3737332.85 | 11 | 23 | 2 |
| 320.084  | -0.871333016 | 18   | 834450.03  | 12 | 23 | 2 |
| 321.0921 | -0.012146048 | 17.5 | 2614669.82 | 13 | 23 | 2 |
| 322.0996 | -1.021111681 | 17   | 425745.81  | 14 | 23 | 2 |
| 323.0142 | 1.071471071  | 23.5 | 131262.55  | 3  | 24 | 2 |
| 323.1078 | 0.142676861  | 16.5 | 1765465.41 | 15 | 23 | 2 |
| 324.022  | 0.990983076  | 23   | 88338.31   | 4  | 24 | 2 |
| 324.1151 | -1.477559337 | 16   | 94869.04   | 16 | 23 | 2 |
| 325.0299 | 1.218658599  | 22.5 | 1433284.25 | 5  | 24 | 2 |
| 325.1235 | 0.295580075  | 15.5 | 445106.76  | 17 | 23 | 2 |
| 325.3114 | 0.602807397  | 1.5  | 101872.39  | 41 | 21 | 2 |
| 326.0376 | 0.831499881  | 22   | 112406.99  | 6  | 24 | 2 |
| 327.0456 | 1.364031831  | 21.5 | 885407.42  | 7  | 24 | 2 |
| 327.1393 | 0.752279488  | 14.5 | 130638.05  | 19 | 23 | 2 |
| 328.0531 | 0.369147692  | 21   | 86177.48   | 8  | 24 | 2 |
| 329.0611 | 0.899833698  | 20.5 | 539014.13  | 9  | 24 | 2 |
| 330.0685 | -0.390524845 | 20   | 359205.57  | 10 | 24 | 2 |
| 331.0766 | 0.4412878    | 19.5 | 1151111.29 | 11 | 24 | 2 |
| 332.084  | -0.839847044 | 19   | 795810.35  | 12 | 24 | 2 |
| 333.0923 | 0.588726054  | 18.5 | 3265493.71 | 13 | 24 | 2 |



|          |              |      |            |    |    |   |
|----------|--------------|------|------------|----|----|---|
| 334.0996 | -0.984436007 | 18   | 417264.45  | 14 | 24 | 2 |
| 335.108  | 0.734390646  | 17.5 | 1407175.79 | 15 | 24 | 2 |
| 336.022  | 0.955593107  | 24   | 68550.42   | 4  | 25 | 2 |
| 336.1153 | -0.829774094 | 17   | 131012.88  | 16 | 24 | 2 |
| 337.0301 | 1.768687884  | 23.5 | 357967.66  | 5  | 25 | 2 |
| 337.1237 | 0.878313391  | 16.5 | 512676.5   | 17 | 24 | 2 |
| 338.0378 | 1.393633069  | 23   | 103406.21  | 6  | 25 | 2 |
| 339.0455 | 1.020807984  | 22.5 | 1182262.92 | 7  | 25 | 2 |
| 339.1392 | 0.430796743  | 15.5 | 124186.46  | 19 | 24 | 2 |
| 339.3268 | -0.158843898 | 1.5  | 1681236    | 43 | 22 | 2 |
| 340.0529 | -0.23202267  | 22   | 91197.08   | 8  | 25 | 2 |
| 341.0611 | 0.868173641  | 21.5 | 663588.67  | 9  | 25 | 2 |
| 341.1552 | 1.454178982  | 14.5 | 59019.95   | 21 | 24 | 2 |
| 343.0765 | 0.134372381  | 20.5 | 1524736.61 | 11 | 25 | 2 |
| 344.0838 | -1.391810174 | 20   | 445207.87  | 12 | 25 | 2 |
| 345.0922 | 0.27847638   | 19.5 | 1682577.18 | 13 | 25 | 2 |
| 346.0996 | -0.950303576 | 19   | 547570.74  | 14 | 25 | 2 |
| 347.1079 | 0.42090676   | 18.5 | 1582410.15 | 15 | 25 | 2 |
| 348.0223 | 1.784658938  | 25   | 69397.78   | 4  | 26 | 2 |
| 348.116  | 1.209655716  | 18   | 911232.33  | 16 | 25 | 2 |
| 349.0299 | 1.134861081  | 24.5 | 173274.12  | 5  | 26 | 2 |
| 349.1236 | 0.561692507  | 17.5 | 468566.52  | 17 | 25 | 2 |
| 350.0376 | 0.774488826  | 24   | 85746.51   | 6  | 26 | 2 |
| 351.0456 | 1.270776694  | 23.5 | 445217.84  | 7  | 26 | 2 |
| 351.1393 | 0.700861944  | 16.5 | 121591.67  | 19 | 25 | 2 |
| 352.0532 | 0.628030476  | 23   | 83150.54   | 8  | 26 | 2 |
| 353.0612 | 1.121903071  | 22.5 | 628444.53  | 9  | 26 | 2 |
| 353.1549 | 0.555280725  | 15.5 | 49458.9    | 21 | 25 | 2 |
| 353.3426 | 0.271974073  | 1.5  | 385881.81  | 45 | 23 | 2 |
| 354.0685 | -0.364053716 | 22   | 161498.8   | 10 | 26 | 2 |
| 355.0767 | 0.693090171  | 21.5 | 562291.22  | 11 | 26 | 2 |
| 356.084  | -0.783241543 | 21   | 538175.18  | 12 | 26 | 2 |
| 357.0923 | 0.54915804   | 20.5 | 1309585.82 | 13 | 26 | 2 |
| 358.0995 | -1.197710375 | 20   | 387054.96  | 14 | 26 | 2 |
| 359.1079 | 0.406841675  | 19.5 | 1159544.18 | 15 | 26 | 2 |
| 360.0221 | 1.169651787  | 26   | 50123.65   | 4  | 27 | 2 |
| 360.1153 | -0.774473576 | 19   | 198055.75  | 16 | 26 | 2 |
| 361.0301 | 1.651111595  | 25.5 | 89144.23   | 5  | 27 | 2 |
| 361.1236 | 0.543027668  | 18.5 | 466911.42  | 17 | 26 | 2 |
| 362.0376 | 0.748817811  | 25   | 61093.01   | 6  | 27 | 2 |
| 362.1313 | 0.196337665  | 18   | 69173.69   | 18 | 26 | 2 |
| 363.0457 | 1.504220602  | 24.5 | 263852.05  | 7  | 27 | 2 |
| 363.1394 | 0.953078432  | 17.5 | 125644.93  | 19 | 26 | 2 |
| 364.0532 | 0.607329188  | 24   | 71629.57   | 8  | 27 | 2 |
| 365.0611 | 0.811097759  | 23.5 | 370601.78  | 9  | 27 | 2 |
| 365.1551 | 1.084745714  | 16.5 | 55668.42   | 21 | 26 | 2 |

|          |              |      |           |    |    |   |
|----------|--------------|------|-----------|----|----|---|
| 366.0681 | -1.44481105  | 23   | 87640.3   | 10 | 27 | 2 |
| 367.0765 | 0.125586917  | 22.5 | 710126.39 | 11 | 27 | 2 |
| 367.3582 | 0.125490613  | 1.5  | 1885071.5 | 47 | 24 | 2 |
| 368.0837 | -1.57273764  | 22   | 227202.89 | 12 | 27 | 2 |
| 369.0921 | -0.010566468 | 21.5 | 941296.69 | 13 | 27 | 2 |
| 370.0995 | -1.158876202 | 21   | 404327.01 | 14 | 27 | 2 |
| 371.1078 | 0.124222681  | 20.5 | 761312.34 | 15 | 27 | 2 |
| 371.202  | 0.932377311  | 13.5 | 59394.85  | 27 | 26 | 2 |
| 372.1151 | -1.286965736 | 20   | 174550.72 | 16 | 27 | 2 |
| 373.03   | 1.329921614  | 26.5 | 52768.72  | 5  | 28 | 2 |
| 373.1235 | 0.257555541  | 19.5 | 400319.63 | 17 | 27 | 2 |
| 374.0375 | 0.457440974  | 26   | 55758.93  | 6  | 28 | 2 |
| 374.1307 | -1.413675094 | 19   | 56773.32  | 18 | 27 | 2 |
| 375.0456 | 1.189456777  | 25.5 | 154181.49 | 7  | 28 | 2 |
| 375.1392 | 0.389455586  | 18.5 | 126754.22 | 19 | 27 | 2 |
| 376.0532 | 0.587949072  | 25   | 63400.2   | 8  | 28 | 2 |
| 377.0612 | 1.050493703  | 24.5 | 248459.9  | 9  | 28 | 2 |
| 378.0687 | 0.188061094  | 24   | 77585.86  | 10 | 28 | 2 |
| 379.0767 | 0.649209407  | 23.5 | 291072.73 | 11 | 28 | 2 |
| 380.0841 | -0.470685082 | 23   | 267018.33 | 12 | 28 | 2 |
| 381.0922 | 0.252170011  | 22.5 | 554980.61 | 13 | 28 | 2 |
| 381.3739 | 0.251983747  | 1.5  | 695689.69 | 49 | 25 | 2 |
| 382.0995 | -1.122481235 | 22   | 296643.37 | 14 | 28 | 2 |
| 383.1079 | 0.38135485   | 21.5 | 734445.47 | 15 | 28 | 2 |
| 384.1152 | -0.98642185  | 21   | 203370.48 | 16 | 28 | 2 |
| 385.1236 | 0.50918744   | 20.5 | 303874.76 | 17 | 28 | 2 |
| 386.0378 | 1.220348305  | 27   | 49762.55  | 6  | 29 | 2 |
| 386.1307 | -1.369741581 | 20   | 63394.32  | 18 | 28 | 2 |
| 387.0457 | 1.410946486  | 26.5 | 102220.02 | 7  | 29 | 2 |
| 387.1393 | 0.635688902  | 19.5 | 121490.88 | 19 | 28 | 2 |
| 388.0532 | 0.569767563  | 26   | 68593.85  | 8  | 29 | 2 |
| 389.0614 | 1.532151258  | 25.5 | 181148.33 | 9  | 29 | 2 |
| 389.1552 | 1.274814348  | 18.5 | 51770.81  | 21 | 28 | 2 |
| 390.0687 | 0.182275617  | 25   | 78416.2   | 10 | 29 | 2 |
| 391.0769 | 1.140697671  | 24.5 | 279578.37 | 11 | 29 | 2 |
| 392.0841 | -0.456279452 | 24   | 117554.79 | 12 | 29 | 2 |
| 393.0924 | 0.75325858   | 23.5 | 507967.8  | 13 | 29 | 2 |
| 394.0995 | -1.088302658 | 23   | 240479.69 | 14 | 29 | 2 |
| 395.1078 | 0.116677032  | 22.5 | 433519.06 | 15 | 29 | 2 |
| 395.3895 | 0.116593904  | 1.5  | 649384.13 | 51 | 26 | 2 |
| 396.115  | -1.461442142 | 22   | 192287.37 | 16 | 29 | 2 |
| 397.1234 | -0.009820625 | 21.5 | 279262.23 | 17 | 29 | 2 |
| 398.0377 | 0.932324616  | 28   | 46910.19  | 6  | 30 | 2 |
| 398.1308 | -1.077282988 | 21   | 69898.9   | 18 | 29 | 2 |
| 399.0456 | 1.1179186    | 27.5 | 68240.51  | 7  | 30 | 2 |
| 399.1393 | 0.616577099  | 20.5 | 107603.07 | 19 | 29 | 2 |

|          |              |      |           |    |    |   |
|----------|--------------|------|-----------|----|----|---|
| 400.053  | 0.052743014  | 27   | 59292.4   | 8  | 30 | 2 |
| 401.0613 | 1.236969545  | 26.5 | 118873.48 | 9  | 30 | 2 |
| 401.1548 | 0.239558452  | 19.5 | 50198.8   | 21 | 29 | 2 |
| 402.0687 | 0.176835482  | 26   | 60689.18  | 10 | 30 | 2 |
| 403.0767 | 0.610554146  | 25.5 | 163236.31 | 11 | 30 | 2 |
| 404.0841 | -0.442729424 | 25   | 128930.25 | 12 | 30 | 2 |
| 405.0922 | 0.23723      | 24.5 | 246748.65 | 13 | 30 | 2 |
| 406.0996 | -0.809899181 | 24   | 215882.83 | 14 | 30 | 2 |
| 407.1079 | 0.358873047  | 23.5 | 396799.26 | 15 | 30 | 2 |
| 408.1151 | -1.173442095 | 23   | 163834.21 | 16 | 30 | 2 |
| 409.1235 | 0.234892453  | 22.5 | 230397.65 | 17 | 30 | 2 |
| 409.4053 | 0.478987678  | 1.5  | 275536.35 | 53 | 27 | 2 |
| 410.1309 | -0.801938445 | 22   | 77437.29  | 18 | 30 | 2 |
| 411.0458 | 1.571846776  | 28.5 | 46933.87  | 7  | 31 | 2 |
| 411.1393 | 0.598580937  | 21.5 | 97401.25  | 19 | 30 | 2 |
| 412.053  | 0.051207008  | 28   | 50192.2   | 8  | 31 | 2 |
| 413.0615 | 1.685224048  | 27.5 | 92750.76  | 9  | 31 | 2 |
| 414.0688 | 0.413216525  | 27   | 60088.05  | 10 | 31 | 2 |
| 415.077  | 1.315661235  | 26.5 | 149344.5  | 11 | 31 | 2 |
| 416.0841 | -0.42996097  | 26   | 92102.48  | 12 | 31 | 2 |
| 417.0924 | 0.709915142  | 25.5 | 268158.78 | 13 | 31 | 2 |
| 418.0999 | -0.069122231 | 25   | 143366.93 | 14 | 31 | 2 |
| 419.108  | 0.587199826  | 24.5 | 273900.77 | 15 | 31 | 2 |
| 420.1153 | -0.663864932 | 24   | 166717.55 | 16 | 31 | 2 |
| 421.1236 | 0.46565923   | 23.5 | 201997.97 | 17 | 31 | 2 |
| 422.1315 | 0.642217352  | 23   | 96127.51  | 18 | 31 | 2 |
| 423.1393 | 0.581605498  | 22.5 | 99249.64  | 19 | 31 | 2 |
| 423.421  | 0.581218558  | 1.5  | 370966.17 | 55 | 28 | 2 |
| 426.0688 | 0.401578498  | 28   | 58625.35  | 10 | 32 | 2 |
| 427.077  | 1.278693768  | 27.5 | 98679.44  | 11 | 32 | 2 |
| 428.084  | -0.651507224 | 27   | 73841.95  | 12 | 32 | 2 |
| 429.0925 | 0.923111836  | 26.5 | 140042.42 | 13 | 32 | 2 |
| 430.0996 | -0.764706009 | 26   | 152557.51 | 14 | 32 | 2 |
| 431.1079 | 0.338894392  | 25.5 | 214853.35 | 15 | 32 | 2 |
| 432.115  | -1.339687871 | 25   | 134215.94 | 16 | 32 | 2 |
| 433.1236 | 0.452757801  | 24.5 | 174074.33 | 17 | 32 | 2 |
| 434.131  | -0.527259927 | 24   | 83207.15  | 18 | 32 | 2 |
| 435.1393 | 0.565566335  | 23.5 | 77616.51  | 19 | 32 | 2 |
| 436.0533 | 0.736378412  | 30   | 45748.81  | 8  | 33 | 2 |
| 436.1473 | 0.965500432  | 23   | 51646.4   | 20 | 32 | 2 |
| 437.0614 | 1.363883457  | 29.5 | 52119.7   | 9  | 33 | 2 |
| 437.1554 | 1.592342468  | 22.5 | 54888.17  | 21 | 32 | 2 |
| 437.4365 | 0.219689077  | 1.5  | 345253.36 | 57 | 29 | 2 |
| 438.0688 | 0.390578071  | 29   | 58837.24  | 10 | 33 | 2 |
| 439.077  | 1.243746949  | 28.5 | 71110.68  | 11 | 33 | 2 |
| 440.0844 | 0.275174565  | 28   | 53024.35  | 12 | 33 | 2 |

|          |              |      |           |    |    |   |
|----------|--------------|------|-----------|----|----|---|
| 441.0929 | 1.804838475  | 27.5 | 130792.61 | 13 | 33 | 2 |
| 442.0998 | -0.291563042 | 27   | 95302.8   | 14 | 33 | 2 |
| 443.1081 | 0.781074122  | 26.5 | 163824.9  | 15 | 33 | 2 |
| 444.1154 | -0.402823068 | 26   | 120308.41 | 16 | 33 | 2 |
| 445.1236 | 0.440551987  | 25.5 | 137440.12 | 17 | 33 | 2 |
| 446.1309 | -0.737227028 | 25   | 85454.18  | 18 | 33 | 2 |
| 447.1393 | 0.550388068  | 24.5 | 90272.81  | 19 | 33 | 2 |
| 449.1553 | 1.327159651  | 23.5 | 58592.3   | 21 | 33 | 2 |
| 451.0772 | 1.65404333   | 29.5 | 61508.45  | 11 | 34 | 2 |
| 451.4523 | 0.545129871  | 1.5  | 440708.05 | 59 | 30 | 2 |
| 452.0845 | 0.489068101  | 29   | 67686.31  | 12 | 34 | 2 |
| 453.0927 | 1.315626547  | 28.5 | 81506.73  | 13 | 34 | 2 |
| 454.1002 | 0.597005158  | 28   | 89030.97  | 14 | 34 | 2 |
| 456.1153 | -0.611467823 | 27   | 110786.1  | 16 | 34 | 2 |
| 457.1238 | 0.866505623  | 26.5 | 131415.86 | 17 | 34 | 2 |
| 458.131  | -0.4996385   | 26   | 71724.69  | 18 | 34 | 2 |
| 459.1395 | 0.971601079  | 25.5 | 71370.66  | 19 | 34 | 2 |
| 460.1477 | 1.784430228  | 25   | 56129.99  | 20 | 34 | 2 |
| 461.1555 | 1.726318724  | 24.5 | 50820.01  | 21 | 34 | 2 |
| 462.0692 | 1.235963587  | 31   | 50713.06  | 10 | 35 | 2 |
| 464.0841 | -0.385490326 | 30   | 49273.25  | 12 | 35 | 2 |
| 465.4678 | 0.206459007  | 1.5  | 306080.4  | 61 | 31 | 2 |
| 466.0997 | -0.491096406 | 29   | 85634.8   | 14 | 35 | 2 |
| 467.1083 | 1.169109259  | 28.5 | 102548.4  | 15 | 35 | 2 |
| 468.1154 | -0.382170575 | 28   | 84436.22  | 16 | 35 | 2 |
| 469.1237 | 0.631177207  | 27.5 | 109584.03 | 17 | 35 | 2 |
| 470.1317 | 1.00206064   | 27   | 88303.12  | 18 | 35 | 2 |
| 471.1394 | 0.734602655  | 26.5 | 71925.62  | 19 | 35 | 2 |
| 472.1464 | -1.014303009 | 26   | 47692.1   | 20 | 35 | 2 |
| 477.093  | 1.87825368   | 30.5 | 57377.97  | 13 | 36 | 2 |
| 478.1001 | 0.357874975  | 30   | 90538.41  | 14 | 36 | 2 |
| 479.4835 | 0.304702966  | 1.5  | 357146.62 | 63 | 32 | 2 |
| 480.1157 | 0.252230932  | 29   | 63950.21  | 16 | 36 | 2 |
| 481.1243 | 1.862515922  | 28.5 | 90211.99  | 17 | 36 | 2 |
| 482.1313 | 0.147470223  | 28   | 85373.84  | 18 | 36 | 2 |
| 483.14   | 1.958235403  | 27.5 | 62161.12  | 19 | 36 | 2 |
| 493.4993 | 0.600001211  | 1.5  | 397937.35 | 65 | 33 | 2 |
| 494.1315 | 0.548639681  | 29   | 77602.1   | 18 | 37 | 2 |
| 502.1004 | 0.938259444  | 32   | 55442     | 14 | 38 | 2 |
| 507.5146 | -0.10620383  | 1.5  | 374050    | 67 | 34 | 2 |
| 518.1321 | 1.681234312  | 31   | 77025.92  | 18 | 39 | 2 |
| 520.1471 | 0.425072242  | 30   | 52639.3   | 20 | 39 | 2 |
| 521.5304 | 0.184265419  | 1.5  | 290001.02 | 69 | 35 | 2 |
| 526.1    | 0.135145428  | 34   | 60869.73  | 14 | 40 | 2 |
| 528.1166 | 1.933478278  | 33   | 63252.96  | 16 | 40 | 2 |
| 530.1312 | -0.054514804 | 32   | 70646.9   | 18 | 40 | 2 |

|          |              |      |           |    |    |   |
|----------|--------------|------|-----------|----|----|---|
| 532.1475 | 1.167158964  | 31   | 50981.2   | 20 | 40 | 2 |
| 535.5461 | 0.272805721  | 1.5  | 321750.18 | 71 | 36 | 2 |
| 549.562  | 0.720756321  | 1.5  | 338382.56 | 73 | 37 | 2 |
| 554.132  | 1.391547633  | 34   | 71158.26  | 18 | 42 | 2 |
| 563.5775 | 0.436674827  | 1.5  | 289994.22 | 75 | 38 | 2 |
| 564.1163 | 1.278284144  | 36   | 49738.62  | 16 | 43 | 2 |
| 566.1319 | 1.185414204  | 35   | 76083.3   | 18 | 43 | 2 |
| 576.1167 | 1.945963694  | 37   | 73981.72  | 16 | 44 | 2 |
| 577.5932 | 0.512644802  | 1.5  | 170402.93 | 77 | 39 | 2 |
| 590.1314 | 0.289935512  | 37   | 57637.58  | 18 | 45 | 2 |
| 591.6089 | 0.585015206  | 1.5  | 190141.92 | 79 | 40 | 2 |
| 594.1635 | 1.634401284  | 35   | 46071.5   | 22 | 45 | 2 |
| 602.132  | 1.28061785   | 38   | 74153.56  | 18 | 46 | 2 |
| 604.1478 | 1.524629245  | 37   | 64430.92  | 20 | 46 | 2 |
| 605.0615 | 1.150462888  | 43.5 | 66227.28  | 9  | 47 | 2 |
| 605.6246 | 0.654035947  | 1.5  | 238251.24 | 81 | 41 | 2 |
| 616.1473 | 0.683440936  | 38   | 66796.18  | 20 | 47 | 2 |
| 619.6403 | 0.719934325  | 1.5  | 192396.52 | 83 | 42 | 2 |
| 624.1166 | 1.636075167  | 41   | 68595.17  | 16 | 48 | 2 |
| 630.1632 | 1.064963353  | 38   | 73795.34  | 22 | 48 | 2 |
| 632.1793 | 1.773392435  | 37   | 45896.59  | 24 | 48 | 2 |
| 633.6565 | 1.571989818  | 1.5  | 105934.85 | 85 | 43 | 2 |
| 644.1782 | 0.032754913  | 38   | 50484.92  | 24 | 49 | 2 |
| 647.6712 | 0.071178097  | 1.5  | 119540.39 | 87 | 44 | 2 |
| 648.1165 | 1.421197129  | 43   | 60053.62  | 16 | 50 | 2 |
| 656.1784 | 0.336951162  | 39   | 56141.38  | 24 | 50 | 2 |
| 659.2025 | 1.283522265  | 37.5 | 49314.82  | 27 | 50 | 2 |
| 661.6873 | 0.749750482  | 1.5  | 128173.3  | 89 | 45 | 2 |
| 665.154  | -1.058250052 | 41.5 | 79494.28  | 21 | 51 | 2 |
| 666.1621 | -0.643836874 | 41   | 69559.95  | 22 | 51 | 2 |
| 675.1381 | -1.412894121 | 43.5 | 61167.9   | 19 | 52 | 2 |
| 675.7028 | 0.5122077    | 1.5  | 103748.63 | 91 | 46 | 2 |
| 676.1459 | -1.447762358 | 43   | 87274.29  | 20 | 52 | 2 |
| 681.1866 | 0.87509138   | 40.5 | 56649.98  | 25 | 52 | 2 |
| 684.2093 | -0.261469631 | 39   | 54755.34  | 28 | 52 | 2 |
| 688.1461 | -1.131880452 | 44   | 80288.63  | 20 | 53 | 2 |
| 689.1534 | -1.892028006 | 43.5 | 56763.24  | 21 | 53 | 2 |
| 689.7177 | -0.585601563 | 1.5  | 55542.41  | 93 | 47 | 2 |
| 690.1615 | -1.490808262 | 43   | 69251.81  | 22 | 53 | 2 |
| 692.1787 | 0.752840838  | 42   | 47005.37  | 24 | 53 | 2 |
| 694.1943 | 0.678628908  | 41   | 46388.2   | 26 | 53 | 2 |
| 695.1091 | 1.936534289  | 47.5 | 50140.71  | 15 | 54 | 2 |
| 698.1309 | -0.471114865 | 46   | 82980.56  | 18 | 54 | 2 |
| 702.1619 | -0.89566158  | 44   | 84680.02  | 22 | 54 | 2 |
| 703.1693 | -1.498783323 | 43.5 | 49481.73  | 23 | 54 | 2 |
| 703.7342 | 0.633904509  | 1.5  | 59833.43  | 95 | 48 | 2 |

|          |              |      |          |     |    |   |
|----------|--------------|------|----------|-----|----|---|
| 704.1769 | -1.816159657 | 43   | 69570.5  | 24  | 54 | 2 |
| 706.1945 | 0.95030567   | 42   | 61867.57 | 26  | 54 | 2 |
| 711.1382 | -1.200749692 | 46.5 | 60750.74 | 19  | 55 | 2 |
| 714.163  | 0.659653764  | 45   | 56841.1  | 22  | 55 | 2 |
| 716.1768 | -1.925358857 | 44   | 70949.19 | 24  | 55 | 2 |
| 717.7499 | 0.691188314  | 1.5  | 75422.15 | 97  | 49 | 2 |
| 718.1929 | -1.293383433 | 43   | 64133.12 | 26  | 55 | 2 |
| 724.7115 | 1.684949193  | 5    | 49721.44 | 92  | 50 | 2 |
| 727.1698 | -0.761719722 | 45.5 | 48398.77 | 23  | 56 | 2 |
| 728.1778 | -0.520339679 | 45   | 68222.71 | 24  | 56 | 2 |
| 730.193  | -1.135178041 | 44   | 68044.67 | 26  | 56 | 2 |
| 731.7661 | 1.429557198  | 1.5  | 65571.75 | 99  | 50 | 2 |
| 732.1149 | -0.927312599 | 50   | 49517.39 | 16  | 57 | 2 |
| 732.2095 | 0.02881689   | 43   | 52767.64 | 28  | 56 | 2 |
| 734.1305 | -0.992874259 | 49   | 49774.33 | 18  | 57 | 2 |
| 739.17   | -0.478780024 | 46.5 | 50217.17 | 23  | 57 | 2 |
| 740.1771 | -1.457622003 | 46   | 55376.08 | 24  | 57 | 2 |
| 742.1936 | -0.308410002 | 45   | 65647.77 | 26  | 57 | 2 |
| 745.2166 | -0.944556704 | 43.5 | 63061.59 | 29  | 57 | 2 |
| 750.1618 | -0.971656104 | 48   | 47957.57 | 22  | 58 | 2 |
| 759.1382 | -1.124826862 | 50.5 | 47658.5  | 19  | 59 | 2 |
| 759.7962 | -0.202554275 | 1.5  | 56165.65 | 103 | 52 | 2 |
| 762.1618 | -0.956357696 | 49   | 50626.98 | 22  | 59 | 2 |
| 773.8118 | -0.263500694 | 1.5  | 70874.84 | 105 | 53 | 2 |
| 774.1625 | -0.037330662 | 50   | 54845.81 | 22  | 60 | 2 |
| 776.1771 | -1.390015887 | 49   | 53364.88 | 24  | 60 | 2 |
| 779.201  | -0.839192264 | 47.5 | 64203.36 | 27  | 60 | 2 |
| 784.2414 | 0.791976159  | 45   | 49040.25 | 32  | 60 | 2 |
| 804.1147 | -1.09300208  | 56   | 55340.78 | 16  | 63 | 2 |
| 812.1768 | -1.697780162 | 52   | 49296.64 | 24  | 63 | 2 |
| 813.1846 | -1.726419286 | 51.5 | 58187.84 | 25  | 63 | 2 |
| 814.1954 | 1.929638796  | 51   | 76217.29 | 26  | 63 | 2 |
| 823.1692 | -1.401775458 | 53.5 | 51457.63 | 23  | 64 | 2 |
| 824.1774 | -0.945062633 | 53   | 48705.13 | 24  | 64 | 2 |
| 828.8684 | 1.95580284   | 2    | 53928.34 | 112 | 57 | 2 |
| 844.2423 | 1.80173718   | 50   | 52979.6  | 32  | 65 | 2 |
| 849.5629 | 1.525610378  | 26.5 | 45582.95 | 73  | 62 | 2 |
| 864.2084 | -1.248424168 | 54   | 78885.96 | 28  | 67 | 2 |
| 885.9379 | 0.785721603  | 1.5  | 52637.84 | 121 | 61 | 2 |
| 904.1485 | 1.792960898  | 62   | 67150.25 | 20  | 71 | 2 |
| 914.3185 | -0.578463297 | 50   | 47191.47 | 42  | 70 | 2 |
| 921.1866 | 0.647100583  | 60.5 | 55533.92 | 25  | 72 | 2 |
| 941.9988 | -1.065711475 | 1.5  | 48017.9  | 129 | 65 | 2 |
| 948.2109 | 1.498719462  | 61   | 46231.97 | 28  | 74 | 2 |
| 960.2079 | -1.644328696 | 62   | 60707.51 | 28  | 75 | 2 |
| 978.2557 | -0.74510116  | 60   | 47645.62 | 34  | 76 | 2 |

|          |              |      |          |     |    |   |
|----------|--------------|------|----------|-----|----|---|
| 1060.898 | 0.208408333  | 19   | 56938.83 | 116 | 76 | 2 |
| 1065.282 | 1.592163706  | 65.5 | 53788.39 | 37  | 83 | 2 |
| 1110.256 | -0.116099305 | 71   | 97550.39 | 34  | 87 | 2 |
| 1110.536 | -1.82695213  | 50   | 79565.7  | 70  | 84 | 2 |

b)

| Mass (m/z) | Deviation (ppm) | DBE | Intensity (AU) | H  | C | O |
|------------|-----------------|-----|----------------|----|---|---|
| 87.045     | -1.76805        | 1.5 | 32632.89       | 7  | 4 | 2 |
| 92.9981    | -1.11723        | 5.5 | 2510406.04     | 1  | 5 | 2 |
| 95.0138    | -0.56729        | 4.5 | 49008497.38    | 3  | 5 | 2 |
| 96.0216    | -0.82169        | 4   | 12130.25       | 4  | 5 | 2 |
| 97.0294    | -1.07081        | 3.5 | 4460634.73     | 5  | 5 | 2 |
| 99.0451    | -0.5442         | 2.5 | 150446.18      | 7  | 5 | 2 |
| 101.0607   | -1.02809        | 1.5 | 11398.67       | 9  | 5 | 2 |
| 101.061    | 1.940416        | 1.5 | 8125.29        | 9  | 5 | 2 |
| 106.0061   | 0.670717        | 6   | 675314.98      | 2  | 6 | 2 |
| 107.0139   | 0.430785        | 5.5 | 5655704.61     | 3  | 6 | 2 |
| 108.0217   | 0.195331        | 5   | 120220762.5    | 4  | 6 | 2 |
| 109.0295   | -0.03577        | 4.5 | 66956522.15    | 5  | 6 | 2 |
| 111.0452   | 0.415146        | 3.5 | 1337277.62     | 7  | 6 | 2 |
| 113.0609   | 0.849985        | 2.5 | 78093.24       | 9  | 6 | 2 |
| 115.0766   | 1.269591        | 1.5 | 14617.69       | 11 | 6 | 2 |
| 116.9983   | 0.82138         | 7.5 | 71533.86       | 1  | 7 | 2 |
| 118.0062   | 1.449926        | 7   | 20693.16       | 2  | 7 | 2 |
| 119.0139   | 0.38735         | 6.5 | 24789821.88    | 3  | 7 | 2 |
| 120.0217   | 0.175802        | 6   | 878751.67      | 4  | 7 | 2 |
| 121.0295   | -0.03222        | 5.5 | 252231185.3    | 5  | 7 | 2 |
| 122.0373   | -0.23681        | 5   | 43257141.72    | 6  | 7 | 2 |
| 123.0451   | -0.43805        | 4.5 | 32022317.56    | 7  | 7 | 2 |
| 125.0608   | -0.03118        | 3.5 | 145471.67      | 9  | 7 | 2 |
| 127.0765   | 0.362774        | 2.5 | 58241.47       | 11 | 7 | 2 |
| 129.0921   | -0.03021        | 1.5 | 12137.16       | 13 | 7 | 2 |
| 130.006    | -0.2223         | 8   | 23874.04       | 2  | 8 | 2 |
| 131.0138   | -0.41141        | 7.5 | 2487904.19     | 3  | 8 | 2 |
| 132.0216   | -0.59763        | 7   | 12130109.7     | 4  | 8 | 2 |
| 133.0295   | -0.02932        | 6.5 | 44765706.06    | 5  | 8 | 2 |
| 134.0373   | -0.21561        | 6   | 8182091.54     | 6  | 8 | 2 |
| 135.0452   | 0.341367        | 5.5 | 76581959.15    | 7  | 8 | 2 |
| 136.0529   | -0.57992        | 5   | 6879289.98     | 8  | 8 | 2 |
| 137.0607   | -0.75806        | 4.5 | 4381121.36     | 9  | 8 | 2 |
| 139.0765   | 0.331472        | 3.5 | 13913.28       | 11 | 8 | 2 |
| 141.0921   | -0.02764        | 2.5 | 47854.72       | 13 | 8 | 2 |
| 143.0138   | -0.37689        | 8.5 | 1796093.43     | 3  | 9 | 2 |
| 143.1077   | -0.37664        | 1.5 | 14201.31       | 15 | 8 | 2 |

|          |          |      |             |    |    |   |
|----------|----------|------|-------------|----|----|---|
| 144.0216 | -0.54783 | 8    | 474223.11   | 4  | 9  | 2 |
| 145.0295 | -0.02689 | 7.5  | 114156368.9 | 5  | 9  | 2 |
| 146.0372 | -0.88265 | 7    | 4045198.57  | 6  | 9  | 2 |
| 147.0451 | -0.36655 | 6.5  | 45339388.22 | 7  | 9  | 2 |
| 148.0529 | -0.53292 | 6    | 1314491.57  | 8  | 9  | 2 |
| 149.0607 | -0.69703 | 5.5  | 11187649.3  | 9  | 9  | 2 |
| 150.0686 | -0.19258 | 5    | 244792.55   | 10 | 9  | 2 |
| 151.0764 | -0.35677 | 4.5  | 400249.75   | 11 | 9  | 2 |
| 155.0138 | -0.34771 | 9.5  | 157080.87   | 3  | 10 | 2 |
| 155.1078 | 0.297213 | 2.5  | 31482.26    | 15 | 9  | 2 |
| 156.0216 | -0.5057  | 9    | 1559949.42  | 4  | 10 | 2 |
| 157.0294 | -0.66166 | 8.5  | 8274169.94  | 5  | 10 | 2 |
| 157.1234 | -0.02482 | 1.5  | 9629.3      | 17 | 9  | 2 |
| 158.0372 | -0.81563 | 8    | 23696459.75 | 6  | 10 | 2 |
| 159.0451 | -0.3389  | 7.5  | 77592226.83 | 7  | 10 | 2 |
| 160.0529 | -0.49296 | 7    | 916042.15   | 8  | 10 | 2 |
| 161.0607 | -0.6451  | 6.5  | 9037669.24  | 9  | 10 | 2 |
| 162.0686 | -0.17832 | 6    | 50341.25    | 10 | 10 | 2 |
| 163.0764 | -0.33052 | 5.5  | 1198070.65  | 11 | 10 | 2 |
| 165.0921 | -0.02362 | 4.5  | 24272.68    | 13 | 10 | 2 |
| 167.0138 | -0.32273 | 10.5 | 102325.37   | 3  | 11 | 2 |
| 168.0216 | -0.46958 | 10   | 165697      | 4  | 11 | 2 |
| 169.0294 | -0.61469 | 9.5  | 20645875.57 | 5  | 11 | 2 |
| 169.1234 | -0.02306 | 2.5  | 31011.5     | 17 | 10 | 2 |
| 170.0372 | -0.75807 | 9    | 1768963.56  | 6  | 11 | 2 |
| 171.0451 | -0.31512 | 8.5  | 44238379.03 | 7  | 11 | 2 |
| 171.1391 | 0.269372 | 1.5  | 10114.23    | 19 | 10 | 2 |
| 172.0529 | -0.45858 | 8    | 5900749.93  | 8  | 11 | 2 |
| 173.0607 | -0.60037 | 7.5  | 21358168.03 | 9  | 11 | 2 |
| 174.0685 | -0.74051 | 7    | 73386.81    | 10 | 11 | 2 |
| 175.0763 | -0.87904 | 6.5  | 1964114.89  | 11 | 11 | 2 |
| 177.092  | -0.5867  | 5.5  | 180989.33   | 13 | 11 | 2 |
| 180.0216 | -0.43828 | 11   | 150736.05   | 4  | 12 | 2 |
| 181.0294 | -0.57394 | 10.5 | 2849268.18  | 5  | 12 | 2 |
| 182.0373 | -0.15876 | 10   | 14336632.62 | 6  | 12 | 2 |
| 183.045  | -0.84078 | 9.5  | 26254119.26 | 7  | 12 | 2 |
| 183.1389 | -0.84035 | 2.5  | 24588.34    | 19 | 11 | 2 |
| 184.0528 | -0.972   | 9    | 3081070.06  | 8  | 12 | 2 |
| 185.0607 | -0.56144 | 8.5  | 22518910.69 | 9  | 12 | 2 |
| 186.0685 | -0.69276 | 8    | 601306.81   | 10 | 12 | 2 |
| 187.0763 | -0.82266 | 7.5  | 4011019.01  | 11 | 12 | 2 |
| 188.9985 | 1.566682 | 13.5 | 48900.04    | 1  | 13 | 2 |
| 189.092  | -0.54947 | 6.5  | 326063.41   | 13 | 12 | 2 |
| 191.1078 | 0.241225 | 5.5  | 24362.51    | 15 | 12 | 2 |
| 192.0218 | 0.630658 | 12   | 20411.09    | 4  | 13 | 2 |
| 193.0293 | -1.05632 | 11.5 | 4327688.56  | 5  | 13 | 2 |



|          |          |      |             |    |    |   |
|----------|----------|------|-------------|----|----|---|
| 194.0372 | -0.66431 | 11   | 575715.45   | 6  | 13 | 2 |
| 195.0451 | -0.27635 | 10.5 | 49550039.74 | 7  | 13 | 2 |
| 196.0528 | -0.91251 | 10   | 5788051.92  | 8  | 13 | 2 |
| 197.0607 | -0.52725 | 9.5  | 24802793.38 | 9  | 13 | 2 |
| 197.1547 | -0.01978 | 2.5  | 19968.97    | 21 | 12 | 2 |
| 198.0685 | -0.65078 | 9    | 1194307.31  | 10 | 13 | 2 |
| 199.0763 | -0.77307 | 8.5  | 6722982.27  | 11 | 13 | 2 |
| 199.1703 | -0.27062 | 1.5  | 65472.89    | 23 | 12 | 2 |
| 200.0842 | -0.39433 | 8    | 23589.9     | 12 | 13 | 2 |
| 200.9985 | 1.473147 | 14.5 | 41356.27    | 1  | 14 | 2 |
| 201.092  | -0.51668 | 7.5  | 636427.46   | 13 | 13 | 2 |
| 203.0141 | 1.212233 | 13.5 | 11916.62    | 3  | 14 | 2 |
| 203.1077 | -0.26538 | 6.5  | 37918.91    | 15 | 13 | 2 |
| 204.0215 | -0.87687 | 13   | 6269.89     | 4  | 14 | 2 |
| 205.0294 | -0.50676 | 12.5 | 316742.36   | 5  | 14 | 2 |
| 205.1233 | -0.50652 | 5.5  | 7179.14     | 17 | 13 | 2 |
| 206.0372 | -0.62561 | 12   | 1979681.34  | 6  | 14 | 2 |
| 207.045  | -0.74332 | 11.5 | 7317074.77  | 7  | 14 | 2 |
| 208.0528 | -0.85988 | 11   | 10209412.19 | 8  | 14 | 2 |
| 209.0608 | -0.01865 | 10.5 | 37916630.53 | 9  | 14 | 2 |
| 210.0685 | -0.61361 | 10   | 1918871.28  | 10 | 14 | 2 |
| 211.0763 | -0.72912 | 9.5  | 11287152.92 | 11 | 14 | 2 |
| 211.1704 | 0.218307 | 2.5  | 19042.96    | 23 | 13 | 2 |
| 212.0842 | -0.37202 | 9    | 324750.9    | 12 | 14 | 2 |
| 212.9985 | 1.390153 | 15.5 | 140452.96   | 1  | 15 | 2 |
| 213.092  | -0.48758 | 8.5  | 2027252.72  | 13 | 14 | 2 |
| 213.186  | -0.01829 | 1.5  | 18655.4     | 25 | 13 | 2 |
| 214.0063 | 1.266787 | 15   | 27146.14    | 2  | 15 | 2 |
| 215.0141 | 1.144577 | 14.5 | 15668.3     | 3  | 15 | 2 |
| 215.1077 | -0.25057 | 7.5  | 80077.25    | 15 | 14 | 2 |
| 217.0294 | -0.47874 | 13.5 | 376867.64   | 5  | 15 | 2 |
| 217.1233 | -0.47853 | 6.5  | 6636.58     | 17 | 14 | 2 |
| 218.0371 | -1.04982 | 13   | 117694.22   | 6  | 15 | 2 |
| 219.045  | -0.70259 | 12.5 | 10626841.42 | 7  | 15 | 2 |
| 219.1391 | 0.210369 | 5.5  | 6321.13     | 19 | 14 | 2 |
| 220.0528 | -0.81299 | 12   | 2070468.12  | 8  | 15 | 2 |
| 221.0607 | -0.47001 | 11.5 | 15813691.29 | 9  | 15 | 2 |
| 222.0685 | -0.58045 | 11   | 4427309.4   | 10 | 15 | 2 |
| 223.0764 | -0.24162 | 10.5 | 13743211.18 | 11 | 15 | 2 |
| 224.0842 | -0.3521  | 10   | 346952.05   | 12 | 15 | 2 |
| 224.9985 | 1.316011 | 16.5 | 245240.34   | 1  | 16 | 2 |
| 225.092  | -0.46159 | 9.5  | 3443446.1   | 13 | 15 | 2 |
| 225.186  | -0.01732 | 2.5  | 25874.01    | 25 | 14 | 2 |
| 226.0999 | -0.12782 | 9    | 44019.08    | 14 | 15 | 2 |
| 227.0141 | 1.084075 | 15.5 | 26856.84    | 3  | 16 | 2 |
| 227.1077 | -0.23733 | 8.5  | 549726.93   | 15 | 15 | 2 |

|          |          |      |             |    |    |   |
|----------|----------|------|-------------|----|----|---|
| 227.2017 | 0.202903 | 1.5  | 81030.38    | 27 | 14 | 2 |
| 229.0296 | 0.419597 | 14.5 | 36405.05    | 5  | 16 | 2 |
| 229.1234 | -0.01702 | 7.5  | 9596.46     | 17 | 15 | 2 |
| 230.0373 | -0.12563 | 14   | 179071.39   | 6  | 16 | 2 |
| 231.0451 | -0.23329 | 13.5 | 1396611.69  | 7  | 16 | 2 |
| 232.0529 | -0.34001 | 13   | 6949066.55  | 8  | 16 | 2 |
| 233.0607 | -0.44581 | 12.5 | 11787259.72 | 9  | 16 | 2 |
| 234.0686 | -0.12347 | 12   | 1936728.04  | 10 | 16 | 2 |
| 235.0764 | -0.22929 | 11.5 | 11007783.05 | 11 | 16 | 2 |
| 236.0842 | -0.3342  | 11   | 704971.95   | 12 | 16 | 2 |
| 236.9985 | 1.249377 | 17.5 | 156344.72   | 1  | 17 | 2 |
| 237.0921 | -0.01645 | 10.5 | 3684971.5   | 13 | 16 | 2 |
| 238.0999 | -0.12138 | 10   | 30877.27    | 14 | 16 | 2 |
| 239.0143 | 1.866419 | 16.5 | 51656.92    | 3  | 17 | 2 |
| 239.1078 | 0.1928   | 9.5  | 845141.3    | 15 | 16 | 2 |
| 239.2016 | -0.22533 | 2.5  | 16020.28    | 27 | 15 | 2 |
| 240.1157 | 0.50434  | 9    | 12280.82    | 16 | 16 | 2 |
| 241.0298 | 1.22848  | 15.5 | 35873.76    | 5  | 17 | 2 |
| 241.1235 | 0.398551 | 8.5  | 76501.86    | 17 | 16 | 2 |
| 241.2174 | 0.398396 | 1.5  | 44780.96    | 29 | 15 | 2 |
| 242.0369 | -1.77204 | 15   | 24900.97    | 6  | 17 | 2 |
| 243.0451 | -0.22177 | 14.5 | 2102534.18  | 7  | 17 | 2 |
| 243.1392 | 0.600891 | 7.5  | 8987.04     | 19 | 16 | 2 |
| 244.0529 | -0.32329 | 14   | 494283.4    | 8  | 17 | 2 |
| 245.0608 | -0.01591 | 13.5 | 11147638.04 | 9  | 17 | 2 |
| 246.0686 | -0.11745 | 13   | 3653689.78  | 10 | 17 | 2 |
| 247.0764 | -0.21815 | 12.5 | 8174385.12  | 11 | 17 | 2 |
| 248.0843 | 0.085052 | 12   | 662778.62   | 12 | 17 | 2 |
| 248.9986 | 1.590775 | 18.5 | 2431429.2   | 1  | 18 | 2 |
| 249.0921 | -0.01566 | 11.5 | 4257498.35  | 13 | 17 | 2 |
| 250.1    | 0.284286 | 11   | 41693.26    | 14 | 17 | 2 |
| 251.0143 | 1.777193 | 17.5 | 79128.72    | 3  | 18 | 2 |
| 251.1078 | 0.183587 | 10.5 | 856869.36   | 15 | 17 | 2 |
| 253.03   | 1.960641 | 16.5 | 20407.25    | 5  | 18 | 2 |
| 253.1235 | 0.379657 | 9.5  | 128597.26   | 17 | 17 | 2 |
| 253.2175 | 0.774434 | 2.5  | 137916.96   | 29 | 16 | 2 |
| 254.0374 | 0.27988  | 16   | 26772.09    | 6  | 18 | 2 |
| 255.0453 | 0.57284  | 15.5 | 176412.36   | 7  | 18 | 2 |
| 255.1392 | 0.572629 | 8.5  | 8928.1      | 19 | 17 | 2 |
| 255.2333 | 1.356016 | 1.5  | 14970289.85 | 31 | 16 | 2 |
| 256.0531 | 0.472949 | 15   | 1896887.14  | 8  | 18 | 2 |
| 257.0609 | 0.373842 | 14.5 | 3569888.69  | 9  | 18 | 2 |
| 258.0686 | -0.11199 | 14   | 3012741.24  | 10 | 18 | 2 |
| 259.0765 | 0.17794  | 13.5 | 11210041.19 | 11 | 18 | 2 |
| 260.0843 | 0.081128 | 13   | 883593.16   | 12 | 18 | 2 |
| 261.0921 | -0.01494 | 12.5 | 3923854.55  | 13 | 18 | 2 |

|          |          |      |             |    |    |   |
|----------|----------|------|-------------|----|----|---|
| 262.1001 | 0.652804 | 12   | 71385.25    | 14 | 18 | 2 |
| 263.0143 | 1.696108 | 18.5 | 396429.49   | 3  | 19 | 2 |
| 263.1078 | 0.175213 | 11.5 | 1130472.19  | 15 | 18 | 2 |
| 265.03   | 1.871867 | 17.5 | 48377.66    | 5  | 19 | 2 |
| 265.1236 | 0.739656 | 10.5 | 140471.84   | 17 | 18 | 2 |
| 266.0373 | -0.10863 | 17   | 11182.84    | 6  | 19 | 2 |
| 267.0454 | 0.921567 | 16.5 | 273838.66   | 7  | 19 | 2 |
| 267.1392 | 0.546906 | 9.5  | 21775.32    | 19 | 18 | 2 |
| 267.2332 | 0.920919 | 2.5  | 15715.72    | 31 | 17 | 2 |
| 268.0531 | 0.451776 | 16   | 99053.7     | 8  | 19 | 2 |
| 269.0609 | 0.357168 | 15.5 | 4659488.77  | 9  | 19 | 2 |
| 269.2489 | 1.099727 | 1.5  | 59864.39    | 33 | 17 | 2 |
| 270.0688 | 0.633543 | 15   | 1385371.11  | 10 | 19 | 2 |
| 271.0766 | 0.538962 | 14.5 | 4991019.39  | 11 | 19 | 2 |
| 272.0845 | 0.812616 | 14   | 1662027.92  | 12 | 19 | 2 |
| 273.0923 | 0.718073 | 13.5 | 5351710.97  | 13 | 19 | 2 |
| 274.1001 | 0.624225 | 13   | 131000.15   | 14 | 19 | 2 |
| 275.108  | 0.894559 | 12.5 | 1256905.35  | 15 | 19 | 2 |
| 276.1157 | 0.438584 | 12   | 11467.6     | 16 | 19 | 2 |
| 277.0299 | 1.429812 | 18.5 | 99159.93    | 5  | 20 | 2 |
| 277.1235 | 0.346777 | 11.5 | 221947.93   | 17 | 19 | 2 |
| 278.0374 | 0.255721 | 18   | 7321.45     | 6  | 20 | 2 |
| 279.0453 | 0.523571 | 17.5 | 59181.17    | 7  | 20 | 2 |
| 279.1389 | -0.55134 | 10.5 | 13571.49    | 19 | 19 | 2 |
| 279.2332 | 0.881343 | 3.5  | 21760.78    | 31 | 18 | 2 |
| 280.053  | 0.075343 | 17   | 268648.35   | 8  | 20 | 2 |
| 281.0609 | 0.341919 | 16.5 | 761454.89   | 9  | 20 | 2 |
| 281.2488 | 0.697248 | 2.5  | 392415.55   | 33 | 18 | 2 |
| 282.0687 | 0.252066 | 16   | 2328321.5   | 10 | 20 | 2 |
| 283.0765 | 0.162854 | 15.5 | 4554968.19  | 11 | 20 | 2 |
| 283.2646 | 1.221827 | 1.5  | 17489172.75 | 35 | 18 | 2 |
| 284.0843 | 0.074274 | 15   | 729186.35   | 12 | 20 | 2 |
| 285.0922 | 0.337084 | 14.5 | 3392643.77  | 13 | 20 | 2 |
| 286.0065 | 1.647168 | 21   | 26543.92    | 2  | 21 | 2 |
| 286.1    | 0.248515 | 14   | 268389.05   | 14 | 20 | 2 |
| 287.0144 | 1.902696 | 20.5 | 72116.08    | 3  | 21 | 2 |
| 287.1079 | 0.508868 | 13.5 | 1444429.7   | 15 | 20 | 2 |
| 288.1158 | 0.7674   | 13   | 11602.78    | 16 | 20 | 2 |
| 289.1236 | 0.678257 | 12.5 | 261659.2    | 17 | 20 | 2 |
| 291.0455 | 1.189163 | 18.5 | 77684.68    | 7  | 21 | 2 |
| 291.1393 | 0.845301 | 11.5 | 25514.6     | 19 | 20 | 2 |
| 292.0528 | -0.61256 | 18   | 20966.62    | 8  | 21 | 2 |
| 293.061  | 0.669144 | 17.5 | 1267911.87  | 9  | 21 | 2 |
| 294.0688 | 0.581837 | 17   | 381047.67   | 10 | 21 | 2 |
| 295.0764 | -0.18266 | 16.5 | 2906295.74  | 11 | 21 | 2 |
| 295.2644 | 0.494811 | 2.5  | 6470.21     | 35 | 19 | 2 |

|          |          |      |            |    |    |   |
|----------|----------|------|------------|----|----|---|
| 296.0842 | -0.26648 | 16   | 1473565.64 | 12 | 21 | 2 |
| 297.092  | -0.34972 | 15.5 | 2599834.63 | 13 | 21 | 2 |
| 297.2798 | -0.3495  | 1.5  | 18174.55   | 37 | 19 | 2 |
| 298.0999 | -0.09695 | 15   | 185363.47  | 14 | 21 | 2 |
| 299.0142 | 1.157471 | 21.5 | 248396.96  | 3  | 22 | 2 |
| 299.1077 | -0.1802  | 14.5 | 1300994.26 | 15 | 21 | 2 |
| 300.1157 | 0.403511 | 14   | 23822.73   | 16 | 21 | 2 |
| 301.0298 | 0.983625 | 20.5 | 68930.86   | 5  | 22 | 2 |
| 301.1234 | -0.01295 | 13.5 | 145014.63  | 17 | 21 | 2 |
| 302.0378 | 1.559741 | 20   | 6877.83    | 6  | 22 | 2 |
| 303.0455 | 1.142074 | 19.5 | 26266.01   | 7  | 22 | 2 |
| 303.1391 | 0.152075 | 12.5 | 40091.46   | 19 | 21 | 2 |
| 304.0531 | 0.398286 | 19   | 38696.83   | 8  | 22 | 2 |
| 305.0609 | 0.315019 | 18.5 | 150574.59  | 9  | 22 | 2 |
| 306.0687 | 0.232301 | 18   | 950890.19  | 10 | 22 | 2 |
| 307.0765 | 0.150125 | 17.5 | 1521620.13 | 11 | 22 | 2 |
| 308.0844 | 0.393074 | 17   | 628065.16  | 12 | 22 | 2 |
| 309.0922 | 0.310911 | 16.5 | 2486017.03 | 13 | 22 | 2 |
| 310.1001 | 0.551758 | 16   | 318412.41  | 14 | 22 | 2 |
| 311.1079 | 0.469612 | 15.5 | 1050477.64 | 15 | 22 | 2 |
| 311.2959 | 1.111805 | 1.5  | 29696.6    | 39 | 20 | 2 |
| 312.1157 | 0.387997 | 15   | 20994.44   | 16 | 22 | 2 |
| 313.0301 | 1.904293 | 21.5 | 138871.09  | 5  | 23 | 2 |
| 313.1236 | 0.626271 | 14.5 | 296210.58  | 17 | 22 | 2 |
| 315.0457 | 1.733402 | 20.5 | 45095.05   | 7  | 23 | 2 |
| 315.1394 | 1.098245 | 13.5 | 38281.87   | 19 | 22 | 2 |
| 316.0534 | 1.332372 | 20   | 17517.63   | 8  | 23 | 2 |
| 317.0607 | -0.3277  | 19.5 | 214814.65  | 9  | 23 | 2 |
| 318.0685 | -0.40526 | 19   | 73409.79   | 10 | 23 | 2 |
| 319.0763 | -0.48233 | 18.5 | 1360523.58 | 11 | 23 | 2 |
| 320.0842 | -0.2465  | 18   | 564754.84  | 12 | 23 | 2 |
| 321.092  | -0.32358 | 17.5 | 1226269.12 | 13 | 23 | 2 |
| 322.0999 | -0.08972 | 17   | 266446.6   | 14 | 23 | 2 |
| 323.1077 | -0.16682 | 16.5 | 1154236.24 | 15 | 23 | 2 |
| 324.1155 | -0.24343 | 16   | 21577.94   | 16 | 23 | 2 |
| 325.0299 | 1.218659 | 22.5 | 97476.77   | 5  | 24 | 2 |
| 325.1235 | 0.29558  | 15.5 | 236047.08  | 17 | 23 | 2 |
| 327.0455 | 1.058264 | 21.5 | 46582.47   | 7  | 24 | 2 |
| 327.1391 | 0.140919 | 14.5 | 34855.46   | 19 | 23 | 2 |
| 328.0533 | 0.978805 | 21   | 14119.97   | 8  | 24 | 2 |
| 329.0609 | 0.292043 | 20.5 | 30280.62   | 9  | 24 | 2 |
| 330.0687 | 0.21541  | 20   | 197858.59  | 10 | 24 | 2 |
| 331.0765 | 0.139243 | 19.5 | 331405.1   | 11 | 24 | 2 |
| 332.0843 | 0.063538 | 19   | 432145.83  | 12 | 24 | 2 |
| 333.0921 | -0.01171 | 18.5 | 1241361.03 | 13 | 24 | 2 |
| 334.1    | 0.212811 | 18   | 168764.26  | 14 | 24 | 2 |

|          |          |      |           |    |    |   |
|----------|----------|------|-----------|----|----|---|
| 335.1079 | 0.435979 | 17.5 | 691055.72 | 15 | 24 | 2 |
| 336.1158 | 0.657809 | 17   | 36622.66  | 16 | 24 | 2 |
| 337.1236 | 0.581686 | 16.5 | 221767.69 | 17 | 24 | 2 |
| 339.0455 | 1.020808 | 22.5 | 60750.65  | 7  | 25 | 2 |
| 339.139  | -0.15893 | 15.5 | 38203.15  | 19 | 24 | 2 |
| 340.0535 | 1.532408 | 22   | 6537.05   | 8  | 25 | 2 |
| 341.0609 | 0.281768 | 21.5 | 63540.65  | 9  | 25 | 2 |
| 342.0685 | -0.37682 | 21   | 28117.36  | 10 | 25 | 2 |
| 343.0764 | -0.15711 | 20.5 | 475315.49 | 11 | 25 | 2 |
| 344.0843 | 0.061322 | 20   | 167060.55 | 12 | 25 | 2 |
| 345.0921 | -0.0113  | 19.5 | 615015.93 | 13 | 25 | 2 |
| 346.0999 | -0.0835  | 19   | 256687.33 | 14 | 25 | 2 |
| 347.1078 | 0.132812 | 18.5 | 616183    | 15 | 25 | 2 |
| 348.1159 | 0.922395 | 18   | 33900.87  | 16 | 25 | 2 |
| 349.1235 | 0.275261 | 17.5 | 189718.21 | 17 | 25 | 2 |
| 351.0458 | 1.840504 | 23.5 | 25801.66  | 7  | 26 | 2 |
| 351.1392 | 0.416074 | 16.5 | 35387.31  | 19 | 25 | 2 |
| 353.0611 | 0.838666 | 22.5 | 26102.84  | 9  | 26 | 2 |
| 353.1547 | -0.01104 | 15.5 | 6038.1    | 21 | 25 | 2 |
| 354.0688 | 0.48324  | 22   | 58678.11  | 10 | 26 | 2 |
| 355.0766 | 0.411461 | 21.5 | 94076.74  | 11 | 26 | 2 |
| 355.1705 | 0.411352 | 14.5 | 5983.27   | 23 | 25 | 2 |
| 356.0844 | 0.340088 | 21   | 230552.81 | 12 | 26 | 2 |
| 357.0922 | 0.269118 | 20.5 | 493303.4  | 13 | 26 | 2 |
| 358.1    | 0.198548 | 20   | 113401.71 | 14 | 26 | 2 |
| 359.1079 | 0.406842 | 19.5 | 424582.8  | 15 | 26 | 2 |
| 360.1157 | 0.336281 | 19   | 52408.39  | 16 | 26 | 2 |
| 361.1236 | 0.543028 | 18.5 | 150588.62 | 17 | 26 | 2 |
| 363.1393 | 0.677702 | 17.5 | 28467.87  | 19 | 26 | 2 |
| 365.0611 | 0.811098 | 23.5 | 25151.87  | 9  | 27 | 2 |
| 365.1551 | 1.084746 | 16.5 | 6775.92   | 21 | 26 | 2 |
| 366.0693 | 1.833263 | 23   | 9817.83   | 10 | 27 | 2 |
| 367.0765 | 0.125587 | 22.5 | 138272.51 | 11 | 27 | 2 |
| 368.0844 | 0.329001 | 22   | 45524.88  | 12 | 27 | 2 |
| 369.0921 | -0.01057 | 21.5 | 307562.38 | 13 | 27 | 2 |
| 370.0999 | -0.07809 | 21   | 150865.76 | 14 | 27 | 2 |
| 371.1078 | 0.124223 | 20.5 | 250871.15 | 15 | 27 | 2 |
| 372.1157 | 0.325437 | 20   | 33608.99  | 16 | 27 | 2 |
| 373.1235 | 0.257556 | 19.5 | 125919.84 | 17 | 27 | 2 |
| 375.1391 | 0.122888 | 18.5 | 32609.15  | 19 | 27 | 2 |
| 376.0536 | 1.651629 | 25   | 9223.65   | 8  | 28 | 2 |
| 377.1547 | -0.01034 | 17.5 | 7719.24   | 21 | 27 | 2 |
| 378.0691 | 1.24607  | 24   | 24221.94  | 10 | 28 | 2 |
| 379.0768 | 0.913008 | 23.5 | 23852.87  | 11 | 28 | 2 |
| 380.0846 | 0.844813 | 23   | 85827.74  | 12 | 28 | 2 |
| 381.0922 | 0.25217  | 22.5 | 134110.51 | 13 | 28 | 2 |

|          |          |      |           |    |    |   |
|----------|----------|------|-----------|----|----|---|
| 382.1002 | 0.7095   | 22   | 75169.62  | 14 | 28 | 2 |
| 383.1079 | 0.381355 | 21.5 | 216212.65 | 15 | 28 | 2 |
| 384.1157 | 0.31527  | 21   | 37682.73  | 16 | 28 | 2 |
| 385.1237 | 0.768844 | 20.5 | 74988.58  | 17 | 28 | 2 |
| 386.1312 | -0.07485 | 20   | 6129.21   | 18 | 28 | 2 |
| 387.1393 | 0.635689 | 19.5 | 25825.89  | 19 | 28 | 2 |
| 389.0613 | 1.275122 | 25.5 | 20003.62  | 9  | 29 | 2 |
| 391.0768 | 0.884993 | 24.5 | 43154.76  | 11 | 29 | 2 |
| 392.0849 | 1.584098 | 24   | 23648.01  | 12 | 29 | 2 |
| 392.9989 | 1.771255 | 30.5 | 6989.24   | 1  | 30 | 2 |
| 393.0924 | 0.753259 | 23.5 | 120684.37 | 13 | 29 | 2 |
| 394.1001 | 0.434154 | 23   | 59161.15  | 14 | 29 | 2 |
| 395.1078 | 0.116677 | 22.5 | 107121.07 | 15 | 29 | 2 |
| 396.1157 | 0.305719 | 22   | 30011     | 16 | 29 | 2 |
| 397.1235 | 0.24199  | 21.5 | 74052.74  | 17 | 29 | 2 |
| 399.1391 | 0.115499 | 20.5 | 17255.75  | 19 | 29 | 2 |
| 403.0767 | 0.610554 | 25.5 | 19305.73  | 11 | 30 | 2 |
| 404.0848 | 1.289582 | 25   | 28274.86  | 12 | 30 | 2 |
| 405.0924 | 0.730945 | 24.5 | 38206.46  | 13 | 30 | 2 |
| 406.1003 | 0.913814 | 24   | 65094.2   | 14 | 30 | 2 |
| 407.1079 | 0.358873 | 23.5 | 85202.13  | 15 | 30 | 2 |
| 408.116  | 1.031816 | 23   | 28409.62  | 16 | 30 | 2 |
| 409.1235 | 0.234892 | 22.5 | 44096.6   | 17 | 30 | 2 |
| 410.131  | -0.55811 | 22   | 9462.91   | 18 | 30 | 2 |
| 411.1393 | 0.598581 | 21.5 | 20547.47  | 19 | 30 | 2 |
| 412.0536 | 1.50733  | 28   | 5817.52   | 8  | 31 | 2 |
| 413.1551 | 0.958721 | 20.5 | 6933.02   | 21 | 30 | 2 |
| 415.077  | 1.315661 | 26.5 | 24020.68  | 11 | 31 | 2 |
| 416.0844 | 0.291047 | 26   | 13538.58  | 12 | 31 | 2 |
| 417.0924 | 0.709915 | 25.5 | 56594.9   | 13 | 31 | 2 |
| 419.108  | 0.5872   | 24.5 | 62135.78  | 15 | 31 | 2 |
| 420.1162 | 1.478403 | 24   | 33215.02  | 16 | 31 | 2 |
| 421.1238 | 0.940579 | 23.5 | 32196.27  | 17 | 31 | 2 |
| 422.1319 | 1.58979  | 23   | 8484.87   | 18 | 31 | 2 |
| 423.1393 | 0.581605 | 22.5 | 16912.36  | 19 | 31 | 2 |
| 427.0772 | 1.746994 | 27.5 | 17924.5   | 11 | 32 | 2 |
| 428.0843 | 0.049289 | 27   | 20325.16  | 12 | 32 | 2 |
| 429.0924 | 0.690062 | 26.5 | 24798.53  | 13 | 32 | 2 |
| 430.1004 | 1.095327 | 26   | 28203.43  | 14 | 32 | 2 |
| 431.1077 | -0.12503 | 25.5 | 43857.5   | 15 | 32 | 2 |
| 432.1161 | 1.205927 | 25   | 22955.82  | 16 | 32 | 2 |
| 433.1237 | 0.683639 | 24.5 | 34002.76  | 17 | 32 | 2 |
| 434.1317 | 1.085156 | 24   | 7441.36   | 18 | 32 | 2 |
| 435.1386 | -1.04311 | 23.5 | 15138.02  | 19 | 32 | 2 |
| 436.0537 | 1.653698 | 30   | 6879.57   | 8  | 33 | 2 |
| 437.1553 | 1.36359  | 22.5 | 6906.11   | 21 | 32 | 2 |

|          |          |      |          |    |    |   |
|----------|----------|------|----------|----|----|---|
| 441.0928 | 1.578128 | 27.5 | 41175.94 | 13 | 33 | 2 |
| 442.1004 | 1.065596 | 27   | 17435.93 | 14 | 33 | 2 |
| 443.1074 | -0.79868 | 26.5 | 42317.62 | 15 | 33 | 2 |
| 444.1163 | 1.623676 | 26   | 26291.48 | 16 | 33 | 2 |
| 445.1235 | 0.215895 | 25.5 | 26311.45 | 17 | 33 | 2 |
| 446.132  | 1.728415 | 25   | 8147.39  | 18 | 33 | 2 |
| 447.1388 | -0.56783 | 24.5 | 10065.93 | 19 | 33 | 2 |
| 454.1007 | 1.698084 | 28   | 21468.72 | 14 | 34 | 2 |
| 457.1239 | 1.085265 | 26.5 | 27919.32 | 17 | 34 | 2 |
| 459.1394 | 0.753802 | 25.5 | 13270.7  | 19 | 34 | 2 |
| 466.1008 | 1.868913 | 29   | 11721.4  | 14 | 35 | 2 |
| 468.1165 | 1.967676 | 28   | 22916.73 | 16 | 35 | 2 |
| 469.1238 | 0.844341 | 27.5 | 24721.86 | 17 | 35 | 2 |
| 470.1315 | 0.576648 | 27   | 11165.4  | 18 | 35 | 2 |
| 471.1397 | 1.371357 | 26.5 | 9657.76  | 19 | 35 | 2 |
| 473.1552 | 1.048494 | 25.5 | 5776.8   | 21 | 35 | 2 |
| 480.1163 | 1.50193  | 29   | 18352.92 | 16 | 36 | 2 |
| 482.132  | 1.599357 | 28   | 13010.22 | 18 | 36 | 2 |
| 483.1397 | 1.337296 | 27.5 | 11533.48 | 19 | 36 | 2 |
| 485.1541 | -1.24476 | 26.5 | 10602.79 | 21 | 36 | 2 |
| 490.1005 | 1.165273 | 31   | 6011.26  | 14 | 37 | 2 |
| 491.1086 | 1.72284  | 30.5 | 33391.99 | 15 | 37 | 2 |
| 492.1162 | 1.262102 | 30   | 7636.52  | 16 | 37 | 2 |
| 495.1396 | 1.102922 | 28.5 | 9400.03  | 19 | 37 | 2 |
| 497.154  | -1.41586 | 27.5 | 6996.11  | 21 | 37 | 2 |
| 506.1315 | 0.535632 | 30   | 12836.12 | 18 | 38 | 2 |
| 509.0616 | 1.56386  | 35.5 | 5762.2   | 9  | 39 | 2 |
| 512.0852 | 1.798727 | 34   | 5919.4   | 12 | 39 | 2 |
| 519.139  | -0.10383 | 30.5 | 22516.3  | 19 | 39 | 2 |
| 526.1001 | 0.325223 | 34   | 12470.83 | 14 | 40 | 2 |
| 528.1163 | 1.365421 | 33   | 11926.15 | 16 | 40 | 2 |
| 531.1395 | 0.839893 | 31.5 | 18465.45 | 19 | 40 | 2 |
| 536.085  | 1.345124 | 36   | 6987.35  | 12 | 41 | 2 |
| 538.101  | 1.990522 | 35   | 6377.42  | 14 | 41 | 2 |
| 556.1473 | 0.757174 | 33   | 9536.26  | 20 | 42 | 2 |
| 564.1153 | -0.4944  | 36   | 10620.19 | 16 | 43 | 2 |
| 566.1319 | 1.185414 | 35   | 7494.61  | 18 | 43 | 2 |
| 569.1557 | 1.750139 | 33.5 | 9730.4   | 21 | 43 | 2 |
| 572.0838 | -0.83711 | 39   | 8037.04  | 12 | 44 | 2 |
| 582.0694 | 1.324758 | 41   | 6111.26  | 10 | 45 | 2 |
| 586.1011 | 1.998123 | 39   | 7901.07  | 14 | 45 | 2 |
| 589.1238 | 0.672355 | 37.5 | 14347.41 | 17 | 45 | 2 |
| 591.1393 | 0.416315 | 36.5 | 15094.61 | 19 | 45 | 2 |
| 600.1159 | 0.535064 | 39   | 9230.81  | 16 | 46 | 2 |
| 606.1626 | 0.117295 | 36   | 9901.37  | 22 | 46 | 2 |
| 614.1302 | -1.67537 | 39   | 11384.74 | 18 | 47 | 2 |

|          |          |      |          |    |    |   |
|----------|----------|------|----------|----|----|---|
| 624.1152 | -0.6071  | 41   | 12996.99 | 16 | 48 | 2 |
| 628.1472 | 0.511186 | 39   | 9881.82  | 20 | 48 | 2 |
| 638.1315 | 0.424834 | 41   | 10566.55 | 18 | 49 | 2 |
| 648.1143 | -1.97326 | 43   | 8873.36  | 16 | 50 | 2 |
| 650.132  | 1.186068 | 42   | 8885.27  | 18 | 50 | 2 |
| 652.1474 | 0.799053 | 41   | 8068.4   | 20 | 50 | 2 |
| 654.1633 | 1.178759 | 40   | 7201.51  | 22 | 50 | 2 |
| 660.1161 | 0.789407 | 44   | 14544.18 | 16 | 51 | 2 |
| 664.1463 | -0.87164 | 42   | 13138.97 | 20 | 51 | 2 |
| 666.1624 | -0.1935  | 41   | 8310.93  | 22 | 51 | 2 |
| 676.1456 | -1.89145 | 43   | 11329.65 | 20 | 52 | 2 |
| 688.1472 | 0.466615 | 44   | 7751.35  | 20 | 53 | 2 |
| 698.1308 | -0.61435 | 46   | 6086     | 18 | 54 | 2 |
| 701.1557 | 1.420657 | 44.5 | 6861.29  | 21 | 54 | 2 |
| 702.1637 | 1.667847 | 44   | 7910.27  | 22 | 54 | 2 |
| 712.1482 | 1.855095 | 46   | 6414.92  | 20 | 55 | 2 |
| 724.1468 | -0.10896 | 47   | 8048.51  | 20 | 56 | 2 |
| 728.178  | -0.24568 | 45   | 8582.44  | 24 | 56 | 2 |
| 730.1938 | -0.03958 | 44   | 6572.63  | 26 | 56 | 2 |
| 738.1617 | -1.12292 | 47   | 7958.88  | 22 | 57 | 2 |
| 740.1769 | -1.72783 | 46   | 9127.52  | 24 | 57 | 2 |
| 742.1929 | -1.25156 | 45   | 7282.56  | 26 | 57 | 2 |
| 750.1613 | -1.63818 | 48   | 8023.76  | 22 | 58 | 2 |
| 754.1952 | 1.817968 | 46   | 6902.09  | 26 | 58 | 2 |
| 762.164  | 1.930166 | 49   | 10972.5  | 22 | 59 | 2 |
| 800.1788 | 0.776202 | 51   | 8680.43  | 24 | 62 | 2 |
| 804.2104 | 1.145348 | 49   | 7788.46  | 28 | 62 | 2 |
| 810.1619 | -0.77626 | 53   | 8727.41  | 22 | 63 | 2 |
| 824.1779 | -0.3384  | 53   | 7563.64  | 24 | 64 | 2 |
| 914.2243 | -0.90667 | 57   | 5690.78  | 30 | 71 | 2 |
| 924.2092 | -0.30177 | 59   | 6627.59  | 28 | 72 | 2 |
| 938.2241 | -1.09665 | 59   | 6559.14  | 30 | 73 | 2 |
| 963.2332 | 0.255494 | 60.5 | 8650.98  | 31 | 75 | 2 |
| 1045.31  | -1.63004 | 61.5 | 5910.21  | 41 | 81 | 2 |
| 1067.295 | -0.42528 | 64.5 | 11825.45 | 39 | 83 | 2 |
| 1080.303 | -0.07304 | 65   | 5961.58  | 40 | 84 | 2 |

c)

| Mass (m/z) | Deviation (ppm) | DBE | Intensity (AU) | H | C | O |
|------------|-----------------|-----|----------------|---|---|---|
| 85.0293    | -2.39799        | 2.5 | 5050.53        | 5 | 4 | 2 |
| 92.9981    | -1.11723        | 5.5 | 8640.46        | 1 | 5 | 2 |
| 95.0138    | -0.56729        | 4.5 | 163947         | 3 | 5 | 2 |
| 97.0294    | -1.07081        | 3.5 | 26981.66       | 5 | 5 | 2 |
| 107.0139   | 0.430785        | 5.5 | 9091.68        | 3 | 6 | 2 |
| 108.0217   | 0.195331        | 5   | 263177.4       | 4 | 6 | 2 |



|          |          |      |          |    |    |   |
|----------|----------|------|----------|----|----|---|
| 109.0295 | -0.03577 | 4.5  | 135806.2 | 5  | 6  | 2 |
| 111.0452 | 0.415146 | 3.5  | 9863.44  | 7  | 6  | 2 |
| 119.0138 | -0.45289 | 6.5  | 102630.2 | 3  | 7  | 2 |
| 120.0217 | 0.175802 | 6    | 6527.03  | 4  | 7  | 2 |
| 121.0295 | -0.03222 | 5.5  | 784922.7 | 5  | 7  | 2 |
| 122.0373 | -0.23681 | 5    | 24277.07 | 6  | 7  | 2 |
| 123.0452 | 0.374659 | 4.5  | 58050.05 | 7  | 7  | 2 |
| 127.0764 | -0.42415 | 2.5  | 9011     | 11 | 7  | 2 |
| 131.0138 | -0.41141 | 7.5  | 3218.14  | 3  | 8  | 2 |
| 132.0216 | -0.59763 | 7    | 46426.82 | 4  | 8  | 2 |
| 133.0295 | -0.02932 | 6.5  | 160342.8 | 5  | 8  | 2 |
| 134.0373 | -0.21561 | 6    | 24906.3  | 6  | 8  | 2 |
| 135.0451 | -0.39913 | 5.5  | 1110759  | 7  | 8  | 2 |
| 137.0607 | -0.75806 | 4.5  | 5380.82  | 9  | 8  | 2 |
| 141.0921 | -0.02764 | 2.5  | 20434.78 | 13 | 8  | 2 |
| 143.0138 | -0.37689 | 8.5  | 8595.77  | 3  | 9  | 2 |
| 145.0294 | -0.71641 | 7.5  | 911478.3 | 5  | 9  | 2 |
| 146.0372 | -0.88265 | 7    | 13643.75 | 6  | 9  | 2 |
| 147.0451 | -0.36655 | 6.5  | 278396.5 | 7  | 9  | 2 |
| 148.053  | 0.142517 | 6    | 4084.72  | 8  | 9  | 2 |
| 149.0607 | -0.69703 | 5.5  | 121129.8 | 9  | 9  | 2 |
| 157.0294 | -0.66166 | 8.5  | 23894.17 | 5  | 10 | 2 |
| 158.0372 | -0.81563 | 8    | 164557.9 | 6  | 10 | 2 |
| 159.0451 | -0.3389  | 7.5  | 572742.6 | 7  | 10 | 2 |
| 161.0608 | -0.02421 | 6.5  | 64698.88 | 9  | 10 | 2 |
| 163.0764 | -0.33052 | 5.5  | 17548.85 | 11 | 10 | 2 |
| 169.0295 | -0.02307 | 9.5  | 148194.7 | 5  | 11 | 2 |
| 170.0373 | -0.16996 | 9    | 2779.99  | 6  | 11 | 2 |
| 171.0451 | -0.31512 | 8.5  | 294621.6 | 7  | 11 | 2 |
| 172.053  | 0.122637 | 8    | 32948.41 | 8  | 11 | 2 |
| 173.0607 | -0.60037 | 7.5  | 154942.7 | 9  | 11 | 2 |
| 175.0764 | -0.30787 | 6.5  | 11991.8  | 11 | 11 | 2 |
| 177.0921 | -0.02202 | 5.5  | 10203.86 | 13 | 11 | 2 |
| 181.0295 | -0.02154 | 10.5 | 3428.19  | 5  | 12 | 2 |
| 182.0374 | 0.390579 | 10   | 73657.85 | 6  | 12 | 2 |
| 183.0451 | -0.29446 | 9.5  | 137611.7 | 7  | 12 | 2 |
| 184.053  | 0.114641 | 9    | 16921.41 | 8  | 12 | 2 |
| 185.0607 | -0.56144 | 8.5  | 144204.4 | 9  | 12 | 2 |
| 187.0764 | -0.28812 | 7.5  | 14766.9  | 11 | 12 | 2 |
| 191.1078 | 0.241225 | 5.5  | 6478.64  | 15 | 12 | 2 |
| 193.0295 | -0.0202  | 11.5 | 17307.5  | 5  | 13 | 2 |
| 195.0451 | -0.27635 | 10.5 | 243982.1 | 7  | 13 | 2 |
| 196.053  | 0.107624 | 10   | 14768.3  | 8  | 13 | 2 |
| 197.0608 | -0.01979 | 9.5  | 93692.02 | 9  | 13 | 2 |
| 198.0686 | -0.14591 | 9    | 2814.82  | 10 | 13 | 2 |
| 199.0765 | 0.231569 | 8.5  | 30070.84 | 11 | 13 | 2 |

|          |          |      |          |    |    |   |
|----------|----------|------|----------|----|----|---|
| 200.9985 | 1.473147 | 14.5 | 3200     | 1  | 14 | 2 |
| 203.0142 | 1.70481  | 13.5 | 4005.04  | 3  | 14 | 2 |
| 205.1235 | 0.468498 | 5.5  | 3800.02  | 17 | 13 | 2 |
| 206.0374 | 0.345083 | 12   | 5692.27  | 6  | 14 | 2 |
| 207.0452 | 0.222657 | 11.5 | 22011.63 | 7  | 14 | 2 |
| 208.053  | 0.101416 | 11   | 42398.91 | 8  | 14 | 2 |
| 209.0608 | -0.01865 | 10.5 | 138609.8 | 9  | 14 | 2 |
| 210.0687 | 0.338461 | 10   | 5496.41  | 10 | 14 | 2 |
| 211.0765 | 0.218404 | 9.5  | 67111.91 | 11 | 14 | 2 |
| 217.0297 | 0.903564 | 13.5 | 3096.86  | 5  | 15 | 2 |
| 219.0452 | 0.210459 | 12.5 | 67372.44 | 7  | 15 | 2 |
| 220.053  | 0.095886 | 12   | 4789.21  | 8  | 15 | 2 |
| 221.0609 | 0.434722 | 11.5 | 82464.53 | 9  | 15 | 2 |
| 222.0687 | 0.320171 | 11   | 8889.72  | 10 | 15 | 2 |
| 223.0765 | 0.206656 | 10.5 | 35554.05 | 11 | 15 | 2 |
| 225.0922 | 0.426936 | 9.5  | 4172.78  | 13 | 15 | 2 |
| 231.0454 | 1.06516  | 13.5 | 2973.94  | 7  | 16 | 2 |
| 232.0531 | 0.521864 | 13   | 34340.85 | 8  | 16 | 2 |
| 233.0609 | 0.412339 | 12.5 | 43526.96 | 9  | 16 | 2 |
| 233.1548 | 0.412173 | 5.5  | 4146.5   | 21 | 15 | 2 |
| 234.0687 | 0.303757 | 12   | 6649.54  | 10 | 16 | 2 |
| 235.0766 | 0.6215   | 11.5 | 48522.84 | 11 | 16 | 2 |
| 237.0922 | 0.405328 | 10.5 | 6049.93  | 13 | 16 | 2 |
| 243.0453 | 0.601123 | 14.5 | 9284.64  | 7  | 17 | 2 |
| 245.061  | 0.80021  | 13.5 | 69178.84 | 9  | 17 | 2 |
| 246.0689 | 1.101725 | 13   | 7189.9   | 10 | 17 | 2 |
| 247.0766 | 0.591315 | 12.5 | 29720.69 | 11 | 17 | 2 |
| 249.0924 | 1.188717 | 11.5 | 12812.06 | 13 | 17 | 2 |
| 256.0532 | 0.863493 | 15   | 7627.48  | 8  | 18 | 2 |
| 257.0612 | 1.540881 | 14.5 | 10530.73 | 9  | 18 | 2 |
| 258.0689 | 1.050496 | 14   | 8817.35  | 10 | 18 | 2 |
| 259.0767 | 0.949913 | 13.5 | 36562.56 | 11 | 18 | 2 |
| 261.0924 | 1.134083 | 12.5 | 5859.32  | 13 | 18 | 2 |
| 269.0612 | 1.472158 | 15.5 | 31064.06 | 9  | 19 | 2 |
| 271.0768 | 1.276762 | 14.5 | 23825.15 | 11 | 19 | 2 |
| 273.0925 | 1.450426 | 13.5 | 7217.03  | 13 | 19 | 2 |
| 282.0688 | 0.60659  | 16   | 7777.3   | 10 | 20 | 2 |
| 283.0767 | 0.869376 | 15.5 | 15255.86 | 11 | 20 | 2 |
| 285.0923 | 0.687848 | 14.5 | 8391.99  | 13 | 20 | 2 |
| 293.0611 | 1.010371 | 17.5 | 5405.45  | 9  | 21 | 2 |
| 295.0765 | 0.156231 | 16.5 | 13105    | 11 | 21 | 2 |
| 297.0922 | 0.323469 | 15.5 | 6582.56  | 13 | 21 | 2 |
| 309.0921 | -0.01262 | 16.5 | 4581.85  | 13 | 22 | 2 |
| 319.0764 | -0.16893 | 18.5 | 6547.05  | 11 | 23 | 2 |

**Supplementary Table 8:** Output from SIMSMFP on all sulfonated species ( $C_nH_nSO_3^-$ ) found in negative ion depth profile datasets from different engine deposits. a. injector tip 1, b. injector tip 2, c. injector needle 1.

a)

| Mass (m/z) | Deviation (ppm) | DBE | Intensity (AU) | H  | C  | O | S |
|------------|-----------------|-----|----------------|----|----|---|---|
| 94.9808    | -0.420084725    | 0.5 | 261373.59      | 3  | 1  | 3 | 1 |
| 106.9809   | 0.561782839     | 1.5 | 129002.6       | 3  | 2  | 3 | 1 |
| 108.9966   | 1.010124272     | 0.5 | 86666.45       | 5  | 2  | 3 | 1 |
| 120.9964   | -0.74299676     | 1.5 | 51336.2        | 5  | 3  | 3 | 1 |
| 123.0122   | 0.488569665     | 0.5 | 112313.66      | 7  | 3  | 3 | 1 |
| 155.9884   | -1.698200316    | 5   | 514526.43      | 4  | 6  | 3 | 1 |
| 156.9965   | 0.064332648     | 4.5 | 4905764.45     | 5  | 6  | 3 | 1 |
| 165.9727   | -1.897296378    | 7   | 54647.67       | 2  | 7  | 3 | 1 |
| 170.0041   | -1.264085563    | 5   | 8642757.7      | 6  | 7  | 3 | 1 |
| 171.0122   | 0.351437038     | 4.5 | 7770542.57     | 7  | 7  | 3 | 1 |
| 179.9884   | -1.471759348    | 7   | 215954.85      | 4  | 8  | 3 | 1 |
| 180.9964   | -0.496694715    | 6.5 | 504599.65      | 5  | 8  | 3 | 1 |
| 182.004    | -1.730178761    | 6   | 1633013.89     | 6  | 8  | 3 | 1 |
| 183.0121   | -0.218018324    | 5.5 | 141185515.7    | 7  | 8  | 3 | 1 |
| 184.0198   | -0.896098421    | 5   | 4768474.31     | 8  | 8  | 3 | 1 |
| 185.0279   | 0.59504575      | 4.5 | 149150.56      | 9  | 8  | 3 | 1 |
| 191.9884   | -1.379768957    | 8   | 73957.05       | 4  | 9  | 3 | 1 |
| 194.004    | -1.623159775    | 7   | 3651125.19     | 6  | 9  | 3 | 1 |
| 195.0122   | 0.308185942     | 6.5 | 2232912.79     | 7  | 9  | 3 | 1 |
| 196.0198   | -0.84124084     | 6   | 4518536.76     | 8  | 9  | 3 | 1 |
| 197.0279   | 0.558804421     | 5.5 | 5889233.53     | 9  | 9  | 3 | 1 |
| 198.0353   | -1.590118021    | 5   | 450776.03      | 10 | 9  | 3 | 1 |
| 206.004    | -1.528608758    | 8   | 1789043.18     | 6  | 10 | 3 | 1 |
| 207.0121   | -0.19274232     | 7.5 | 443281.45      | 7  | 10 | 3 | 1 |
| 208.0197   | -1.273435462    | 7   | 2634609.47     | 8  | 10 | 3 | 1 |
| 209.0279   | 0.526724222     | 6.5 | 13389238.08    | 9  | 10 | 3 | 1 |
| 210.0353   | -1.499269541    | 6   | 3005210.96     | 10 | 10 | 3 | 1 |
| 211.0436   | 0.758611592     | 5.5 | 620065.12      | 11 | 10 | 3 | 1 |
| 218.004    | -1.444466822    | 9   | 583541.52      | 6  | 11 | 3 | 1 |
| 220.0197   | -1.203981648    | 8   | 5633611.37     | 8  | 11 | 3 | 1 |
| 221.0279   | 0.498127408     | 7.5 | 367301.03      | 9  | 11 | 3 | 1 |
| 222.0354   | -0.967862746    | 7   | 1121719.73     | 10 | 11 | 3 | 1 |
| 223.0435   | 0.269454237     | 6.5 | 1126679.25     | 11 | 11 | 3 | 1 |
| 224.051    | -1.182318699    | 6   | 486228.23      | 12 | 11 | 3 | 1 |
| 225.059    | -0.399450651    | 5.5 | 877724.88      | 13 | 11 | 3 | 1 |
| 230.0042   | -0.499555846    | 10  | 244845.09      | 6  | 12 | 3 | 1 |
| 231.0119   | -1.038473563    | 9.5 | 292789.85      | 7  | 12 | 3 | 1 |
| 232.0196   | -1.572709487    | 9   | 2679452.26     | 8  | 12 | 3 | 1 |
| 233.028    | 0.901609203     | 8.5 | 6192113.08     | 9  | 12 | 3 | 1 |
| 234.0354   | -0.918236312    | 8   | 4144505.16     | 10 | 12 | 3 | 1 |
| 234.1293   | -0.917868045    | 1   | 57271.17       | 22 | 11 | 3 | 1 |
| 235.0437   | 1.106603954     | 7.5 | 184100.2       | 11 | 12 | 3 | 1 |

|          |              |      |            |    |    |   |   |
|----------|--------------|------|------------|----|----|---|---|
| 236.0509 | -1.545850645 | 7    | 1945855.88 | 12 | 12 | 3 | 1 |
| 237.0591 | 0.042605411  | 6.5  | 234055.77  | 13 | 12 | 3 | 1 |
| 238.0665 | -1.742787318 | 6    | 3204620.22 | 14 | 12 | 3 | 1 |
| 239.075  | 1.087944298  | 5.5  | 908240.48  | 15 | 12 | 3 | 1 |
| 240.0821 | -1.936417166 | 5    | 2293880.34 | 16 | 12 | 3 | 1 |
| 242.0043 | -0.06156915  | 11   | 72926.15   | 6  | 13 | 3 | 1 |
| 242.0978 | -1.713767283 | 4    | 430383.1   | 18 | 12 | 3 | 1 |
| 243.0121 | -0.164189328 | 10.5 | 78745.32   | 7  | 13 | 3 | 1 |
| 244.0199 | -0.265961845 | 10   | 2261087.22 | 8  | 13 | 3 | 1 |
| 244.1135 | -1.494794244 | 3    | 176207.31  | 20 | 12 | 3 | 1 |
| 245.0277 | -0.366897159 | 9.5  | 135539.44  | 9  | 13 | 3 | 1 |
| 246.0355 | -0.46700556  | 9    | 1987727.63 | 10 | 13 | 3 | 1 |
| 246.1291 | -1.685697874 | 2    | 167600.15  | 22 | 12 | 3 | 1 |
| 248.0512 | -0.261639464 | 8    | 710262.41  | 12 | 13 | 3 | 1 |
| 248.1448 | -1.470510216 | 1    | 146361.33  | 24 | 12 | 3 | 1 |
| 249.0588 | -1.163980805 | 7.5  | 203898.84  | 13 | 13 | 3 | 1 |
| 250.0667 | -0.859369982 | 7    | 245514.21  | 14 | 13 | 3 | 1 |
| 251.0745 | -0.955492377 | 6.5  | 816037.41  | 15 | 13 | 3 | 1 |
| 252.0822 | -1.447541603 | 6    | 465611.5   | 16 | 13 | 3 | 1 |
| 253.0905 | 0.435022444  | 5.5  | 547578.17  | 17 | 13 | 3 | 1 |
| 254.0044 | 0.335033679  | 12   | 51305.21   | 6  | 14 | 3 | 1 |
| 254.0979 | -1.239284582 | 5    | 718169.71  | 18 | 13 | 3 | 1 |
| 255.0124 | 1.019951443  | 11.5 | 75634.71   | 7  | 14 | 3 | 1 |
| 255.1058 | -0.940393258 | 4.5  | 48493.42   | 19 | 13 | 3 | 1 |
| 256.02   | 0.137098683  | 11   | 754968.79  | 8  | 14 | 3 | 1 |
| 256.1136 | -1.034305582 | 4    | 156492.67  | 20 | 13 | 3 | 1 |
| 257.0279 | 0.42835835   | 10.5 | 311800.3   | 9  | 14 | 3 | 1 |
| 258.0356 | -0.057743967 | 10   | 2716975.76 | 10 | 14 | 3 | 1 |
| 258.1294 | -0.445125386 | 3    | 54171.49   | 22 | 13 | 3 | 1 |
| 259.0434 | -0.15402822  | 9.5  | 130235.78  | 11 | 14 | 3 | 1 |
| 260.0512 | -0.249566177 | 9    | 2173572.54 | 12 | 14 | 3 | 1 |
| 261.0586 | -1.876586639 | 8.5  | 199613.79  | 13 | 14 | 3 | 1 |
| 262.0667 | -0.820019574 | 8    | 1924422    | 14 | 14 | 3 | 1 |
| 263.0747 | -0.151667925 | 7.5  | 81159.9    | 15 | 14 | 3 | 1 |
| 264.0823 | -1.003095377 | 7    | 1908615.45 | 16 | 14 | 3 | 1 |
| 265.0906 | 0.792559851  | 6.5  | 310650.91  | 17 | 14 | 3 | 1 |
| 266.098  | -0.807596549 | 6    | 468105.99  | 18 | 14 | 3 | 1 |
| 267.0126 | 1.723142626  | 12.5 | 51235.91   | 7  | 15 | 3 | 1 |
| 267.1063 | 0.973770567  | 5.5  | 234859.39  | 19 | 14 | 3 | 1 |
| 268.0201 | 0.504066927  | 12   | 511258.9   | 8  | 15 | 3 | 1 |
| 268.1137 | -0.615037197 | 5    | 165512.75  | 20 | 14 | 3 | 1 |
| 269.0282 | 1.524377835  | 11.5 | 104144.08  | 9  | 15 | 3 | 1 |
| 270.0357 | 0.315143615  | 11   | 2582643.49 | 10 | 15 | 3 | 1 |
| 270.1292 | -1.16573711  | 4    | 66318.94   | 22 | 14 | 3 | 1 |
| 271.0438 | 1.328569325  | 10.5 | 166619.54  | 11 | 15 | 3 | 1 |
| 272.0514 | 0.496597581  | 10   | 991200.32  | 12 | 15 | 3 | 1 |

|          |              |      |            |    |    |   |   |
|----------|--------------|------|------------|----|----|---|---|
| 272.145  | -0.605926621 | 3    | 53103.06   | 24 | 14 | 3 | 1 |
| 273.0591 | 0.036988331  | 9.5  | 131410.49  | 13 | 15 | 3 | 1 |
| 274.067  | 0.310508111  | 9    | 376499.58  | 14 | 15 | 3 | 1 |
| 275.0745 | -0.872126609 | 8.5  | 393037.77  | 15 | 15 | 3 | 1 |
| 276.0823 | -0.959495578 | 8    | 243170.22  | 16 | 15 | 3 | 1 |
| 277.09   | -1.407122059 | 7.5  | 286926.09  | 17 | 15 | 3 | 1 |
| 278.0978 | -1.491918962 | 7    | 480990.74  | 18 | 15 | 3 | 1 |
| 279.1061 | 0.215330345  | 6.5  | 116820.85  | 19 | 15 | 3 | 1 |
| 280.0199 | -0.231769188 | 13   | 219786.3   | 8  | 16 | 3 | 1 |
| 280.1135 | -1.302684536 | 6    | 186446.52  | 20 | 15 | 3 | 1 |
| 281.028  | 0.747612896  | 12.5 | 260817.56  | 9  | 16 | 3 | 1 |
| 281.1219 | 0.74736318   | 5.5  | 160669.64  | 21 | 15 | 3 | 1 |
| 282.0355 | -0.407395357 | 12   | 1344841.97 | 10 | 16 | 3 | 1 |
| 282.1292 | -1.116154048 | 5    | 52881.08   | 22 | 15 | 3 | 1 |
| 283.0436 | 0.565637558  | 11.5 | 188267.27  | 11 | 16 | 3 | 1 |
| 284.0512 | -0.228479884 | 11   | 2464660.86 | 12 | 16 | 3 | 1 |
| 285.0595 | 1.438649089  | 10.5 | 78606.51   | 13 | 16 | 3 | 1 |
| 286.0667 | -0.751222839 | 10   | 1405087.16 | 14 | 16 | 3 | 1 |
| 287.0751 | 1.254377171  | 9.5  | 68547.05   | 15 | 16 | 3 | 1 |
| 288.0823 | -0.919528053 | 9    | 1443678.34 | 16 | 16 | 3 | 1 |
| 290.098  | -0.7407836   | 8    | 521613.2   | 18 | 16 | 3 | 1 |
| 291.106  | -0.137063457 | 7.5  | 77671.13   | 19 | 16 | 3 | 1 |
| 291.2004 | 1.580014062  | 0.5  | 51973.11   | 31 | 15 | 3 | 1 |
| 292.0202 | 0.80508194   | 14   | 100077.29  | 8  | 17 | 3 | 1 |
| 292.1136 | -0.906838161 | 7    | 146163.73  | 20 | 16 | 3 | 1 |
| 293.122  | 1.057922394  | 6.5  | 72925.86   | 21 | 16 | 3 | 1 |
| 294.0357 | 0.289420722  | 13   | 1292145.6  | 10 | 17 | 3 | 1 |
| 294.1293 | -0.730630519 | 6    | 64152.45   | 22 | 16 | 3 | 1 |
| 295.0435 | 0.203698818  | 12.5 | 175075.09  | 11 | 17 | 3 | 1 |
| 295.1375 | 0.542459317  | 5.5  | 161630.07  | 23 | 16 | 3 | 1 |
| 296.0511 | -0.556998127 | 12   | 1309967.94 | 12 | 17 | 3 | 1 |
| 297.0591 | 0.03399997   | 11.5 | 140930.05  | 13 | 17 | 3 | 1 |
| 297.1532 | 0.707043197  | 4.5  | 1738427.73 | 25 | 16 | 3 | 1 |
| 298.0667 | -0.720979046 | 11   | 629919.73  | 14 | 17 | 3 | 1 |
| 299.0745 | -0.802140629 | 10.5 | 157535.58  | 15 | 17 | 3 | 1 |
| 300.0823 | -0.882757051 | 10   | 195072.46  | 16 | 17 | 3 | 1 |
| 301.0901 | -0.962833786 | 9.5  | 238337.35  | 17 | 17 | 3 | 1 |
| 302.0978 | -1.373394411 | 9    | 301179.34  | 18 | 17 | 3 | 1 |
| 303.1058 | -0.791472186 | 8.5  | 68034.14   | 19 | 17 | 3 | 1 |
| 304.0201 | 0.444378711  | 15   | 91314.69   | 8  | 18 | 3 | 1 |
| 304.1135 | -1.199879526 | 8    | 205149.56  | 20 | 17 | 3 | 1 |
| 305.0282 | 1.344467664  | 14.5 | 82749.99   | 9  | 18 | 3 | 1 |
| 305.2158 | 0.688365886  | 0.5  | 82267.79   | 33 | 16 | 3 | 1 |
| 306.0355 | -0.375446498 | 14   | 524107.65  | 10 | 18 | 3 | 1 |
| 306.1292 | -1.02864959  | 7    | 62049.07   | 22 | 17 | 3 | 1 |
| 307.0437 | 0.847111406  | 13.5 | 222771.1   | 11 | 18 | 3 | 1 |

|          |              |      |             |    |    |   |   |
|----------|--------------|------|-------------|----|----|---|---|
| 307.1376 | 0.846852421  | 6.5  | 58172.15    | 23 | 17 | 3 | 1 |
| 308.0511 | -0.535300512 | 13   | 1693945.61  | 12 | 18 | 3 | 1 |
| 309.0596 | 1.650493438  | 12.5 | 111657.77   | 13 | 18 | 3 | 1 |
| 309.1533 | 1.003063241  | 5.5  | 226643.29   | 25 | 17 | 3 | 1 |
| 310.0668 | -0.370565173 | 12   | 1450304.07  | 14 | 18 | 3 | 1 |
| 311.1689 | 0.835881148  | 4.5  | 14513907.43 | 27 | 17 | 3 | 1 |
| 312.0823 | -0.848813839 | 11   | 1027687.77  | 16 | 18 | 3 | 1 |
| 313.0909 | 1.629241958  | 10.5 | 48643.8     | 17 | 18 | 3 | 1 |
| 314.0979 | -1.002552657 | 10   | 576457.83   | 18 | 18 | 3 | 1 |
| 315.1063 | 0.825436415  | 9.5  | 48362.04    | 19 | 18 | 3 | 1 |
| 318.0354 | -0.675710486 | 15   | 265197.81   | 10 | 19 | 3 | 1 |
| 318.1289 | -1.932860584 | 8    | 56900.84    | 22 | 18 | 3 | 1 |
| 319.0438 | 1.128686426  | 14.5 | 88635.29    | 11 | 19 | 3 | 1 |
| 319.2312 | -0.124987767 | 0.5  | 72543.83    | 35 | 17 | 3 | 1 |
| 320.051  | -0.827679903 | 14   | 788120.88   | 12 | 19 | 3 | 1 |
| 321.0592 | 0.342927528  | 13.5 | 148364.39   | 13 | 19 | 3 | 1 |
| 322.0666 | -0.977747125 | 13   | 546664.31   | 14 | 19 | 3 | 1 |
| 323.0747 | -0.123500835 | 12.5 | 103513.8    | 15 | 19 | 3 | 1 |
| 323.1687 | 0.185971015  | 5.5  | 206446      | 27 | 18 | 3 | 1 |
| 324.0823 | -0.817384299 | 12   | 222583.98   | 16 | 19 | 3 | 1 |
| 325.0901 | -0.891751983 | 11.5 | 153514.74   | 17 | 19 | 3 | 1 |
| 325.1844 | 0.338577242  | 4.5  | 16960296.04 | 29 | 18 | 3 | 1 |
| 326.0978 | -1.272316072 | 11   | 156397.35   | 18 | 19 | 3 | 1 |
| 327.106  | -0.121978793 | 10.5 | 63592.44    | 19 | 19 | 3 | 1 |
| 328.1134 | -1.416886178 | 10   | 146004.87   | 20 | 19 | 3 | 1 |
| 330.0354 | -0.651141848 | 16   | 143744.04   | 10 | 20 | 3 | 1 |
| 330.1292 | -0.95386806  | 9    | 61468.58    | 22 | 19 | 3 | 1 |
| 331.0438 | 1.08777265   | 15.5 | 123458.7    | 11 | 20 | 3 | 1 |
| 332.0511 | -0.496610064 | 15   | 593290.66   | 12 | 20 | 3 | 1 |
| 333.0596 | 1.531560061  | 14.5 | 110457.53   | 13 | 20 | 3 | 1 |
| 333.2473 | 1.230619137  | 0.5  | 69943.32    | 37 | 18 | 3 | 1 |
| 334.0667 | -0.643284296 | 14   | 958405.41   | 14 | 20 | 3 | 1 |
| 334.2541 | -1.839615038 | 0    | 50802.7     | 38 | 18 | 3 | 1 |
| 335.0753 | 1.671567365  | 13.5 | 55788.79    | 15 | 20 | 3 | 1 |
| 336.0823 | -0.788199174 | 13   | 701764.14   | 16 | 20 | 3 | 1 |
| 337.1845 | 0.623101391  | 5.5  | 136200.17   | 29 | 19 | 3 | 1 |
| 338.0979 | -0.931386166 | 12   | 477642.44   | 18 | 20 | 3 | 1 |
| 339.2    | 0.177181635  | 4.5  | 6239694.28  | 31 | 19 | 3 | 1 |
| 340.1133 | -1.660914354 | 11   | 130392.74   | 20 | 20 | 3 | 1 |
| 342.0356 | -0.043562715 | 17   | 75819.28    | 10 | 21 | 3 | 1 |
| 342.129  | -1.50498562  | 10   | 56089.23    | 22 | 20 | 3 | 1 |
| 343.0439 | 1.341229554  | 16.5 | 62972.34    | 11 | 21 | 3 | 1 |
| 344.0511 | -0.479289039 | 16   | 373787.13   | 12 | 21 | 3 | 1 |
| 345.0595 | 1.188492093  | 15.5 | 107713.77   | 13 | 21 | 3 | 1 |
| 346.0667 | -0.620978171 | 15   | 386268.1    | 14 | 21 | 3 | 1 |
| 347.075  | 0.749406309  | 14.5 | 112298.69   | 15 | 21 | 3 | 1 |

|          |              |      |            |    |    |   |   |
|----------|--------------|------|------------|----|----|---|---|
| 348.0826 | 0.100838144  | 14   | 3774944.25 | 16 | 21 | 3 | 1 |
| 349.0906 | 0.601849853  | 13.5 | 84705.78   | 17 | 21 | 3 | 1 |
| 350.0979 | -0.899461884 | 13   | 128879.47  | 18 | 21 | 3 | 1 |
| 351.106  | -0.113640882 | 12.5 | 79597.43   | 19 | 21 | 3 | 1 |
| 351.2    | 0.171127592  | 5.5  | 79729.82   | 31 | 20 | 3 | 1 |
| 352.1134 | -1.320311542 | 12   | 126597.34  | 20 | 21 | 3 | 1 |
| 354.0357 | 0.240371297  | 18   | 65176.01   | 10 | 22 | 3 | 1 |
| 354.1292 | -0.88922269  | 11   | 63907.33   | 22 | 21 | 3 | 1 |
| 356.0511 | -0.463135555 | 17   | 217657.22  | 12 | 22 | 3 | 1 |
| 357.0596 | 1.428615079  | 16.5 | 98215.94   | 13 | 22 | 3 | 1 |
| 358.0668 | -0.320889742 | 16   | 583451.77  | 14 | 22 | 3 | 1 |
| 359.0754 | 1.838335941  | 15.5 | 68978.29   | 15 | 22 | 3 | 1 |
| 360.0824 | -0.457950526 | 15   | 483244.8   | 16 | 22 | 3 | 1 |
| 362.0979 | -0.869653556 | 14   | 373951.78  | 18 | 22 | 3 | 1 |
| 364.1135 | -1.002159037 | 13   | 160929.89  | 20 | 22 | 3 | 1 |
| 365.2157 | 0.301465773  | 5.5  | 63505.06   | 33 | 21 | 3 | 1 |
| 366.1289 | -1.679460341 | 12   | 57665.28   | 22 | 22 | 3 | 1 |
| 368.0512 | -0.176334131 | 18   | 134523.93  | 12 | 23 | 3 | 1 |
| 369.0596 | 1.382163491  | 17.5 | 75368.22   | 13 | 23 | 3 | 1 |
| 370.0667 | -0.58070579  | 17   | 258332.04  | 14 | 23 | 3 | 1 |
| 371.0751 | 0.970424449  | 16.5 | 86815.16   | 15 | 23 | 3 | 1 |
| 372.0824 | -0.443181207 | 16   | 178903.16  | 16 | 23 | 3 | 1 |
| 374.098  | -0.574448077 | 15   | 112004.21  | 18 | 23 | 3 | 1 |
| 376.1135 | -0.97018492  | 14   | 102930.09  | 20 | 23 | 3 | 1 |
| 378.1291 | -1.097243097 | 13   | 58249.44   | 22 | 23 | 3 | 1 |
| 379.2314 | 0.422169861  | 5.5  | 184481.72  | 35 | 22 | 3 | 1 |
| 380.0513 | 0.092355961  | 19   | 89982.23   | 12 | 24 | 3 | 1 |
| 381.247  | 0.288789241  | 4.5  | 9662373.54 | 37 | 22 | 3 | 1 |
| 382.0668 | -0.300732661 | 18   | 272405.64  | 14 | 24 | 3 | 1 |
| 384.0824 | -0.429334771 | 17   | 343753.12  | 16 | 24 | 3 | 1 |
| 386.0979 | -0.815595587 | 16   | 316014.57  | 18 | 24 | 3 | 1 |
| 388.1135 | -0.940188004 | 15   | 157230.41  | 20 | 24 | 3 | 1 |
| 390.1294 | -0.294517578 | 14   | 60786.9    | 22 | 24 | 3 | 1 |
| 392.0517 | 1.109803842  | 20   | 58962.85   | 12 | 25 | 3 | 1 |
| 393.247  | 0.279976785  | 5.5  | 57952.11   | 37 | 23 | 3 | 1 |
| 394.0668 | -0.291574846 | 19   | 150920.78  | 14 | 25 | 3 | 1 |
| 395.0753 | 1.417706432  | 18.5 | 67698.03   | 15 | 25 | 3 | 1 |
| 396.0826 | 0.088617887  | 18   | 139302.36  | 16 | 25 | 3 | 1 |
| 398.0983 | 0.213766344  | 17   | 106090.03  | 18 | 25 | 3 | 1 |
| 400.1137 | -0.412132682 | 16   | 79313.46   | 20 | 25 | 3 | 1 |
| 402.1292 | -0.783081043 | 15   | 57559.4    | 22 | 25 | 3 | 1 |
| 404.0513 | 0.086870165  | 21   | 62247.49   | 12 | 26 | 3 | 1 |
| 406.0668 | -0.28295829  | 20   | 136513.89  | 14 | 26 | 3 | 1 |
| 407.2627 | 0.393112512  | 5.5  | 5732989.9  | 39 | 24 | 3 | 1 |
| 408.0825 | -0.159036444 | 19   | 230788.43  | 16 | 26 | 3 | 1 |
| 409.2783 | 0.269010181  | 4.5  | 8039727.68 | 41 | 24 | 3 | 1 |

|          |              |      |            |    |    |   |   |
|----------|--------------|------|------------|----|----|---|---|
| 410.098  | -0.524020813 | 18   | 230235.98  | 18 | 26 | 3 | 1 |
| 412.1136 | -0.642783518 | 17   | 143848.03  | 20 | 26 | 3 | 1 |
| 414.1294 | -0.277449435 | 16   | 57987.43   | 22 | 26 | 3 | 1 |
| 418.067  | 0.203555931  | 21   | 82882.18   | 14 | 27 | 3 | 1 |
| 420.0827 | 0.321603445  | 20   | 110641.48  | 16 | 27 | 3 | 1 |
| 421.2785 | 0.736093174  | 5.5  | 106901.87  | 41 | 25 | 3 | 1 |
| 422.0986 | 0.912346905  | 19   | 85641.62   | 18 | 27 | 3 | 1 |
| 424.1142 | 0.790118003  | 18   | 67881.51   | 20 | 27 | 3 | 1 |
| 426.1294 | -0.269636334 | 17   | 51848.13   | 22 | 27 | 3 | 1 |
| 430.067  | 0.197876184  | 22   | 83696.75   | 14 | 28 | 3 | 1 |
| 432.0825 | -0.150202775 | 21   | 148378.58  | 16 | 28 | 3 | 1 |
| 433.2786 | 0.946505062  | 6.5  | 51109.21   | 41 | 26 | 3 | 1 |
| 434.098  | -0.49504926  | 20   | 178896.87  | 18 | 28 | 3 | 1 |
| 435.2939 | 0.138067655  | 5.5  | 3852620.9  | 43 | 26 | 3 | 1 |
| 436.1137 | -0.378112262 | 19   | 126579.72  | 20 | 28 | 3 | 1 |
| 437.3096 | 0.251766775  | 4.5  | 4690758.18 | 45 | 26 | 3 | 1 |
| 438.1294 | -0.262251221 | 18   | 75989.59   | 22 | 28 | 3 | 1 |
| 442.0674 | 1.097345184  | 23   | 50473.5    | 14 | 29 | 3 | 1 |
| 444.083  | 0.979772759  | 22   | 83331.62   | 16 | 29 | 3 | 1 |
| 446.0987 | 1.087428696  | 21   | 74751.87   | 18 | 29 | 3 | 1 |
| 448.1141 | 0.524643441  | 20   | 69050.31   | 20 | 29 | 3 | 1 |
| 449.3096 | 0.245042676  | 5.5  | 139211.38  | 45 | 27 | 3 | 1 |
| 450.1297 | 0.411214981  | 19   | 56669.77   | 22 | 29 | 3 | 1 |
| 452.0518 | 1.183715303  | 25   | 45316.75   | 12 | 30 | 3 | 1 |
| 454.0674 | 1.06834474   | 24   | 43834.49   | 14 | 30 | 3 | 1 |
| 456.0828 | 0.515476841  | 23   | 99690.81   | 16 | 30 | 3 | 1 |
| 458.0983 | 0.185768024  | 22   | 126315.82  | 18 | 30 | 3 | 1 |
| 460.1137 | -0.358389548 | 21   | 146097.21  | 20 | 30 | 3 | 1 |
| 462.1295 | -0.032242044 | 20   | 89493.38   | 22 | 30 | 3 | 1 |
| 463.3255 | 0.777207988  | 5.5  | 1945050.99 | 47 | 28 | 3 | 1 |
| 465.3408 | 0.021704523  | 4.5  | 1865174.22 | 49 | 28 | 3 | 1 |
| 468.0827 | 0.288624294  | 24   | 47688.3    | 16 | 31 | 3 | 1 |
| 470.0984 | 0.393747507  | 23   | 72481.41   | 18 | 31 | 3 | 1 |
| 472.1144 | 1.133413017  | 22   | 58411.33   | 20 | 31 | 3 | 1 |
| 477.3408 | 0.021158887  | 5.5  | 99606.31   | 49 | 29 | 3 | 1 |
| 480.0823 | -0.551780088 | 25   | 59986.45   | 16 | 32 | 3 | 1 |
| 482.0979 | -0.653186405 | 24   | 101231.75  | 18 | 32 | 3 | 1 |
| 484.1134 | -0.960311269 | 23   | 142643.81  | 20 | 32 | 3 | 1 |
| 486.1298 | 0.586469225  | 22   | 80203.01   | 22 | 32 | 3 | 1 |
| 490.0662 | -1.458780379 | 27   | 50508.57   | 14 | 33 | 3 | 1 |
| 491.3566 | 0.325832709  | 5.5  | 614139.53  | 51 | 30 | 3 | 1 |
| 492.0833 | 1.493855     | 26   | 41565.78   | 16 | 33 | 3 | 1 |
| 493.3723 | 0.425844924  | 4.5  | 107251.41  | 53 | 30 | 3 | 1 |
| 495.1063 | 0.525342005  | 24.5 | 75906.85   | 19 | 33 | 3 | 1 |
| 496.1144 | 1.078583039  | 24   | 41621.94   | 20 | 33 | 3 | 1 |
| 504.0825 | -0.12874875  | 27   | 51486.8    | 16 | 34 | 3 | 1 |



|          |              |      |            |    |    |   |   |
|----------|--------------|------|------------|----|----|---|---|
| 505.3725 | 0.811481299  | 5.5  | 82702.38   | 53 | 31 | 3 | 1 |
| 506.0976 | -1.214981563 | 26   | 83179.76   | 18 | 34 | 3 | 1 |
| 508.1137 | -0.324533557 | 25   | 84929.44   | 20 | 34 | 3 | 1 |
| 510.1291 | -0.813322868 | 24   | 101042.86  | 22 | 34 | 3 | 1 |
| 512.1452 | 0.068535256  | 23   | 45608.48   | 24 | 34 | 3 | 1 |
| 516.082  | -1.094592297 | 28   | 49137.36   | 16 | 35 | 3 | 1 |
| 519.388  | 0.50078194   | 5.5  | 129251.8   | 55 | 32 | 3 | 1 |
| 522.1301 | 1.12060319   | 25   | 41030.58   | 22 | 35 | 3 | 1 |
| 526.0661 | -1.549042483 | 30   | 59219.43   | 14 | 36 | 3 | 1 |
| 528.0817 | -1.637812073 | 29   | 66016.54   | 16 | 36 | 3 | 1 |
| 530.0981 | -0.216752286 | 28   | 63393.37   | 18 | 36 | 3 | 1 |
| 533.4041 | 1.33126263   | 5.5  | 63744.18   | 57 | 33 | 3 | 1 |
| 543.0124 | 0.478994816  | 35.5 | 51645.75   | 7  | 38 | 3 | 1 |
| 543.106  | -0.073466316 | 28.5 | 114859.75  | 19 | 37 | 3 | 1 |
| 544.1148 | 1.718574108  | 28   | 44462.29   | 20 | 37 | 3 | 1 |
| 544.3952 | -0.670284667 | 7    | 68789.96   | 56 | 34 | 3 | 1 |
| 545.1219 | 0.385418529  | 27.5 | 103633.6   | 21 | 37 | 3 | 1 |
| 547.1381 | 1.389230719  | 26.5 | 126365.06  | 23 | 37 | 3 | 1 |
| 547.4196 | 1.023164996  | 5.5  | 66903.96   | 59 | 34 | 3 | 1 |
| 554.0977 | -0.929257641 | 30   | 44069.03   | 18 | 38 | 3 | 1 |
| 556.1132 | -1.195618455 | 29   | 75926.23   | 20 | 38 | 3 | 1 |
| 558.1292 | -0.564205962 | 28   | 101246.45  | 22 | 38 | 3 | 1 |
| 560.1442 | -1.72258918  | 27   | 95040.54   | 24 | 38 | 3 | 1 |
| 569.1224 | 1.247712067  | 29.5 | 125253.21  | 21 | 39 | 3 | 1 |
| 571.1376 | 0.455407101  | 28.5 | 117601.57  | 23 | 39 | 3 | 1 |
| 573.1541 | 1.936830165  | 27.5 | 81851.96   | 25 | 39 | 3 | 1 |
| 575.1681 | -0.938681219 | 26.5 | 60272.26   | 27 | 39 | 3 | 1 |
| 579.1996 | -0.586843983 | 24.5 | 52323.79   | 31 | 39 | 3 | 1 |
| 580.1133 | -0.973774347 | 31   | 85402.53   | 20 | 40 | 3 | 1 |
| 584.1448 | -0.624673492 | 29   | 95058.37   | 24 | 40 | 3 | 1 |
| 586.1619 | 1.851198464  | 28   | 53055.69   | 26 | 40 | 3 | 1 |
| 589.4667 | 1.204649652  | 5.5  | 49525.38   | 65 | 37 | 3 | 1 |
| 591.106  | -0.067500579 | 32.5 | 50804.26   | 19 | 41 | 3 | 1 |
| 593.1228 | 1.871622669  | 31.5 | 94118.24   | 21 | 41 | 3 | 1 |
| 595.1376 | 0.437041978  | 30.5 | 114406.59  | 23 | 41 | 3 | 1 |
| 597.1528 | -0.318008958 | 29.5 | 103836.94  | 25 | 41 | 3 | 1 |
| 600.082  | -0.94137046  | 35   | 53273.93   | 16 | 42 | 3 | 1 |
| 603.482  | 0.596704152  | 5.5  | 111686.08  | 67 | 38 | 3 | 1 |
| 604.1132 | -1.100620328 | 33   | 81791.48   | 20 | 42 | 3 | 1 |
| 605.4977 | 0.677294526  | 4.5  | 5098216.39 | 69 | 38 | 3 | 1 |
| 606.1295 | -0.024582205 | 32   | 83575.51   | 22 | 42 | 3 | 1 |
| 615.1065 | 0.748001109  | 34.5 | 49487.8    | 19 | 43 | 3 | 1 |
| 617.1222 | 0.826579277  | 33.5 | 66183.66   | 21 | 43 | 3 | 1 |
| 619.137  | -0.548989664 | 32.5 | 75816.91   | 23 | 43 | 3 | 1 |
| 621.1535 | 0.821214754  | 31.5 | 75509.38   | 25 | 43 | 3 | 1 |
| 623.1693 | 1.05926383   | 30.5 | 52075.71   | 27 | 43 | 3 | 1 |

|          |              |      |             |    |    |   |   |
|----------|--------------|------|-------------|----|----|---|---|
| 628.113  | -1.376979634 | 35   | 72551.78    | 20 | 44 | 3 | 1 |
| 631.1384 | 1.679666109  | 33.5 | 65084.04    | 23 | 44 | 3 | 1 |
| 631.5133 | 0.570217928  | 5.5  | 234160.71   | 71 | 40 | 3 | 1 |
| 633.529  | 0.647326745  | 4.5  | 9966396.25  | 73 | 40 | 3 | 1 |
| 634.162  | 1.868768887  | 32   | 48933.64    | 26 | 44 | 3 | 1 |
| 637.0892 | -1.867709855 | 37.5 | 45912.57    | 17 | 45 | 3 | 1 |
| 641.1215 | -0.296199619 | 35.5 | 107537.04   | 21 | 45 | 3 | 1 |
| 643.1374 | 0.093448158  | 34.5 | 90740.3     | 23 | 45 | 3 | 1 |
| 645.1541 | 1.720677138  | 33.5 | 74297.35    | 25 | 45 | 3 | 1 |
| 647.1691 | 0.710942978  | 32.5 | 97186.07    | 27 | 45 | 3 | 1 |
| 651.1994 | -0.829084843 | 30.5 | 52916.94    | 31 | 45 | 3 | 1 |
| 652.113  | -1.326302118 | 37   | 59533.69    | 20 | 46 | 3 | 1 |
| 654.129  | -0.787152985 | 36   | 46391.96    | 22 | 46 | 3 | 1 |
| 657.1542 | 1.841428128  | 34.5 | 64527.34    | 25 | 46 | 3 | 1 |
| 659.5446 | 0.545983087  | 5.5  | 228138.41   | 75 | 42 | 3 | 1 |
| 660.1765 | 0.053167603  | 33   | 50308.52    | 28 | 46 | 3 | 1 |
| 661.5604 | 0.771056419  | 4.5  | 10070947.77 | 77 | 42 | 3 | 1 |
| 664.2087 | 1.40784262   | 31   | 46839.5     | 32 | 46 | 3 | 1 |
| 665.1212 | -0.736556945 | 37.5 | 49548       | 21 | 47 | 3 | 1 |
| 667.1371 | -0.359596122 | 36.5 | 64274.5     | 23 | 47 | 3 | 1 |
| 669.1527 | -0.433234259 | 35.5 | 58879.92    | 25 | 47 | 3 | 1 |
| 671.1687 | 0.089545304  | 34.5 | 63946.75    | 27 | 47 | 3 | 1 |
| 678.1288 | -1.054223396 | 38   | 54873.96    | 22 | 48 | 3 | 1 |
| 680.1443 | -1.271640298 | 37   | 55373.96    | 24 | 48 | 3 | 1 |
| 683.1673 | -1.961301971 | 35.5 | 94994.42    | 27 | 48 | 3 | 1 |
| 684.1753 | -1.702630914 | 35   | 78953.48    | 28 | 48 | 3 | 1 |
| 687.5755 | -0.058029987 | 5.5  | 163286.46   | 79 | 44 | 3 | 1 |
| 689.1225 | 1.17555435   | 39.5 | 50395.05    | 21 | 49 | 3 | 1 |
| 689.5915 | 0.449686719  | 4.5  | 7035275.46  | 81 | 44 | 3 | 1 |
| 691.1368 | -0.781176141 | 38.5 | 62187.38    | 23 | 49 | 3 | 1 |
| 695.1683 | -0.488946107 | 36.5 | 60616.44    | 27 | 49 | 3 | 1 |
| 700.2078 | 0.050127979  | 34   | 59085.25    | 32 | 49 | 3 | 1 |
| 702.2228 | -0.875647247 | 33   | 50406.64    | 34 | 49 | 3 | 1 |
| 703.1376 | 0.369913508  | 39.5 | 45134.49    | 23 | 50 | 3 | 1 |
| 715.6071 | 0.363467739  | 5.5  | 70470.4     | 83 | 46 | 3 | 1 |
| 717.6229 | 0.571470384  | 4.5  | 2979082.76  | 85 | 46 | 3 | 1 |
| 727.136  | -1.842705534 | 41.5 | 45401.41    | 23 | 52 | 3 | 1 |
| 740.2402 | 1.53342353   | 35   | 58930.96    | 36 | 52 | 3 | 1 |
| 741.153  | 0.013627416  | 41.5 | 64637.56    | 25 | 53 | 3 | 1 |
| 743.1672 | -1.937514479 | 40.5 | 59147.32    | 27 | 53 | 3 | 1 |
| 745.6542 | 0.549987146  | 4.5  | 770967.23   | 89 | 48 | 3 | 1 |
| 758.1911 | -1.338578943 | 40   | 64345.79    | 30 | 54 | 3 | 1 |
| 765.1528 | -0.24818566  | 43.5 | 55043.73    | 25 | 55 | 3 | 1 |
| 769.1831 | -1.546963473 | 41.5 | 56811.22    | 29 | 55 | 3 | 1 |
| 773.685  | -0.116197147 | 4.5  | 123934.27   | 93 | 50 | 3 | 1 |
| 782.1919 | -0.274740688 | 42   | 81313.49    | 30 | 56 | 3 | 1 |

|          |              |      |           |     |    |   |   |
|----------|--------------|------|-----------|-----|----|---|---|
| 787.1368 | -0.685903174 | 46.5 | 56346.5   | 23  | 57 | 3 | 1 |
| 798.2227 | -0.895613918 | 41   | 48048.26  | 34  | 57 | 3 | 1 |
| 819.2014 | 1.782348764  | 44.5 | 93672.11  | 31  | 59 | 3 | 1 |
| 827.1689 | 0.314446157  | 47.5 | 54025.35  | 27  | 60 | 3 | 1 |
| 829.7478 | 0.132690939  | 4.5  | 66919.48  | 101 | 54 | 3 | 1 |
| 833.215  | -0.707980032 | 44.5 | 46428.72  | 33  | 60 | 3 | 1 |
| 849.5274 | -1.400659159 | 22.5 | 78258.68  | 73  | 58 | 3 | 1 |
| 856.2086 | 0.97534738   | 47   | 67073.71  | 32  | 62 | 3 | 1 |
| 857.7793 | 0.361515033  | 4.5  | 145566.82 | 105 | 56 | 3 | 1 |
| 863.1703 | 1.923262643  | 50.5 | 50111.18  | 27  | 63 | 3 | 1 |
| 867.2923 | -1.775522815 | 41.5 | 51119.66  | 43  | 62 | 3 | 1 |
| 872.2382 | -0.991585948 | 46   | 48968.25  | 36  | 63 | 3 | 1 |
| 874.1612 | 0.440536791  | 52   | 67302.48  | 26  | 64 | 3 | 1 |
| 878.1928 | 0.780125429  | 50   | 62816.43  | 30  | 64 | 3 | 1 |
| 885.2454 | -1.683033306 | 46.5 | 50371.25  | 37  | 64 | 3 | 1 |
| 885.8106 | 0.350074958  | 4.5  | 246736.83 | 109 | 58 | 3 | 1 |
| 898.161  | 0.206087815  | 54   | 52645.29  | 26  | 66 | 3 | 1 |
| 904.2075 | -0.292963642 | 51   | 84271.73  | 32  | 66 | 3 | 1 |
| 911.1701 | 1.6024476    | 54.5 | 53353.97  | 27  | 67 | 3 | 1 |
| 913.1832 | -1.193515933 | 53.5 | 51322.11  | 29  | 67 | 3 | 1 |
| 913.8419 | 0.339336712  | 4.5  | 274144.67 | 113 | 60 | 3 | 1 |
| 915.6685 | -1.026462126 | 17.5 | 49820.45  | 91  | 62 | 3 | 1 |
| 916.2077 | -0.070835462 | 52   | 50684.95  | 32  | 67 | 3 | 1 |
| 920.2409 | 1.994155725  | 50   | 98477.13  | 36  | 67 | 3 | 1 |
| 926.1917 | -0.447963218 | 54   | 50986.54  | 30  | 68 | 3 | 1 |
| 941.8733 | 0.435409071  | 4.5  | 180774.58 | 117 | 62 | 3 | 1 |
| 944.2396 | 0.566699705  | 52   | 60647.54  | 36  | 69 | 3 | 1 |
| 948.2708 | 0.458835387  | 50   | 47639.67  | 40  | 69 | 3 | 1 |
| 962.2862 | 0.192354453  | 50   | 51579.19  | 42  | 70 | 3 | 1 |
| 966.3177 | 0.398523336  | 48   | 49583.8   | 46  | 70 | 3 | 1 |
| 967.2307 | -0.558191235 | 54.5 | 84671.47  | 35  | 71 | 3 | 1 |
| 969.9042 | 0.0104134    | 4.5  | 73990.54  | 121 | 64 | 3 | 1 |
| 991.6999 | -0.846928883 | 21.5 | 51806.8   | 95  | 68 | 3 | 1 |
| 1004.241 | 1.926931612  | 57   | 47898.82  | 36  | 74 | 3 | 1 |
| 1007.734 | 1.44889707   | 20.5 | 53217.47  | 99  | 69 | 3 | 1 |
| 1026.319 | 1.641889867  | 53   | 52590.06  | 46  | 75 | 3 | 1 |
| 1029.246 | -0.767454347 | 58.5 | 46597.14  | 37  | 76 | 3 | 1 |
| 1062.225 | 1.77467374   | 63   | 53077.42  | 34  | 79 | 3 | 1 |
| 1082.031 | 1.857712941  | 4.5  | 61439.88  | 137 | 72 | 3 | 1 |
| 1082.192 | -0.568198559 | 67   | 46703.34  | 30  | 81 | 3 | 1 |
| 1083.037 | -0.290756398 | 4    | 51926.15  | 138 | 72 | 3 | 1 |
| 1109.054 | 1.29398701   | 5    | 59990.23  | 140 | 74 | 3 | 1 |
| 1109.497 | -0.351420417 | 46.5 | 46109.29  | 69  | 80 | 3 | 1 |
| 1109.779 | 0.279425005  | 25.5 | 53329.64  | 105 | 77 | 3 | 1 |
| 1110.062 | 0.819865083  | 4.5  | 89107.88  | 141 | 74 | 3 | 1 |
| 1110.881 | 0.256643217  | 18   | 75897.26  | 118 | 76 | 3 | 1 |

b)

| Mass (m/z) | Deviation (ppm) | DBE | Intensity (AU) | H  | C  | O | S |
|------------|-----------------|-----|----------------|----|----|---|---|
| 93.9728    | -2.28683        | 1   | 2333199.5      | 2  | 1  | 3 | 1 |
| 94.9807    | -1.47293        | 0.5 | 21072048.92    | 3  | 1  | 3 | 1 |
| 104.9653   | 1.048919        | 2.5 | 10841.24       | 1  | 2  | 3 | 1 |
| 106.9809   | 0.561783        | 1.5 | 7320835.87     | 3  | 2  | 3 | 1 |
| 108.9966   | 1.010124        | 0.5 | 2712140.45     | 5  | 2  | 3 | 1 |
| 119.9887   | 0.292528        | 2   | 62284.8        | 4  | 3  | 3 | 1 |
| 120.9965   | 0.083473        | 1.5 | 1697099.17     | 5  | 3  | 3 | 1 |
| 123.0121   | -0.32436        | 0.5 | 1404597.5      | 7  | 3  | 3 | 1 |
| 132.9965   | 0.075942        | 2.5 | 24202.44       | 5  | 4  | 3 | 1 |
| 137.0276   | -1.38585        | 0.5 | 200061.48      | 9  | 4  | 3 | 1 |
| 143.9884   | -1.83973        | 4   | 56083.07       | 4  | 5  | 3 | 1 |
| 149.0276   | -1.27426        | 1.5 | 63754.96       | 9  | 5  | 3 | 1 |
| 154.9809   | 0.38779         | 5.5 | 38011.86       | 3  | 6  | 3 | 1 |
| 155.9886   | -0.41606        | 5   | 604358.14      | 4  | 6  | 3 | 1 |
| 156.9964   | -0.57262        | 4.5 | 6660420.78     | 5  | 6  | 3 | 1 |
| 168.9966   | 0.651493        | 5.5 | 39442.63       | 5  | 7  | 3 | 1 |
| 170.0043   | -0.08764        | 5   | 20941188.06    | 6  | 7  | 3 | 1 |
| 171.0121   | -0.23332        | 4.5 | 2905824.73     | 7  | 7  | 3 | 1 |
| 180.9965   | 0.055802        | 6.5 | 3698739.11     | 5  | 8  | 3 | 1 |
| 183.0122   | 0.328394        | 5.5 | 511433348.8    | 7  | 8  | 3 | 1 |
| 184.0198   | -0.8961         | 5   | 20270630.3     | 8  | 8  | 3 | 1 |
| 185.0276   | -1.02633        | 4.5 | 1067406.08     | 9  | 8  | 3 | 1 |
| 191.0746   | -0.73217        | 1.5 | 382828.95      | 15 | 8  | 3 | 1 |
| 191.9883   | -1.90063        | 8   | 13177.45       | 4  | 9  | 3 | 1 |
| 192.9962   | -1.5021         | 7.5 | 21178.78       | 5  | 9  | 3 | 1 |
| 193.0902   | -0.98348        | 0.5 | 24524.73       | 17 | 8  | 3 | 1 |
| 194.004    | -1.62316        | 7   | 593122.87      | 6  | 9  | 3 | 1 |
| 195.0122   | 0.308186        | 6.5 | 20162138.29    | 7  | 9  | 3 | 1 |
| 196.0199   | -0.33109        | 6   | 8197732.64     | 8  | 9  | 3 | 1 |
| 197.0279   | 0.558804        | 5.5 | 56843043.79    | 9  | 9  | 3 | 1 |
| 198.0355   | -0.5802         | 5   | 1712417.22     | 10 | 9  | 3 | 1 |
| 199.0432   | -1.20526        | 4.5 | 432480.05      | 11 | 9  | 3 | 1 |
| 205.0902   | -0.92593        | 1.5 | 62430.93       | 17 | 9  | 3 | 1 |
| 207.0121   | -0.19274        | 7.5 | 8243816.36     | 7  | 10 | 3 | 1 |
| 208.0196   | -1.75416        | 7   | 150988.63      | 8  | 10 | 3 | 1 |
| 209.0278   | 0.048319        | 6.5 | 8199712.19     | 9  | 10 | 3 | 1 |
| 210.0352   | -1.97538        | 6   | 1510177.41     | 10 | 10 | 3 | 1 |
| 211.0433   | -0.6629         | 5.5 | 4734852.41     | 11 | 10 | 3 | 1 |
| 213.0588   | -1.36066        | 4.5 | 252480.22      | 13 | 10 | 3 | 1 |
| 219.1059   | -0.6385         | 1.5 | 24954.98       | 19 | 10 | 3 | 1 |
| 220.0198   | -0.74948        | 8   | 445468.79      | 8  | 11 | 3 | 1 |
| 221.0278   | 0.045696        | 7.5 | 1054986.51     | 9  | 11 | 3 | 1 |

|          |          |      |            |    |    |   |   |
|----------|----------|------|------------|----|----|---|---|
| 222.0354 | -0.96786 | 7    | 75002.56   | 10 | 11 | 3 | 1 |
| 223.0434 | -0.17889 | 6.5  | 1401504.48 | 11 | 11 | 3 | 1 |
| 224.0509 | -1.62865 | 6    | 145168.54  | 12 | 11 | 3 | 1 |
| 225.059  | -0.39945 | 5.5  | 3809232.44 | 13 | 11 | 3 | 1 |
| 226.0666 | -1.39295 | 5    | 275629.01  | 14 | 11 | 3 | 1 |
| 227.0743 | -1.93725 | 4.5  | 473793.94  | 15 | 11 | 3 | 1 |
| 231.1059 | -0.60535 | 2.5  | 5917.13    | 19 | 11 | 3 | 1 |
| 233.0281 | 1.330743 | 8.5  | 478860.27  | 9  | 12 | 3 | 1 |
| 233.1217 | 0.043325 | 1.5  | 12195.94   | 21 | 11 | 3 | 1 |
| 235.0436 | 0.681151 | 7.5  | 343335.91  | 11 | 12 | 3 | 1 |
| 237.0591 | 0.042605 | 6.5  | 563291.92  | 13 | 12 | 3 | 1 |
| 239.0748 | 0.251386 | 5.5  | 3755693.56 | 15 | 12 | 3 | 1 |
| 241.0904 | 0.041893 | 4.5  | 253578.98  | 17 | 12 | 3 | 1 |
| 243.0125 | 1.481819 | 10.5 | 34732.24   | 7  | 13 | 3 | 1 |
| 244.0198 | -0.67576 | 10   | 89207.49   | 8  | 13 | 3 | 1 |
| 246.0356 | -0.06056 | 9    | 97960.91   | 10 | 13 | 3 | 1 |
| 247.0437 | 1.052851 | 8.5  | 241655.09  | 11 | 13 | 3 | 1 |
| 247.1374 | 0.243185 | 1.5  | 82320.34   | 23 | 12 | 3 | 1 |
| 248.0515 | 0.947788 | 8    | 25259.55   | 12 | 13 | 3 | 1 |
| 248.9653 | 0.44223  | 14.5 | 14001.6    | 1  | 14 | 3 | 1 |
| 249.0591 | 0.040553 | 7.5  | 155630.22  | 13 | 13 | 3 | 1 |
| 250.0668 | -0.45948 | 7    | 28662.05   | 14 | 13 | 3 | 1 |
| 251.0746 | -0.5572  | 6.5  | 399589.43  | 15 | 13 | 3 | 1 |
| 253.0904 | 0.039907 | 5.5  | 2191250.63 | 17 | 13 | 3 | 1 |
| 254.0039 | -1.63344 | 12   | 13149.49   | 6  | 14 | 3 | 1 |
| 254.0978 | -1.63283 | 5    | 193353.8   | 18 | 13 | 3 | 1 |
| 255.0125 | 1.41209  | 11.5 | 64827.38   | 7  | 14 | 3 | 1 |
| 255.1062 | 0.627582 | 4.5  | 167141.55  | 19 | 13 | 3 | 1 |
| 256.0197 | -1.03468 | 11   | 57768.26   | 8  | 14 | 3 | 1 |
| 258.0353 | -1.22037 | 10   | 191381.64  | 10 | 14 | 3 | 1 |
| 260.0508 | -1.78772 | 9    | 214390.12  | 12 | 14 | 3 | 1 |
| 261.1532 | 0.804509 | 1.5  | 27942.19   | 25 | 13 | 3 | 1 |
| 262.0664 | -1.96477 | 8    | 409036.77  | 14 | 14 | 3 | 1 |
| 263.075  | 0.988692 | 7.5  | 42291.37   | 15 | 14 | 3 | 1 |
| 265.0906 | 0.79256  | 6.5  | 118004.94  | 17 | 14 | 3 | 1 |
| 266.0977 | -1.935   | 6    | 88060.24   | 18 | 14 | 3 | 1 |
| 267.0122 | 0.225083 | 12.5 | 16746.63   | 7  | 15 | 3 | 1 |
| 267.1062 | 0.599387 | 5.5  | 1125887.07 | 19 | 14 | 3 | 1 |
| 268.0202 | 0.877173 | 12   | 39860.53   | 8  | 15 | 3 | 1 |
| 268.1135 | -1.36099 | 5    | 28165.31   | 20 | 14 | 3 | 1 |
| 269.1219 | 0.780688 | 4.5  | 222767.53  | 21 | 14 | 3 | 1 |
| 270.0357 | 0.315144 | 11   | 81872.34   | 10 | 15 | 3 | 1 |
| 272.0518 | 1.966909 | 10   | 26310.25   | 12 | 15 | 3 | 1 |
| 275.0752 | 1.672636 | 8.5  | 118117.73  | 15 | 15 | 3 | 1 |
| 275.169  | 1.308652 | 1.5  | 19781.89   | 27 | 14 | 3 | 1 |
| 276.0822 | -1.32171 | 8    | 28458.89   | 16 | 15 | 3 | 1 |

|          |          |      |             |    |    |   |   |
|----------|----------|------|-------------|----|----|---|---|
| 277.0902 | -0.68534 | 7.5  | 53883.88    | 17 | 15 | 3 | 1 |
| 278.0977 | -1.8515  | 7    | 73529.97    | 18 | 15 | 3 | 1 |
| 279.1062 | 0.573617 | 6.5  | 56823.45    | 19 | 15 | 3 | 1 |
| 280.0198 | -0.58889 | 13   | 42178.5     | 8  | 16 | 3 | 1 |
| 280.1134 | -1.65968 | 6    | 23668.86    | 20 | 15 | 3 | 1 |
| 281.1218 | 0.391645 | 5.5  | 756496.02   | 21 | 15 | 3 | 1 |
| 282.0354 | -0.76196 | 12   | 111914.98   | 10 | 16 | 3 | 1 |
| 282.1294 | -0.40726 | 5    | 7508.94     | 22 | 15 | 3 | 1 |
| 283.1375 | 0.56545  | 4.5  | 516173.71   | 23 | 15 | 3 | 1 |
| 284.051  | -0.93258 | 11   | 142584.37   | 12 | 16 | 3 | 1 |
| 284.9655 | 1.088203 | 17.5 | 9179.16     | 1  | 17 | 3 | 1 |
| 286.0665 | -1.45036 | 10   | 184593      | 14 | 16 | 3 | 1 |
| 287.0751 | 1.254377 | 9.5  | 383271.16   | 15 | 16 | 3 | 1 |
| 288.0821 | -1.61377 | 9    | 205003.24   | 16 | 16 | 3 | 1 |
| 289.1845 | 0.726526 | 1.5  | 19092.33    | 29 | 15 | 3 | 1 |
| 290.0977 | -1.77492 | 8    | 75511.22    | 18 | 16 | 3 | 1 |
| 292.0198 | -0.56469 | 14   | 7330.09     | 8  | 17 | 3 | 1 |
| 292.1136 | -0.90684 | 7    | 19278.07    | 20 | 16 | 3 | 1 |
| 293.1219 | 0.716767 | 6.5  | 51729.26    | 21 | 16 | 3 | 1 |
| 294.0358 | 0.629516 | 13   | 76175.96    | 10 | 17 | 3 | 1 |
| 294.1293 | -0.73063 | 6    | 6620.16     | 22 | 16 | 3 | 1 |
| 295.1373 | -0.13519 | 5.5  | 793677.3    | 23 | 16 | 3 | 1 |
| 296.0512 | -0.21922 | 12   | 42624.42    | 12 | 17 | 3 | 1 |
| 297.1531 | 0.370516 | 4.5  | 11867614.88 | 25 | 16 | 3 | 1 |
| 299.0752 | 1.538411 | 10.5 | 146237.85   | 15 | 17 | 3 | 1 |
| 301.0908 | 1.362049 | 9.5  | 112263.21   | 17 | 17 | 3 | 1 |
| 301.1845 | 0.69758  | 2.5  | 8529.25     | 29 | 16 | 3 | 1 |
| 302.0977 | -1.70441 | 9    | 30423.04    | 18 | 17 | 3 | 1 |
| 303.1065 | 1.517951 | 8.5  | 27513.2     | 19 | 17 | 3 | 1 |
| 303.2001 | 0.528034 | 1.5  | 72062.85    | 31 | 16 | 3 | 1 |
| 304.0195 | -1.52918 | 15   | 22336.87    | 8  | 18 | 3 | 1 |
| 304.1133 | -1.85753 | 8    | 21093.8     | 20 | 17 | 3 | 1 |
| 305.2159 | 1.016003 | 0.5  | 11244.4     | 33 | 16 | 3 | 1 |
| 306.0356 | -0.04869 | 14   | 57885.23    | 10 | 18 | 3 | 1 |
| 307.1376 | 0.846852 | 6.5  | 46177.14    | 23 | 17 | 3 | 1 |
| 308.0511 | -0.5353  | 13   | 116286.65   | 12 | 18 | 3 | 1 |
| 309.1531 | 0.356134 | 5.5  | 1218202.66  | 25 | 17 | 3 | 1 |
| 310.0668 | -0.37057 | 12   | 78343.28    | 14 | 18 | 3 | 1 |
| 311.169  | 1.15725  | 4.5  | 48840611.29 | 27 | 17 | 3 | 1 |
| 312.0822 | -1.16924 | 11   | 105808.24   | 16 | 18 | 3 | 1 |
| 314.0978 | -1.32092 | 10   | 71517.5     | 18 | 18 | 3 | 1 |
| 317.0278 | 0.031858 | 15.5 | 8987.97     | 9  | 19 | 3 | 1 |
| 317.122  | 0.977858 | 8.5  | 8356.7      | 21 | 18 | 3 | 1 |
| 317.2157 | 0.347083 | 1.5  | 26008.9     | 33 | 17 | 3 | 1 |
| 318.0359 | 0.89644  | 15   | 22813.17    | 10 | 19 | 3 | 1 |
| 319.044  | 1.75556  | 14.5 | 47274.12    | 11 | 19 | 3 | 1 |

|          |          |     |             |    |    |   |   |
|----------|----------|-----|-------------|----|----|---|---|
| 319.1376 | 0.81501  | 7.5 | 8342.32     | 23 | 18 | 3 | 1 |
| 319.2311 | -0.43824 | 0.5 | 7295.71     | 35 | 17 | 3 | 1 |
| 320.0513 | 0.10967  | 14  | 32294.41    | 12 | 19 | 3 | 1 |
| 321.153  | 0.031449 | 6.5 | 22855.27    | 25 | 18 | 3 | 1 |
| 323.1687 | 0.185971 | 5.5 | 1063626.52  | 27 | 18 | 3 | 1 |
| 325.1846 | 0.953613 | 4.5 | 43762883.49 | 29 | 18 | 3 | 1 |
| 328.1133 | -1.72166 | 10  | 15200.99    | 20 | 19 | 3 | 1 |
| 330.0361 | 1.469841 | 16  | 33860.29    | 10 | 20 | 3 | 1 |
| 331.2315 | 0.785252 | 1.5 | 39994.32    | 35 | 18 | 3 | 1 |
| 332.0513 | 0.105707 | 15  | 52290.68    | 12 | 20 | 3 | 1 |
| 333.1533 | 0.930804 | 7.5 | 18038.31    | 25 | 19 | 3 | 1 |
| 333.247  | 0.330386 | 0.5 | 10613.4     | 37 | 18 | 3 | 1 |
| 334.0669 | -0.0446  | 14  | 52885.6     | 14 | 20 | 3 | 1 |
| 335.1689 | 0.776027 | 6.5 | 22542.29    | 27 | 19 | 3 | 1 |
| 337.1845 | 0.623101 | 5.5 | 732218.37   | 29 | 19 | 3 | 1 |
| 339.2001 | 0.471993 | 4.5 | 29010380.77 | 31 | 19 | 3 | 1 |
| 340.1133 | -1.66091 | 11  | 9058.05     | 20 | 20 | 3 | 1 |
| 343.1375 | 0.466577 | 9.5 | 11387.02    | 23 | 20 | 3 | 1 |
| 344.0519 | 1.845946 | 16  | 39830       | 12 | 21 | 3 | 1 |
| 345.153  | 0.029262 | 8.5 | 6184.68     | 25 | 20 | 3 | 1 |
| 345.247  | 0.318902 | 1.5 | 57353.77    | 37 | 19 | 3 | 1 |
| 346.0675 | 1.690713 | 15  | 16795.02    | 14 | 21 | 3 | 1 |
| 347.2626 | 0.173068 | 0.5 | 23502.41    | 39 | 19 | 3 | 1 |
| 351.2003 | 1.025342 | 5.5 | 62486.73    | 31 | 20 | 3 | 1 |
| 353.2158 | 0.594821 | 4.5 | 142053.32   | 33 | 20 | 3 | 1 |
| 354.0359 | 0.805286 | 18  | 7611.31     | 10 | 22 | 3 | 1 |
| 356.0513 | 0.098581 | 17  | 30707.62    | 12 | 22 | 3 | 1 |
| 357.1535 | 1.428239 | 9.5 | 6947.24     | 25 | 21 | 3 | 1 |
| 358.0669 | -0.04161 | 16  | 44497.42    | 14 | 22 | 3 | 1 |
| 359.1689 | 0.724172 | 8.5 | 62786.83    | 27 | 21 | 3 | 1 |
| 359.2628 | 0.723983 | 1.5 | 232395.49   | 39 | 20 | 3 | 1 |
| 361.2784 | 0.581546 | 0.5 | 48368.69    | 41 | 20 | 3 | 1 |
| 364.1133 | -1.55144 | 13  | 12805.88    | 20 | 22 | 3 | 1 |
| 365.2159 | 0.849088 | 5.5 | 35034.18    | 33 | 21 | 3 | 1 |
| 367.2315 | 0.708273 | 4.5 | 79992.21    | 35 | 21 | 3 | 1 |
| 368.0513 | 0.095367 | 18  | 17964.41    | 12 | 23 | 3 | 1 |
| 370.0672 | 0.770401 | 17  | 16118.09    | 14 | 23 | 3 | 1 |
| 373.1844 | 0.295028 | 8.5 | 440891.4    | 29 | 22 | 3 | 1 |
| 373.2783 | 0.294954 | 1.5 | 77785.49    | 41 | 21 | 3 | 1 |
| 375.2    | 0.160181 | 7.5 | 29639.27    | 31 | 22 | 3 | 1 |
| 375.294  | 0.426599 | 0.5 | 34558.68    | 43 | 21 | 3 | 1 |
| 378.0353 | -0.83299 | 20  | 7175.48     | 10 | 24 | 3 | 1 |
| 379.2314 | 0.42217  | 5.5 | 25040.17    | 35 | 22 | 3 | 1 |
| 380.0513 | 0.092356 | 19  | 19583.78    | 12 | 24 | 3 | 1 |
| 381.2472 | 0.813384 | 4.5 | 99219.65    | 37 | 22 | 3 | 1 |
| 382.0673 | 1.007939 | 18  | 22109.14    | 14 | 24 | 3 | 1 |

|          |          |     |            |    |    |   |   |
|----------|----------|-----|------------|----|----|---|---|
| 387.2003 | 0.93001  | 8.5 | 20635.54   | 31 | 23 | 3 | 1 |
| 387.2941 | 0.671583 | 1.5 | 102315.52  | 43 | 22 | 3 | 1 |
| 389.3098 | 0.796539 | 0.5 | 50416.6    | 45 | 22 | 3 | 1 |
| 392.052  | 1.87501  | 20  | 11169.09   | 12 | 25 | 3 | 1 |
| 393.247  | 0.279977 | 5.5 | 8403.54    | 37 | 23 | 3 | 1 |
| 394.0672 | 0.723481 | 19  | 12772.95   | 14 | 25 | 3 | 1 |
| 395.2626 | 0.152051 | 4.5 | 14189.72   | 39 | 23 | 3 | 1 |
| 401.3097 | 0.523536 | 1.5 | 135061.61  | 45 | 23 | 3 | 1 |
| 403.3253 | 0.39695  | 0.5 | 56359.48   | 47 | 23 | 3 | 1 |
| 404.0516 | 0.82935  | 21  | 6245.62    | 12 | 26 | 3 | 1 |
| 406.0667 | -0.52922 | 20  | 18169.64   | 14 | 26 | 3 | 1 |
| 407.2627 | 0.393113 | 5.5 | 10014.45   | 39 | 24 | 3 | 1 |
| 409.2784 | 0.513343 | 4.5 | 33817.13   | 41 | 24 | 3 | 1 |
| 413.3097 | 0.508336 | 2.5 | 6415.23    | 45 | 24 | 3 | 1 |
| 415.3255 | 0.867032 | 1.5 | 216112.79  | 47 | 24 | 3 | 1 |
| 417.3412 | 0.98265  | 0.5 | 81190.38   | 49 | 24 | 3 | 1 |
| 421.2786 | 0.973466 | 5.5 | 6238.92    | 41 | 25 | 3 | 1 |
| 423.2943 | 1.086952 | 4.5 | 12375.7    | 43 | 25 | 3 | 1 |
| 428.052  | 1.717318 | 23  | 5820.86    | 12 | 28 | 3 | 1 |
| 429.2471 | 0.489462 | 8.5 | 6083.06    | 37 | 26 | 3 | 1 |
| 429.3409 | 0.25644  | 1.5 | 122144.16  | 49 | 25 | 3 | 1 |
| 430.0664 | -1.19726 | 22  | 17394.26   | 14 | 28 | 3 | 1 |
| 431.3566 | 0.371155 | 0.5 | 81827.43   | 51 | 25 | 3 | 1 |
| 435.2944 | 1.286717 | 5.5 | 20293.95   | 43 | 26 | 3 | 1 |
| 437.3097 | 0.480438 | 4.5 | 1988029.08 | 45 | 26 | 3 | 1 |
| 443.3567 | 0.586661 | 1.5 | 114260.66  | 51 | 26 | 3 | 1 |
| 444.0823 | -0.59651 | 22  | 12508.27   | 16 | 29 | 3 | 1 |
| 445.3726 | 1.145334 | 0.5 | 109120.09  | 53 | 26 | 3 | 1 |
| 448.0195 | -1.03768 | 27  | 7153.55    | 8  | 30 | 3 | 1 |
| 449.31   | 1.135298 | 5.5 | 23729.22   | 45 | 27 | 3 | 1 |
| 451.3255 | 0.797873 | 4.5 | 2617857.06 | 47 | 27 | 3 | 1 |
| 452.051  | -0.586   | 25  | 7224.87    | 12 | 30 | 3 | 1 |
| 455.3564 | -0.08762 | 2.5 | 7275.4     | 51 | 27 | 3 | 1 |
| 457.2788 | 1.334199 | 8.5 | 15325.34   | 41 | 28 | 3 | 1 |
| 457.3726 | 1.115284 | 1.5 | 120449.42  | 53 | 27 | 3 | 1 |
| 459.2944 | 1.219481 | 7.5 | 651176.31  | 43 | 28 | 3 | 1 |
| 459.3883 | 1.219231 | 0.5 | 142314.86  | 55 | 27 | 3 | 1 |
| 465.3411 | 0.666393 | 4.5 | 684957.93  | 49 | 28 | 3 | 1 |
| 467.3566 | 0.342565 | 3.5 | 6840.47    | 51 | 28 | 3 | 1 |
| 468.0829 | 0.715899 | 24  | 6583.79    | 16 | 31 | 3 | 1 |
| 471.3881 | 0.763915 | 1.5 | 159293.97  | 55 | 28 | 3 | 1 |
| 473.3101 | 1.289009 | 7.5 | 11082.68   | 45 | 29 | 3 | 1 |
| 473.4038 | 0.86628  | 0.5 | 161982.11  | 57 | 28 | 3 | 1 |
| 477.3415 | 1.487616 | 5.5 | 9168.48    | 49 | 29 | 3 | 1 |
| 478.0662 | -1.4954  | 26  | 13236.43   | 14 | 32 | 3 | 1 |
| 479.3569 | 0.959829 | 4.5 | 1146401.86 | 51 | 29 | 3 | 1 |



|          |          |      |           |    |    |   |   |
|----------|----------|------|-----------|----|----|---|---|
| 480.0819 | -1.38497 | 25   | 14425.82  | 16 | 32 | 3 | 1 |
| 482.0978 | -0.86061 | 24   | 19727.41  | 18 | 32 | 3 | 1 |
| 485.4039 | 1.050879 | 1.5  | 107258.4  | 57 | 29 | 3 | 1 |
| 487.4197 | 1.354276 | 0.5  | 130349.37 | 59 | 29 | 3 | 1 |
| 490.0662 | -1.45878 | 27   | 6310.72   | 14 | 33 | 3 | 1 |
| 491.075  | 0.529655 | 26.5 | 15165.39  | 15 | 33 | 3 | 1 |
| 493.3726 | 1.033905 | 4.5  | 79552.2   | 53 | 30 | 3 | 1 |
| 497.122  | 0.623791 | 23.5 | 50024.57  | 21 | 33 | 3 | 1 |
| 497.4032 | -0.38178 | 2.5  | 6537.69   | 57 | 30 | 3 | 1 |
| 499.4196 | 1.121503 | 1.5  | 98611.89  | 59 | 30 | 3 | 1 |
| 501.0596 | 1.018044 | 28.5 | 8247.73   | 13 | 34 | 3 | 1 |
| 501.4353 | 1.216709 | 0.5  | 73903     | 61 | 30 | 3 | 1 |
| 503.0739 | -1.66953 | 27.5 | 11454.75  | 15 | 34 | 3 | 1 |
| 504.0819 | -1.31903 | 27   | 5297.95   | 16 | 34 | 3 | 1 |
| 506.0975 | -1.41257 | 26   | 15386.99  | 18 | 34 | 3 | 1 |
| 507.3882 | 0.906802 | 4.5  | 276096.17 | 55 | 31 | 3 | 1 |
| 513.4351 | 0.798738 | 1.5  | 81362.23  | 61 | 31 | 3 | 1 |
| 515.4507 | 0.698612 | 0.5  | 50979     | 63 | 31 | 3 | 1 |
| 517.0894 | -1.91437 | 27.5 | 17617.95  | 17 | 35 | 3 | 1 |
| 519.1053 | -1.42533 | 26.5 | 32974.64  | 19 | 35 | 3 | 1 |
| 521.122  | 0.595063 | 25.5 | 48072.17  | 21 | 35 | 3 | 1 |
| 523.4198 | 1.452183 | 3.5  | 9818.56   | 59 | 32 | 3 | 1 |
| 525.4347 | 0.019222 | 2.5  | 6332.5    | 61 | 32 | 3 | 1 |
| 527.4507 | 0.682718 | 1.5  | 62272.22  | 63 | 32 | 3 | 1 |
| 529.0909 | 0.964107 | 28.5 | 27382.01  | 17 | 36 | 3 | 1 |
| 529.4666 | 1.152293 | 0.5  | 27894.39  | 65 | 32 | 3 | 1 |
| 531.1057 | -0.63999 | 27.5 | 36187.36  | 19 | 36 | 3 | 1 |
| 532.1136 | -0.49783 | 27   | 16607.4   | 20 | 36 | 3 | 1 |
| 533.1225 | 1.519541 | 26.5 | 35800.24  | 21 | 36 | 3 | 1 |
| 534.1286 | -1.71288 | 26   | 19849.63  | 22 | 36 | 3 | 1 |
| 536.1442 | -1.7997  | 25   | 10514.56  | 24 | 36 | 3 | 1 |
| 541.4663 | 0.572704 | 1.5  | 35543.72  | 65 | 33 | 3 | 1 |
| 543.1052 | -1.54648 | 28.5 | 24889.43  | 19 | 37 | 3 | 1 |
| 543.4822 | 1.030578 | 0.5  | 15459.14  | 67 | 33 | 3 | 1 |
| 545.1211 | -1.08214 | 27.5 | 36949.83  | 21 | 37 | 3 | 1 |
| 547.1364 | -1.71785 | 26.5 | 24484.76  | 23 | 37 | 3 | 1 |
| 555.4822 | 1.008314 | 1.5  | 14634.89  | 67 | 34 | 3 | 1 |
| 557.1225 | 1.454081 | 28.5 | 28581.11  | 21 | 38 | 3 | 1 |
| 557.4973 | 0.018117 | 0.5  | 6507.39   | 69 | 34 | 3 | 1 |
| 558.1292 | -0.56421 | 28   | 13578.17  | 22 | 38 | 3 | 1 |
| 563.0757 | 1.705102 | 32.5 | 5534.08   | 15 | 39 | 3 | 1 |
| 565.0908 | 0.725725 | 31.5 | 14214.81  | 17 | 39 | 3 | 1 |
| 566.0982 | -0.02632 | 31   | 14442.08  | 18 | 39 | 3 | 1 |
| 567.1065 | 0.811312 | 30.5 | 17315.17  | 19 | 39 | 3 | 1 |
| 569.4977 | 0.720109 | 1.5  | 17623.75  | 69 | 35 | 3 | 1 |
| 571.1366 | -1.29549 | 28.5 | 27920     | 23 | 39 | 3 | 1 |

|          |          |      |           |    |    |   |   |
|----------|----------|------|-----------|----|----|---|---|
| 572.1463 | 1.983937 | 28   | 10832.4   | 24 | 39 | 3 | 1 |
| 573.1528 | -0.33133 | 27.5 | 28036.72  | 25 | 39 | 3 | 1 |
| 575.1686 | -0.06937 | 26.5 | 6390.75   | 27 | 39 | 3 | 1 |
| 575.3557 | -1.28599 | 12.5 | 372785.12 | 51 | 37 | 3 | 1 |
| 577.0914 | 1.750332 | 32.5 | 5846.93   | 17 | 40 | 3 | 1 |
| 579.1056 | -0.75962 | 31.5 | 11019.95  | 19 | 40 | 3 | 1 |
| 581.1216 | -0.1547  | 30.5 | 26001.99  | 21 | 40 | 3 | 1 |
| 582.1288 | -1.22808 | 30   | 13463.09  | 22 | 40 | 3 | 1 |
| 583.514  | 1.816755 | 1.5  | 7690.78   | 71 | 36 | 3 | 1 |
| 584.1458 | 1.08723  | 29   | 19214.85  | 24 | 40 | 3 | 1 |
| 585.1537 | 1.213529 | 28.5 | 26074.06  | 25 | 40 | 3 | 1 |
| 586.0658 | -1.90234 | 35   | 6245.74   | 14 | 41 | 3 | 1 |
| 586.1598 | -1.73144 | 28   | 11181.97  | 26 | 40 | 3 | 1 |
| 587.1679 | -1.26011 | 27.5 | 12745.46  | 27 | 40 | 3 | 1 |
| 589.09   | -0.66187 | 33.5 | 20175.48  | 17 | 41 | 3 | 1 |
| 591.1053 | -1.25172 | 32.5 | 12807.28  | 19 | 41 | 3 | 1 |
| 595.1368 | -0.90719 | 30.5 | 21930.32  | 23 | 41 | 3 | 1 |
| 597.1529 | -0.15055 | 29.5 | 22352.35  | 25 | 41 | 3 | 1 |
| 604.1131 | -1.26615 | 33   | 13160.63  | 20 | 42 | 3 | 1 |
| 605.1218 | 0.181947 | 32.5 | 16097.41  | 21 | 42 | 3 | 1 |
| 606.1286 | -1.50941 | 32   | 7101.29   | 22 | 42 | 3 | 1 |
| 607.1375 | 0.263697 | 31.5 | 21543.71  | 23 | 42 | 3 | 1 |
| 608.1443 | -1.42219 | 31   | 11416.41  | 24 | 42 | 3 | 1 |
| 609.1537 | 1.165717 | 30.5 | 17784.96  | 25 | 42 | 3 | 1 |
| 611.1693 | 1.080062 | 29.5 | 13154.39  | 27 | 42 | 3 | 1 |
| 613.0912 | 1.321339 | 35.5 | 7337.75   | 17 | 43 | 3 | 1 |
| 613.1843 | 0.016471 | 28.5 | 11908.85  | 29 | 42 | 3 | 1 |
| 615.1054 | -1.04031 | 34.5 | 15611.97  | 19 | 43 | 3 | 1 |
| 617.1209 | -1.27997 | 33.5 | 16836.95  | 21 | 43 | 3 | 1 |
| 619.1363 | -1.6796  | 32.5 | 15732.65  | 23 | 43 | 3 | 1 |
| 621.1539 | 1.465178 | 31.5 | 24963.84  | 25 | 43 | 3 | 1 |
| 624.1754 | -1.70609 | 30   | 6402.81   | 28 | 43 | 3 | 1 |
| 627.1072 | 1.849926 | 35.5 | 10334.94  | 19 | 44 | 3 | 1 |
| 628.1132 | -1.05857 | 35   | 7751.09   | 20 | 44 | 3 | 1 |
| 631.1382 | 1.362778 | 33.5 | 15190.7   | 23 | 44 | 3 | 1 |
| 634.1614 | 0.922637 | 32   | 7880.19   | 26 | 44 | 3 | 1 |
| 637.1843 | 0.015851 | 30.5 | 8270.88   | 29 | 44 | 3 | 1 |
| 639.1065 | 0.719912 | 36.5 | 7097.69   | 19 | 45 | 3 | 1 |
| 640.1148 | 1.460834 | 36   | 6840.82   | 20 | 45 | 3 | 1 |
| 643.1365 | -1.30594 | 34.5 | 16331.6   | 23 | 45 | 3 | 1 |
| 645.152  | -1.53436 | 33.5 | 12488.47  | 25 | 45 | 3 | 1 |
| 647.1681 | -0.83425 | 32.5 | 7629.16   | 27 | 45 | 3 | 1 |
| 648.1754 | -1.64292 | 32   | 7210.56   | 28 | 45 | 3 | 1 |
| 651.1992 | -1.13621 | 30.5 | 5884.31   | 31 | 45 | 3 | 1 |
| 669.1524 | -0.88156 | 35.5 | 12905.8   | 25 | 47 | 3 | 1 |
| 672.1777 | 1.837464 | 34   | 7430.7    | 28 | 47 | 3 | 1 |

|          |          |      |          |     |    |   |   |
|----------|----------|------|----------|-----|----|---|---|
| 673.1841 | -0.28209 | 33.5 | 6532.81  | 29  | 47 | 3 | 1 |
| 675.2006 | 0.977636 | 32.5 | 7080.86  | 31  | 47 | 3 | 1 |
| 678.129  | -0.75929 | 38   | 9133.38  | 22  | 48 | 3 | 1 |
| 683.1673 | -1.9613  | 35.5 | 11916.82 | 27  | 48 | 3 | 1 |
| 685.0905 | 0.160709 | 41.5 | 5929.28  | 17  | 49 | 3 | 1 |
| 687.2007 | 1.106083 | 33.5 | 8159.32  | 31  | 48 | 3 | 1 |
| 695.168  | -0.9205  | 36.5 | 7184.02  | 27  | 49 | 3 | 1 |
| 710.1907 | -1.99228 | 36   | 9552.82  | 30  | 50 | 3 | 1 |
| 713.2168 | 1.696682 | 34.5 | 6108.4   | 33  | 50 | 3 | 1 |
| 719.1682 | -0.61168 | 38.5 | 11162.79 | 27  | 51 | 3 | 1 |
| 725.1225 | 1.117192 | 42.5 | 7221.15  | 21  | 52 | 3 | 1 |
| 728.1447 | -0.63847 | 41   | 10874.23 | 24  | 52 | 3 | 1 |
| 735.2001 | 0.217764 | 37.5 | 7090.21  | 31  | 52 | 3 | 1 |
| 745.1832 | -1.46259 | 39.5 | 6343.57  | 29  | 53 | 3 | 1 |
| 754.1606 | -0.28495 | 42   | 15076.34 | 26  | 54 | 3 | 1 |
| 756.1751 | -1.805   | 41   | 16690.33 | 28  | 54 | 3 | 1 |
| 764.1437 | -1.91704 | 44   | 9661.12  | 24  | 55 | 3 | 1 |
| 765.1528 | -0.24819 | 43.5 | 6110.99  | 25  | 55 | 3 | 1 |
| 766.16   | -1.06361 | 43   | 5977.72  | 26  | 55 | 3 | 1 |
| 776.1448 | -0.47014 | 45   | 8115.8   | 24  | 56 | 3 | 1 |
| 784.2077 | -0.08276 | 41   | 6414.21  | 32  | 56 | 3 | 1 |
| 792.1757 | -0.96557 | 44   | 8651.25  | 28  | 57 | 3 | 1 |
| 802.1611 | 0.355415 | 46   | 10177.1  | 26  | 58 | 3 | 1 |
| 835.6999 | -1.00502 | 8.5  | 46269.73 | 95  | 55 | 3 | 1 |
| 848.2381 | -1.13753 | 44   | 6680.94  | 36  | 61 | 3 | 1 |
| 854.1915 | -0.71986 | 48   | 8329.56  | 30  | 62 | 3 | 1 |
| 855.1995 | -0.51438 | 47.5 | 6358.64  | 31  | 62 | 3 | 1 |
| 863.7323 | 0.301135 | 8.5  | 58091.3  | 99  | 57 | 3 | 1 |
| 891.7626 | -0.8297  | 8.5  | 11985.84 | 103 | 59 | 3 | 1 |
| 893.2155 | -0.10065 | 49.5 | 6064.56  | 33  | 65 | 3 | 1 |
| 898.1599 | -1.01864 | 54   | 6883.31  | 26  | 66 | 3 | 1 |
| 941.2164 | 0.860695 | 53.5 | 5976.65  | 33  | 69 | 3 | 1 |
| 948.269  | -1.43936 | 50   | 6427.31  | 40  | 69 | 3 | 1 |
| 993.2453 | -1.60071 | 55.5 | 7737.8   | 37  | 73 | 3 | 1 |
| 1028.239 | -0.54939 | 59   | 5882.74  | 36  | 76 | 3 | 1 |

c)

| Mass (m/z) | Deviation (ppm) | DBE | Intensity (AU) | H  | C  | O | S |
|------------|-----------------|-----|----------------|----|----|---|---|
| 106.9809   | 0.561782839     | 1.5 | 11985.31       | 3  | 2  | 3 | 1 |
| 156.9964   | -0.572624268    | 4.5 | 85848.85       | 5  | 6  | 3 | 1 |
| 171.0121   | -0.233316769    | 4.5 | 8278.56        | 7  | 7  | 3 | 1 |
| 297.1531   | 0.370516211     | 4.5 | 75644.46       | 25 | 16 | 3 | 1 |
| 311.1688   | 0.514512002     | 4.5 | 295070.3       | 27 | 17 | 3 | 1 |
| 325.1843   | 0.031059311     | 4.5 | 275892.6       | 29 | 18 | 3 | 1 |
| 339.2      | 0.177181635     | 4.5 | 68174.87       | 31 | 19 | 3 | 1 |
| 155.9886   | -0.416055872    | 5   | 50009.39       | 4  | 6  | 3 | 1 |
| 170.0043   | -0.087644834    | 5   | 193261.1       | 6  | 7  | 3 | 1 |

|          |              |      |          |    |    |   |   |
|----------|--------------|------|----------|----|----|---|---|
| 184.0199 | -0.352679124 | 5    | 94614.58 | 8  | 8  | 3 | 1 |
| 198.0355 | -0.580198668 | 5    | 3177.24  | 10 | 9  | 3 | 1 |
| 183.0121 | -0.218018324 | 5.5  | 5819652  | 7  | 8  | 3 | 1 |
| 197.0278 | 0.051261804  | 5.5  | 409289   | 9  | 9  | 3 | 1 |
| 211.0435 | 0.284775495  | 5.5  | 38650.67 | 11 | 10 | 3 | 1 |
| 225.0591 | 0.044877103  | 5.5  | 28921.2  | 13 | 11 | 3 | 1 |
| 239.0749 | 0.66966506   | 5.5  | 29204.32 | 15 | 12 | 3 | 1 |
| 253.0905 | 0.435022444  | 5.5  | 11567.52 | 17 | 13 | 3 | 1 |
| 267.1064 | 1.348153715  | 5.5  | 2877.42  | 19 | 14 | 3 | 1 |
| 295.1375 | 0.542459317  | 5.5  | 6298.23  | 23 | 16 | 3 | 1 |
| 309.1532 | 0.679598797  | 5.5  | 9376.64  | 25 | 17 | 3 | 1 |
| 323.1686 | -0.12346495  | 5.5  | 9393.61  | 27 | 18 | 3 | 1 |
| 196.0199 | -0.331088724 | 6    | 86192.03 | 8  | 9  | 3 | 1 |
| 210.0353 | -1.499269541 | 6    | 4897.37  | 10 | 10 | 3 | 1 |
| 180.9965 | 0.055802187  | 6.5  | 100900.8 | 5  | 8  | 3 | 1 |
| 195.0121 | -0.204602647 | 6.5  | 306767.7 | 7  | 9  | 3 | 1 |
| 209.0278 | 0.048318934  | 6.5  | 172641.7 | 9  | 10 | 3 | 1 |
| 223.0436 | 0.717797394  | 6.5  | 17874.88 | 11 | 11 | 3 | 1 |
| 237.0591 | 0.042605411  | 6.5  | 5164.54  | 13 | 12 | 3 | 1 |
| 194.0042 | -0.592254869 | 7    | 5085.41  | 6  | 9  | 3 | 1 |
| 207.0122 | 0.290321138  | 7.5  | 36289.6  | 7  | 10 | 3 | 1 |
| 221.0279 | 0.498127408  | 7.5  | 22893.32 | 9  | 11 | 3 | 1 |
| 235.0436 | 0.681150685  | 7.5  | 3652.35  | 11 | 12 | 3 | 1 |
| 233.028  | 0.901609203  | 8.5  | 3000.88  | 9  | 12 | 3 | 1 |
| 252.9961 | -1.541128101 | 12.5 | 5215.16  | 5  | 14 | 3 | 1 |
| 250.9804 | -1.752723436 | 13.5 | 3296.72  | 3  | 14 | 3 | 1 |
